# Supplementary material for: Optically pure γ-butyrolactones and epoxy esters via two stereocentered HKR of 3-substituted epoxy esters: a formal synthesis of (−)-paroxetine, Ro 67-8867 and (+)-eldanolide
Source: Royal Society of Chemistry journal article supplement (doi:10.1039/c3ob27321k), 2013-01-01

## **Electronic Supplementary Information (ESI)**

### **“Optically pure $\gamma$ -butyrolactones and epoxy esters *via* two stereocentered HKR of 3-substitued epoxy esters: a formal synthesis of (-)-paroxetine, Ro 67-8867 and (+)-eldanolide”**

Dattatray A. Devalankar, Pratibha U. Karabal and Arumugam Sudalai\*

Chemical Engineering & Process Development Division, National Chemical Laboratory,  
Dr. Homi Bhabha Road, Pune-411008, Maharashtra, India.

Tel.: +91 20 25902565; Fax: +91 20 25902676; e-mail: [a.sudalai@ncl.res.in](mailto:a.sudalai@ncl.res.in)

### **Table of Contents**

| <b>Sr.No.</b> | <b>Description</b>   |
|---------------|----------------------|
| 1             | General information  |
| 2             | Experimental section |
| 3             | References           |
| 4             | Spectra              |

#### **1. General Information**

Solvents were purified and dried by standard procedures before use. Optical rotations were measured using sodium D line on a JASCO-181 digital polarimeter. IR spectra were recorded on a Perkin-Elmer model 683 B and absorption is expressed in  $\text{cm}^{-1}$ .  $^1\text{H}$  NMR

and  $^{13}\text{C}$  NMR spectra were recorded on Bruker AC-200 spectrometer unless mentioned otherwise. Elemental analysis was carried out on a Carlo Erba CHNS-O analyzer. Purification was done using column chromatography (60-120 mesh). Enantiomeric excesses were determined on Agilent HPLC instrument equipped with a chiral column. HRMS data were recorded on a Thermo Scientific Q-Exactive, Accela 1250 pump.

## 2. Experimental Section

### 2.1 A general experimental procedure for Hydrolytic Kinetic Resolution (HKR) of 3-substituted epoxy esters (**7a-h** & **10 a-d**):

To a solution of (*R,R*)- or (*S,S*)-(salen)Co(II)complex (0.024 mmol, 0.5 mol %) in toluene (1 mL), acetic acid (0.014 g, 0.24 mmol) was added. It was allowed to stir at 25 °C in open air for 30 min. during which time the color changed from orange-red to a dark brown and it was then concentrated under reduced pressure to get the Co(III)-salen complex-**6** as brown colored solid. To this racemic 3-substituted epoxy esters **7/10** (4.85 mmol) and H<sub>2</sub>O (0.043 g, 2.42 mmol) was added at 0 °C. The reaction was allowed to warm to 25 °C and stirred for 12 h. After completion of reaction (monitored by TLC). The crude product was purified by column chromatography over silica gel to give chiral epoxy esters **9a-g** and **12a-d** [solvent system; petroleum ether: ethyl acetate (9:1)] and chiral  $\gamma$ -butyrolactones **8a-g** and **11a-d** [solvent system; petroleum ether: ethyl acetate (1:1)] in pure form.

**(R)-methyl 3-(4-fluorophenyl)-3-((S)-oxiran-2-yl)propanoate (9b)**

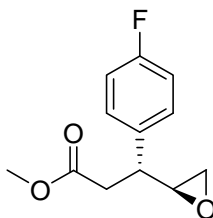

**Yield:** 49%, colorless thick liquid;  $[\alpha]_{\text{D}}^{25} = -7.47$  (*c* 1, CHCl<sub>3</sub>); **IR:** (CHCl<sub>3</sub>, cm<sup>-1</sup>) 1736; **<sup>1</sup>H NMR** (200 MHz, CDCl<sub>3</sub>)  $\delta$  2.56 (dd, *J* = 2.8, 4.8 Hz, 1H), 2.68-2.75 (m, 2H), 2.86 (dd, *J* = 5.5, 15.6 Hz, 1H), 3.01 (m, 2H), 3.60 (s, 3H), 7.01 (m, 2H), 7.21 (m, 2H); **<sup>13</sup>C NMR** (50 MHz, CDCl<sub>3</sub>):  $\delta$  37.20, 43.97, 46.74, 51.66, 55.11, 115.81 (d, *J* = 21.2 Hz), 129.27 (d, *J* = 8.1 Hz), 135.51 (d, *J* = 3.3 Hz), 162.00 (d, *J* = 245.9 Hz), 171.74; **HRMS (*m/z*):** calculated [M+H]<sup>+</sup> for C<sub>12</sub>H<sub>14</sub>FO<sub>3</sub> : 225.0921 found: 225.0921; **Optical purity:** 99% ee determined by HPLC analysis (Chiral OJ-H column, *n*-hexane/ 2-propanol (90:10), 0.5 mL/min, 254 nm) Retention time: *t*<sub>major</sub> = 23.61 and *t*<sub>minor</sub> = 29.29 min.

**(4S, 5R)-4-(4-chlorophenyl)-5-(hydroxymethyl)dihydrofuran-2(3H)-one (8c)**

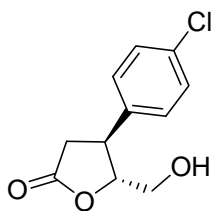

**Yield:** 45%, colorless thick liquid;  $[\alpha]_{\text{D}}^{25} = -26.6$  (*c* 1, CHCl<sub>3</sub>); **IR:** (CHCl<sub>3</sub>, cm<sup>-1</sup>) 1777, 3438; **<sup>1</sup>H NMR** (200 MHz, CDCl<sub>3</sub>)  $\delta$  2.35 (br s, 1H), 2.72 (dd, *J* = 9.6, 17.7 Hz, 1H), 3.03 (dd, *J* = 9.1, 17.7 Hz, 1H), 3.60-3.78 (m, 2H), 3.92-4.00 (m, 1H), 4.48 (m, 1H), 7.21 (d, *J* = 8.5 Hz, 2H), 7.35 (d, *J* = 8.6 Hz, 2H); **<sup>13</sup>C NMR** (50 MHz, CDCl<sub>3</sub>):  $\delta$  37.17, 41.37, 61.63, 86.94, 128.59, 129.37, 133.70, 137.85, 175.88; **HRMS (*m/z*):** calculated [M+H]<sup>+</sup> for C<sub>11</sub>H<sub>12</sub>ClO<sub>3</sub> : 227.0469 found: 227.0470; **Optical purity:** 98% ee determined

by HPLC analysis (Chiral OJ-H column, *n*-hexane/ 2-propanol (50:50), 0.5 mL/min, 254 nm) Retention time:  $t_{\text{minor}} = 11.21$  and  $t_{\text{major}} = 11.64$  min.

**(*R*)-methyl 3-(4-chlorophenyl)-3-((*S*)-oxiran-2-yl)propanoate (9c)**

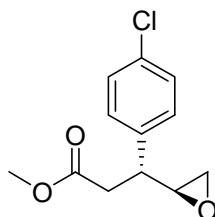

**Yield:** 48%, colorless thick liquid;  $[\alpha]_{\text{D}}^{25} = -11.8$  ( $c$  1,  $\text{CHCl}_3$ ); **IR:** ( $\text{CHCl}_3$ ,  $\text{cm}^{-1}$ ) 1736;  **$^1\text{H NMR}$**  (200 MHz,  $\text{CDCl}_3$ )  $\delta$  2.56 (dd,  $J = 2.4, 4.7$  Hz, 1H), 2.65-3.09 (m, 5H), 3.60 (s, 3H), 7.16 (m, 2H), 7.30 (m, 2H);  **$^{13}\text{C NMR}$**  (50 MHz,  $\text{CDCl}_3$ ):  $\delta$  36.93, 44.03, 46.65, 51.64, 54.89, 128.85, 129.01, 133.14, 138.29, 171.59; **HRMS ( $m/z$ ):** calculated  $[\text{M}+\text{H}]^+$  for  $\text{C}_{12}\text{H}_{14}\text{ClO}_3$ : 241.0626 found: 241.0626; **Optical purity:** 98% ee determined by HPLC analysis (OD-H column, *n*-hexane/ 2-propanol (90:10), 0.5 mL/min, 254 nm) Retention time:  $t_{\text{minor}} = 12.79$  and  $t_{\text{major}} = 13.53$  min.

**(4*S*, 5*R*)-4-(4-bromophenyl)-5-(hydroxymethyl)dihydrofuran-2(3*H*)-one (8d)**

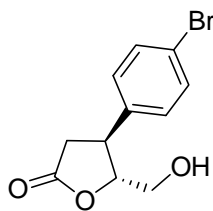

**Yield:** 46%, colorless thick liquid;  $[\alpha]_{\text{D}}^{25} = -21.2$  ( $c$  1,  $\text{CHCl}_3$ ); **IR:** ( $\text{CHCl}_3$ ,  $\text{cm}^{-1}$ ) 1775, 3440;  **$^1\text{H NMR}$**  (200 MHz,  $\text{CDCl}_3$ )  $\delta$  2.30 (br s, 1H), 2.72 (dd,  $J = 9.6, 17.8$  Hz, 1H), 3.03 (dd,  $J = 9.1, 17.7$  Hz, 1H), 3.59-3.77 (m, 2H), 3.93-3.99 (m, 1H), 4.48 (m, 1H), 7.15 (d,  $J = 8.5$  Hz, 2H), 7.50 (d,  $J = 8.5$  Hz, 2H);  **$^{13}\text{C NMR}$**  (50 MHz,  $\text{CDCl}_3$ ):  $\delta$  37.04,

41.35, 61.48, 86.94, 121.55, 128.93, 132.19, 138.31, 176.16; **HRMS** ( $m/z$ ): calculated  $[M+H]^+$  for  $C_{11}H_{12}BrO_3$ : 270.9964 found: 270.9965; **Optical purity**: 96% ee determined by HPLC analysis (Chiral OJ-H column, *n*-hexane/ 2-propanol (50:50), 0.5 mL/min, 254 nm) Retention time:  $t_{\text{minor}} = 11.91$  and  $t_{\text{major}} = 12.47$  min.

**(R)-methyl 3-(4-bromophenyl)-3-((S)-oxiran-2-yl)propanoate (9d)**

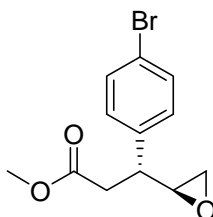

**Yield**: 48%, colorless thick liquid;  $[\alpha]_D^{25} = -8.8$  ( $c$  1,  $CHCl_3$ ); **IR**: ( $CHCl_3$ ,  $cm^{-1}$ ) 1734;  **$^1H$  NMR** (200 MHz,  $CDCl_3$ )  $\delta$  2.55 (dd,  $J = 2.3, 4.7$  Hz, 1H), 2.65-3.09 (m, 5H), 3.60 (s, 3H), 7.13 (d,  $J = 8.5$  Hz, 2H), 7.45 (d,  $J = 8.3$  Hz, 2H);  **$^{13}C$  NMR** (50 MHz,  $CDCl_3$ ):  $\delta$  36.76, 43.99, 46.52, 51.54, 54.71, 121.12, 129.33, 131.70, 138.79, 171.45; **HRMS** ( $m/z$ ): calculated  $[M+H]^+$  for  $C_{12}H_{14}BrO_3$ : 285.0121 found: 285.0121; **Optical purity**: 96% ee determined by HPLC analysis (OD-H column, *n*-hexane/ 2-propanol (95:5), 0.5 mL/min, 254 nm) Retention time:  $t_{\text{minor}} = 13.54$  and  $t_{\text{major}} = 14.33$  min.

**(4S, 5R)-5-(hydroxymethyl)-4-(4-methoxyphenyl)dihydro-furan-2(3H)-one (8e)**

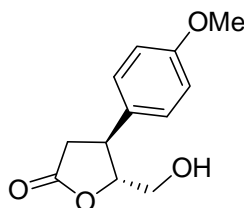

**Yield**: 48%, colorless solid m.p.: 93 °C;  $[\alpha]_D^{25} = -26.6$  ( $c$  1,  $CHCl_3$ ); **IR**: ( $CHCl_3$ ,  $cm^{-1}$ ) 1764, 3449;  **$^1H$  NMR** (200 MHz,  $CDCl_3$ )  $\delta$  2.17-2.32 (m, 1H), 2.73 (dd,  $J = 10.2, 17.8$

Hz, 1H), 2.98 (dd,  $J = 8.9, 17.7$  Hz, 1H), 3.58-3.71 (m, 2H), 3.80 (s, 3H), 3.89-3.97 (m, 1H), 4.47 (m, 1H), 6.88 (d,  $J = 8.6$  Hz, 2H), 7.17 (d,  $J = 8.7$  Hz, 2H);  $^{13}\text{C}$  NMR (50 MHz,  $\text{CDCl}_3$ ):  $\delta$  37.33, 41.25, 55.19, 61.67, 87.33, 114.51, 128.23, 131.06, 159.05, 176.15; HRMS ( $m/z$ ): calculated  $[\text{M}+\text{H}]^+$  for  $\text{C}_{12}\text{H}_{15}\text{O}_4$  : 223.0965 found: 223.0964; **Optical purity**: 97% ee determined by HPLC analysis (Chiral OJ-H column, *n*-hexane/ 2-propanol (50:50), 0.5 mL/min, 254 nm) Retention time:  $t_{\text{minor}} = 13.27$  and  $t_{\text{major}} = 14.03$  min.

**(R)-methyl 3-(4-methoxyphenyl)-3-((S)-oxiran-2-yl)propano- ate (9e)**

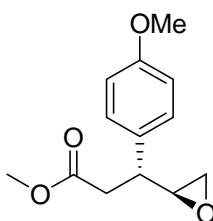

**Yield**: 47%, colorless liquid;  $[\alpha]_{\text{D}}^{25} = -25.0$  ( $c$  1,  $\text{CHCl}_3$ ); **IR**: ( $\text{CHCl}_3$ ,  $\text{cm}^{-1}$ ) 1735;  $^1\text{H}$  NMR (200 MHz,  $\text{CDCl}_3$ )  $\delta$  2.56 (dd,  $J = 2.5, 4.8$  Hz, 1H), 2.70-3.08 (m, 5H), 3.6 (s, 3H), 3.79 (s, 3H), 6.84 (d,  $J = 8.6$  Hz, 2H), 7.15 (d,  $J = 8.7$  Hz, 2H);  $^{13}\text{C}$  NMR (50 MHz,  $\text{CDCl}_3$ ):  $\delta$  37.41, 44.04, 46.82, 51.48, 55.00, 55.30, 114.03, 128.54, 131.70, 158.68, 171.86; HRMS ( $m/z$ ): calculated  $[\text{M}+\text{H}]^+$  for  $\text{C}_{13}\text{H}_{17}\text{O}_4$  : 237.1121 found: 237.1119; **Optical purity**: 96% ee determined by HPLC analysis (OD-H column, *n*-hexane/ 2-propanol (90:10), 0.5 mL/min, 254 nm) Retention time:  $t_{\text{minor}} = 14.90$  and  $t_{\text{major}} = 15.54$  min.

**(4R, 5R)-5-(hydroxymethyl)-4-methyldihydrofuran-2(3H)-one (8f)**

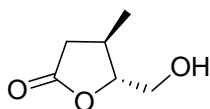

**Yield:** 46%, colorless liquid;  $[\alpha]_{\text{D}}^{25} = -51.0$  ( $c$  1,  $\text{CHCl}_3$ ) {lit.<sup>1</sup>  $[\alpha]_{\text{D}}$  +49.4 for its antipode }; **IR:** ( $\text{CHCl}_3$ ,  $\text{cm}^{-1}$ ) 1770, 3419;  **$^1\text{H NMR}$**  (200 MHz,  $\text{CDCl}_3$ )  $\delta$  1.17 (d,  $J = 6.6$  Hz, 3H), 2.16 (br s, 1H), 2.21 (dd,  $J = 8.6, 16.8$  Hz, 1H), 2.43-2.65 (m, 1H), 2.76 (dd,  $J = 8.5, 16.8$  Hz, 1H), 3.61-3.72 (m, 1H), 3.87-3.97 (m, 1H), 4.13 (m, 1H);  **$^{13}\text{C NMR}$**  (50 MHz,  $\text{CDCl}_3$ ):  $\delta$  17.67, 30.88, 36.80, 62.10, 87.46, 177.07; **Anal.** Calcd for  $\text{C}_6\text{H}_{10}\text{O}_3$  requires C, 55.37; H, 7.74; found C, 55.39; H, 7.80%. **Optical purity:** 97% determine from Mosher's ester.

### Synthesis of Mosher's Ester

**(2R)-((2R,3R)-tetrahydro-3-methyl-5-oxofuran-2-yl)methyl 3,3,3-trifluoro-2-methoxy-2-phenylpropanoate:**

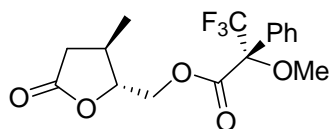

To a stirred solution of **8f** (50 mg, 0.38 mmol), DCC (95 mg, 0.46 mmol) and catalytic *N,N*-diaminopyridine (5 mg, 10 mol%), Mosher's acid [(*R*)-(+)- $\alpha$ -Methoxy- $\alpha$ -trifluoromethylphenyl acetic acid] (108 mg, 0.46mmol) in  $\text{CH}_2\text{Cl}_2$  (2 mL) was added at 0 °C and allowed to stir for 2 h at same temperature. After the completion of reaction (monitored by TLC), it was quenched with water and extracted with  $\text{CH}_2\text{Cl}_2$  (2 x 3 mL). The combined organic extracts were washed with brine, dried over anhydrous  $\text{Na}_2\text{SO}_4$  and concentrated under reduced pressure to give the crude product corresponding Mosher's ester. Column chromatographic purification with silica gel using petroleum ether: ethyl acetate (7:3) as eluent gave to give pure corresponding Mosher's ester.

**Yield:** 68%, colorless liquid,  $^1\text{H NMR}$  (400 MHz,  $\text{CDCl}_3$ )  $\delta$  1.17 (d,  $J = 6.8$  Hz, 3H), 2.16 (dd,  $J = 8.3, 17.3$  Hz, 1H), 2.34 (m, 1H), 2.64 (dd,  $J = 8.5, 17.6$  Hz, 1H), 3.53 (s, 3H), 4.25 (m, 1H), 4.39 (dd,  $J = 5.3, 12.3$  Hz, 1H), 4.57 (dd,  $J = 2.8, 12.1$  Hz, 1H), 7.41 (m, 3H), 7.51 (m, 2H);  $^{19}\text{F NMR}$  (400 MHz,  $\text{CDCl}_3 + \text{CF}_3\text{COOH}$ )  $\delta$  -72.17 (minor diastereomer, integral = 1%), -72.27 (major diastereomer, integral = 58.46%) [Ratio of diastereomer major : minor, 98.32 : 1.68]

**(S)-methyl 3-((S)-oxiran-2-yl)butanoate (9f)**

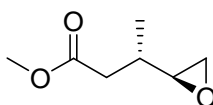

**Yield:** 48%, colorless liquid;  $[\alpha]_D^{25} = +3.5$  ( $c$  1,  $\text{CHCl}_3$ ) {lit.<sup>2</sup>  $[\alpha]_D^{25} +3.8$  ( $c$  2,  $\text{CHCl}_3$ )};  
**IR:** ( $\text{CHCl}_3$ ,  $\text{cm}^{-1}$ ) 1737;  $^1\text{H NMR}$  (200 MHz,  $\text{CDCl}_3$ )  $\delta$  1.03 (d,  $J = 6.9$  Hz, 3H), 1.86 (m, 1H), 2.27 (dd,  $J = 8.2, 15.2$  Hz, 1H), 2.50-2.60 (m, 2H), 2.73-2.84 (m, 2H), 3.69 (s, 3H);  
 $^{13}\text{C NMR}$  (50 MHz,  $\text{CDCl}_3$ ):  $\delta$  15.66, 33.24, 38.05, 46.11, 51.33, 55.43, 172.35; **Anal.**  
Calcd for  $\text{C}_7\text{H}_{12}\text{O}_3$  requires C, 58.32; H, 8.39; found C, 58.28; H, 8.42%.

**Optical purity:** 96% determine from Mosher's ester (Note: epoxide **9f** was opened with water using non-chiral way then corresponding lactone is used for the preparation of corresponding Mosher's ester).

**(2R)-((2S,3S)-tetrahydro-3-methyl-5-oxofuran-2-yl)methyl 3,3,3-trifluoro-2-methoxy-2-phenylpropanoate:**

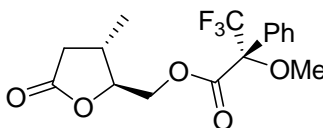



**Yield:** 56%, colorless liquid,  $^1\text{H NMR}$  (400 MHz,  $\text{CDCl}_3$ )  $\delta$  1.16 (d,  $J = 6.8$  Hz, 3H), 2.13 (dd,  $J = 7.8, 17.6$  Hz, 1H), 2.30 (m, 1H), 2.57 (dd,  $J = 8.5, 17.3$  Hz, 1H), 3.54 (s, 3H), 4.27 (m, 1H), 4.34 (dd,  $J = 4.3, 12.3$  Hz, 1H), 4.61 (dd,  $J = 2.5, 12.1$  Hz, 1H), 7.41 (m, 3H), 7.50 (m, 2H);  $^{19}\text{F NMR}$  (400 MHz,  $\text{CDCl}_3 + \text{CF}_3\text{COOH}$ )  $\delta$  -72.26 (major diastereomer, integral = 51.56%), -72.36 (minor diastereomer, integral = 1%) [Ratio of diastereomer major : minor, 98.10 : 1.90].

**(4R, 5R)-4-benzyl-5-(hydroxymethyl)dihydrofuran-2(3H)-one (8g)**

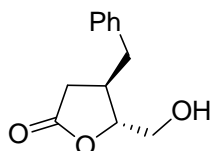

**Yield:** 47%, colorless thick liquid;  $[\alpha]_{\text{D}}^{25} = -38.0$  ( $c$  1,  $\text{CHCl}_3$ ); **IR:** ( $\text{CHCl}_3$ ,  $\text{cm}^{-1}$ ) 1773, 3421;  $^1\text{H NMR}$  (200 MHz,  $\text{CDCl}_3$ )  $\delta$  2.12 (t,  $J = 6.6$  Hz, 1H), 2.26-2.42 (m, 1H), 2.64-2.86 (m, 4H), 3.40-3.52 (m, 1H), 3.72-3.83 (m, 1H), 4.28 (m, 1H), 7.13-7.18 (m, 2H), 7.23-7.36 (m, 3H);  $^{13}\text{C NMR}$  (50 MHz,  $\text{CDCl}_3$ ):  $\delta$  34.90, 37.50, 39.19, 62.83, 85.33, 126.70, 128.68, 138.10, 176.80; **HRMS** ( $m/z$ ): calculated  $[\text{M}+\text{H}]^+$  for  $\text{C}_{12}\text{H}_{15}\text{O}_3$  : 207.1016 found: 207.1014; **Optical purity:** 99% ee determined by HPLC analysis (Chiral OD-H column,  $n$ -hexane/ 2-propanol (50:50), 0.5 mL/min, 254 nm) Retention time:  $t_{\text{major}} = 9.94$  and  $t_{\text{minor}} = 11.41$  min.

**(S)-methyl 3-((S)-oxiran-2-yl)-4-phenylbutanoate (9g)**

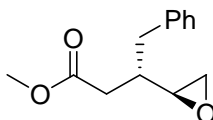

**Yield:** 48%, colorless liquid;  $[\alpha]_{\text{D}}^{25} = -3.0$  ( $c$  1,  $\text{CHCl}_3$ ); **IR:** ( $\text{CHCl}_3$ ,  $\text{cm}^{-1}$ ) 1737;  **$^1\text{H}$  NMR** (200 MHz,  $\text{CDCl}_3$ )  $\delta$  2.01 (m, 1H), 2.26 (dd,  $J = 2.7, 4.8$  Hz, 1H), 2.32-2.56 (m, 2H), 2.60-2.89 (m, 4H), 3.67 (s, 3H), 7.14-7.31 (m, 5H);  **$^{13}\text{C}$  NMR** (50 MHz,  $\text{CDCl}_3$ ):  $\delta$  35.89, 37.55, 40.47, 47.01, 51.42, 54.20, 126.28, 128.31, 129.01, 138.89, 172.37; **HRMS** ( $m/z$ ): calculated  $[\text{M}+\text{H}]^+$  for  $\text{C}_{13}\text{H}_{17}\text{O}_3$  : 221.1172 found: 221.1172; **Optical purity:** 97% ee determined by HPLC analysis (OD-H column,  $n$ -hexane/ 2-propanol (90:10), 0.5 mL/min, 254 nm) Retention time:  $t_{\text{minor}} = 13.08$  and  $t_{\text{major}} = 13.56$  min.

**(4R, 5R)-5-(hydroxymethyl)-4-phenethyldihydrofuran-2(3H)-one (8h)**

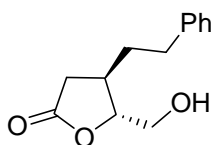

**Yield:** 48%, colorless thick liquid;  $[\alpha]_{\text{D}}^{25} = -54.8$  ( $c$  1,  $\text{CHCl}_3$ ); **IR:** ( $\text{CHCl}_3$ ,  $\text{cm}^{-1}$ ) 1772, 3440;  **$^1\text{H}$  NMR** (200 MHz,  $\text{CDCl}_3$ ) 1.69-2.00 (m, 2H), 2.19-2.31 (m, 2H), 2.36-2.54 (m, 1H), 2.62-2.81 (m, 3H), 3.57-3.68 (m, 1H), 3.86-3.93 (m, 1H), 4.23 (m, 1H), 7.12-7.33 (m, 5H);  **$^{13}\text{C}$  NMR** (50 MHz,  $\text{CDCl}_3$ ):  $\delta$  33.71, 35.14, 35.21, 35.85, 62.89, 85.93, 126.26, 128.19, 128.57, 140.68, 176.77; **HRMS** ( $m/z$ ): calculated  $[\text{M}+\text{H}]^+$  for  $\text{C}_{13}\text{H}_{17}\text{O}_3$  : 221.1172 found: 221.1169; **Optical purity:** 96% ee determined by HPLC analysis (Chiral OD-H column,  $n$ -hexane/ 2-propanol (50:50), 0.5 mL/min, 254 nm) Retention time:  $t_{\text{major}} = 13.45$  and  $t_{\text{minor}} = 14.48$  min.

**(S)-methyl 3-((S)-oxiran-2-yl)-5-phenylpentanoate (9h)**

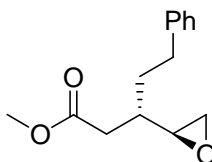

**Yield:** 48%, colorless liquid;  $[\alpha]_D^{25} = -5.9$  ( $c$  1,  $\text{CHCl}_3$ ); **IR:** ( $\text{CHCl}_3$ ,  $\text{cm}^{-1}$ ) 1743;  **$^1\text{H}$  NMR** (200 MHz,  $\text{CDCl}_3$ )  $\delta$  1.77 (m, 3H), 2.34-2.87 (m, 7H), 3.68 (s, 3H), 7.14-7.30 (m, 5H);  **$^{13}\text{C}$  NMR** (50 MHz,  $\text{CDCl}_3$ ):  $\delta$  33.01, 33.25, 36.48, 38.18, 47.18, 51.42, 54.52, 125.91, 128.11, 128.33, 141.42, 172.43; **HRMS ( $m/z$ ):** calculated  $[\text{M}+\text{H}]^+$  for  $\text{C}_{14}\text{H}_{19}\text{O}_3$ : 235.1329 found: 235.1329; **Optical purity:** 96% ee determined by HPLC analysis (OD-H column, *n*-hexane/ 2-propanol (90:10), 0.5 mL/min, 254 nm) Retention time:  $t_{\text{minor}} = 14.79$  and  $t_{\text{major}} = 15.35$  min.

**(4S, 5S)-4-(4-fluorophenyl)-5-(hydroxymethyl)dihydrofuran-2(3H)-one (11b)**

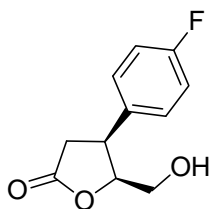

**Yield:** 46%, colorless solid m.p.: 113 °C;  $[\alpha]_D^{25} = -156.12$  ( $c$  1,  $\text{CHCl}_3$ ); **IR:** ( $\text{CHCl}_3$ ,  $\text{cm}^{-1}$ ) 1774, 3415;  **$^1\text{H}$  NMR** (200 MHz,  $\text{CDCl}_3$ )  $\delta$  2.15 (br s, 1H), 2.84 (dd,  $J = 9.1, 17.3$  Hz, 1H), 3.01 (dd,  $J = 8.7, 17.3$  Hz, 1H), 3.33-3.44 (m, 1H), 3.51-3.62 (m, 1H), 3.88 (q,  $J = 8.6$  Hz, 1H), 4.74 (m, 1H), 7.01-7.09 (m, 2H), 7.21-7.28 (m, 2H);  **$^{13}\text{C}$  NMR** (50 MHz,  $\text{CDCl}_3$ ):  $\delta$  34.81, 42.82, 61.94, 83.12, 115.81 (d,  $J = 21.6$  Hz), 129.38 (d,  $J = 7.7$  Hz), 132.16 (d,  $J = 3.1$  Hz), 162.26 (d,  $J = 247.4$  Hz), 176.34; **HRMS ( $m/z$ ):** calculated  $[\text{M}+\text{H}]^+$  for  $\text{C}_{11}\text{H}_{12}\text{FO}_3$ : 211.0765 found: 211.0766; **Optical purity:** 98% ee determined by HPLC (OJ-H column, *n*-hexane/ 2-propanol (50:50), 0.5 mL/min, 254 nm) Retention time:  $t_{\text{major}} = 10.83$  and  $t_{\text{minor}} = 18.58$  min.

**(R)-methyl 3-(4-fluorophenyl)-3-((R)-oxiran-2-yl)propanoate (12b)**

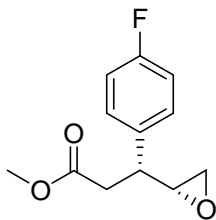

**Yield:** 48%, colorless liquid;  $[\alpha]_D^{25} = +10.4$  (*c* 1, CHCl<sub>3</sub>); **IR:** (CHCl<sub>3</sub>, cm<sup>-1</sup>) 1736; **<sup>1</sup>H NMR** (200 MHz, CDCl<sub>3</sub>)  $\delta$  2.43 (dd, *J* = 2.5, 4.8 Hz, 1H), 2.56-2.82 (m, 3H), 3.09-3.15 (m, 1H), 3.24-3.34 (m, 1H), 3.63 (s, 3H), 6.95-7.04 (m, 2H), 7.16-7.26 (m, 2H); **<sup>13</sup>C NMR** (50 MHz, CDCl<sub>3</sub>):  $\delta$  36.71, 42.22, 45.69, 51.63, 54.36, 115.60 (d, *J* = 21.2 Hz), 129.51 (d, *J* = 8.1 Hz), 135.04 (d, *J* = 3.3 Hz), 162.00 (d, *J* = 245.9 Hz), 171.62; **HRMS** (*m/z*): calculated [M+H]<sup>+</sup> for C<sub>12</sub>H<sub>14</sub>FO<sub>3</sub> : 225.0921 found: 225.0921; **Optical purity:** 98% ee determined by HPLC analysis (OD-H column, *n*-hexane/ 2-propanol (90:10), 0.5 mL/min, 254 nm) Retention time: *t*<sub>minor</sub> = 12.77 and *t*<sub>major</sub> = 13.11 min.

**(4*S*, 5*S*)-4-(4-chlorophenyl)-5-(hydroxymethyl)dihydrofuran-2(3*H*)-one (11c)**

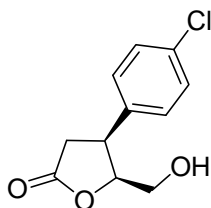

**Yield:** 47%, colorless solid m.p.: 108 °C;  $[\alpha]_D^{25} = -110.11$  (*c* 1, CHCl<sub>3</sub>); **IR:** (CHCl<sub>3</sub>, cm<sup>-1</sup>) 1775, 3436; **<sup>1</sup>H NMR** (200 MHz, CDCl<sub>3</sub>)  $\delta$  2.29 (t, *J* = 6.3 Hz, 1H), 2.86 (dd, *J* = 9.1, 17.3 Hz, 1H), 3.00 (dd, *J* = 8.7, 17.3 Hz, 1H), 3.36 (m, 1H), 3.57 (m, 1H), 3.87 (q, *J* = 8.6 Hz, 1H), 4.75 (m, 1H), 7.19 (d, *J* = 8.5 Hz, 2H), 7.32 (d, *J* = 8.6 Hz, 2H); **<sup>13</sup>C NMR** (50 MHz, CDCl<sub>3</sub>):  $\delta$  34.53, 42.74, 61.66, 83.28, 128.95, 129.15, 133.55, 134.92, 176.87; **HRMS** (*m/z*): calculated [M+H]<sup>+</sup> for C<sub>11</sub>H<sub>12</sub>ClO<sub>3</sub> : 227.0469 found: 227.0470; **Optical**

**purity:** 99% ee determined by (OJ-H column, *n*-hexane/ 2-propanol (50:50), 0.5 mL/min, 254 nm) Retention time:  $t_{\text{major}} = 10.99$  and  $t_{\text{minor}} = 12.08$  min.

**(*R*)-methyl 3-(4-chlorophenyl)-3-((*R*)-oxiran-2-yl)propanoate (12c)**

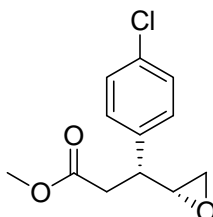

**Yield:** 46%, colorless liquid;  $[\alpha]_{\text{D}}^{25} = +9.4$  ( $c$  1,  $\text{CHCl}_3$ ); **IR:** ( $\text{CHCl}_3$ ,  $\text{cm}^{-1}$ ) 1736;  **$^1\text{H}$  NMR** (200 MHz,  $\text{CDCl}_3$ )  $\delta$  2.44 (dd,  $J = 2.6, 4.8$  Hz, 1H), 2.57-2.83 (m, 3H), 3.10-3.16 (m, 1H), 3.23-3.33 (m, 1H), 3.63 (s, 3H), 7.17 (d,  $J = 8.5$  Hz, 2H), 7.29 (d,  $J = 8.6$  Hz, 2H);  **$^{13}\text{C}$  NMR** (50 MHz,  $\text{CDCl}_3$ ):  $\delta$  36.56, 42.40, 45.76, 51.71, 54.25, 128.71, 129.30, 133.11, 137.79, 171.58; **HRMS** ( $m/z$ ): calculated  $[\text{M}+\text{H}]^+$  for  $\text{C}_{12}\text{H}_{14}\text{ClO}_3$ : 241.0626 found: 241.0626; **Optical purity:** 97% ee determined by HPLC analysis (OD-H column, *n*-hexane/ 2-propanol (90:10), 0.5 mL/min, 254 nm) Retention time:  $t_{\text{minor}} = 13.15$  and  $t_{\text{major}} = 13.54$  min.

**(4*S*, 5*S*)-4-(4-bromophenyl)-5-(hydroxymethyl)dihydrofuran-2(3*H*)-one (11d)**

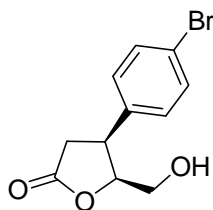

**Yield:** 46%, colorless thick liquid;  $[\alpha]_{\text{D}}^{25} = -108.8$  ( $c$  1,  $\text{CHCl}_3$ ); **IR:** ( $\text{CHCl}_3$ ,  $\text{cm}^{-1}$ ) 1773, 3440;  **$^1\text{H}$  NMR** (200 MHz,  $\text{CDCl}_3$ )  $\delta$  2.13 (br s, 1H), 2.83 (dd,  $J = 9.0, 17.2$  Hz, 1H), 3.01 (dd,  $J = 8.7, 17.3$  Hz, 1H), 3.40 (m, 1H), 3.57 (m, 1H), 3.86 (q,  $J = 8.6$  Hz, 1H), 4.74

(m, 1H), 7.15 (d,  $J = 8.5$  Hz, 2H), 7.49 (d,  $J = 8.5$  Hz, 2H);  $^{13}\text{C}$  NMR (50 MHz,  $\text{CDCl}_3$ ):  $\delta$  34.54, 43.03, 61.85, 82.92, 121.88, 129.54, 132.08, 135.48, 176.27; HRMS ( $m/z$ ): calculated  $[\text{M}+\text{H}]^+$  for  $\text{C}_{11}\text{H}_{12}\text{BrO}_3$ : 270.9964 found: 270.9965; **Optical purity**: 98% ee determined by HPLC analysis (OJ-H column, *n*-hexane/ 2-propanol (50:50), 0.5 mL/min, 254 nm) Retention time:  $t_{\text{major}} = 12.33$  and  $t_{\text{minor}} = 13.41$  min.

**(R)-methyl 3-(4-bromophenyl)-3-((R)-oxiran-2-yl)propanoate (12d)**

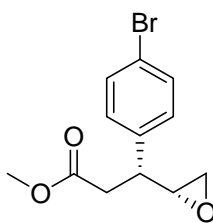

**Yield**: 48%, colorless liquid;  $[\alpha]_{\text{D}}^{25} = +8.8$  ( $c$  1,  $\text{CHCl}_3$ ); **IR**: ( $\text{CHCl}_3$ ,  $\text{cm}^{-1}$ ) 1735;  $^1\text{H}$  NMR (200 MHz,  $\text{CDCl}_3$ )  $\delta$  2.44 (dd,  $J = 2.6, 4.9$  Hz, 1H), 2.56-2.82 (m, 3H), 3.10-3.16 (m, 1H), 3.21-3.31 (m, 1H), 3.63 (s, 3H), 7.11 (d,  $J = 8.5$  Hz, 2H), 7.44 (d,  $J = 8.5$  Hz, 2H);  $^{13}\text{C}$  NMR (50 MHz,  $\text{CDCl}_3$ ):  $\delta$  36.50, 42.47, 45.74, 51.69, 54.17, 121.24, 129.68, 131.67, 138.34, 171.52; HRMS ( $m/z$ ): calculated  $[\text{M}+\text{H}]^+$  for  $\text{C}_{12}\text{H}_{14}\text{BrO}_3$ : 285.0121 found: 285.0121; **Optical purity**: 97% ee determined by HPLC analysis (OD-H column, *n*-hexane/ 2-propanol (90:10), 0.5 mL/min, 254 nm) Retention time:  $t_{\text{minor}} = 14.36$  and  $t_{\text{major}} = 15.09$  min.

**(4*S*, 5*S*)-4-benzyl-5-(hydroxymethyl)dihydrofuran-2(3*H*)-one (8i)**

(Synthesized using (*R,R*)-Co(III)-salen complex)

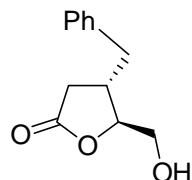

**Yield:** 48%, colorless thick liquid;  $[\alpha]_{\text{D}}^{25} = +38.2$  ( $c$  1,  $\text{CHCl}_3$ ); **Optical purity:** 99% ee determined by HPLC analysis (Chiral OD-H column, *n*-hexane/ 2-propanol (50:50), 0.5 mL/min, 254 nm) Retention time:  $t_{\text{minor}} = 9.82$  and  $t_{\text{major}} = 11.34$  min.

**(*R*)-methyl 3-((*R*)-oxiran-2-yl)-4-phenylbutanoate (9i)**

(Synthesized using (*R,R*)-Co(III)-salen complex)

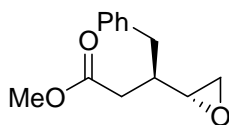

**Yield:** 45%, colorless liquid;  $[\alpha]_{\text{D}}^{25} = +3.1$  ( $c$  1,  $\text{CHCl}_3$ ); **Optical purity:** 98% ee determined by (OD-H column, *n*-hexane/ 2-propanol (90:10), 0.5 mL/min, 254 nm) Retention time:  $t_{\text{major}} = 13.01$  and  $t_{\text{minor}} = 13.50$  min.

## 2.2 ((2*R*, 3*S*)-3-(4-fluorophenyl)-5-oxotetrahydrofuran-2-yl)methyl methanesulfonate (**17**)

To a solution of lactone **8b/8i** (4.76 mmol) in CH<sub>2</sub>Cl<sub>2</sub> (15 mL), triethyl amine ( 0.86 mL, 6.19 mmol) and Mesyl chloride (0.44 mL, 5.71 mmol) was added at 0 °C under nitrogen atmosphere. The resulting solution was stirred at same temperature for 1 h. After the completion of the reaction (monitored by TLC), it was quenched with water and extracted with CH<sub>2</sub>Cl<sub>2</sub> (3 x 10 mL). The combined organic extracts were washed with brine, dried over anhydrous Na<sub>2</sub>SO<sub>4</sub> and concentrated under reduced pressure to give the crude product **17/17a**. Column chromatographic purification with silica gel using petroleum ether: ethyl acetate (7:3) as eluent gave **17/17a** in pure form.

### ((2*S*, 3*S*)-3-benzyl-5-oxotetrahydrofuran-2-yl)methyl methanesulfonate (**17a**)

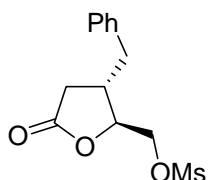

**Yield:** 93%, colorless solid m.p.: 78 °C;  $[\alpha]_D^{25} = +26.0$  (*c* 1, CHCl<sub>3</sub>); **IR:** (CHCl<sub>3</sub>, cm<sup>-1</sup>) 1782; **<sup>1</sup>H NMR** (200 MHz, CDCl<sub>3</sub>) δ 2.27-2.42 (m, 1H), 2.63-2.85 (m, 4H), 2.99 (s, 3H), 4.05 (dd, *J* = 4.7, 11.7 Hz, 1H), 4.23 (dd, *J* = 2.7, 11.7 Hz, 1H), 4.43 (m, 1H), 7.14-7.35 (m, 5H); **<sup>13</sup>C NMR** (50 MHz, CDCl<sub>3</sub>): δ 34.29, 37.45, 38.02, 38.95, 69.01, 81.05, 127.05, 128.67, 128.91, 137.48, 174.82; **HRMS (*m/z*):** calculated [M+H]<sup>+</sup> for C<sub>13</sub>H<sub>17</sub>O<sub>5</sub>S : 285.0791 found: 285.0790.



### 2.3 (4*S*, 5*R*)-5-(azidomethyl)-4-(4-fluorophenyl)dihydrofuran-2(3*H*)-one (18)

To a stirred mixture of crude **17/17a** (3.47 mmol) in DMF (10 mL), sodium azide (0.27 g, 4.16 mmol) was added. Reaction mixture was stirred for 8 h at 80 °C. After the completion of the reaction (monitored by TLC), it was extracted with EtOAc (3 x 10 mL), washed with water, brine and dried over anhydrous Na<sub>2</sub>SO<sub>4</sub>. The combined organic layer was concentrated under reduced pressure to give the crude azido lactone **18/18a**, which was purified by column chromatography with silica gel using petroleum ether: ethyl acetate (8:2) as eluent gave pure **18/18a** as colorless oil.

### (4*S*, 5*S*)-5-(azidomethyl)-4-benzylidihydrofuran-2(3*H*)-one (18a)

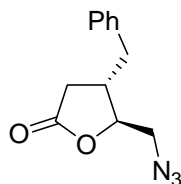

**Yield:** 95%, colorless liquid;  $[\alpha]_D^{25} = +78.5$  (*c* 1, CHCl<sub>3</sub>); **IR:** (CHCl<sub>3</sub>, cm<sup>-1</sup>) 1781, 2104; **<sup>1</sup>H NMR** (200 MHz, CDCl<sub>3</sub>) δ 2.26-2.42 (m, 1H), 2.66-2.86 (m, 4H), 3.16 (dd, *J* = 4.6, 13.4 Hz, 1H), 3.45 (dd, *J* = 3.4, 13.3 Hz, 1H), 4.33 (m, 1H), 7.13-7.17(m, 2H), 7.25-7.37 (m, 3H); **<sup>13</sup>C NMR** (50 MHz, CDCl<sub>3</sub>): δ 34.52, 38.91, 39.11, 53.06, 82.40, 126.99, 128.59, 128.85, 137.66, 174.83; **HRMS (*m/z*):** calculated [M+H]<sup>+</sup> for C<sub>12</sub>H<sub>14</sub>N<sub>3</sub>O<sub>2</sub> : 232.1081 found: 232.1080.

### 2.4 (4*S*, 5*R*)-4-(4-fluorophenyl)-5-hydroxypiperidin-2-one (19)

To a solution of **18/18a** (4.25 mmol) in dry methanol Pd(OH)<sub>2</sub> (0.05 g) was added and the reaction mixture was stirred under an atmosphere of H<sub>2</sub> (1 atm) for 24 h at 25 °C. After the completion of the reaction (monitored by TLC), the reaction mixture was filtered over

celite and the filtrate was concentrated under reduced pressure to provide the **19/19a**, which was purified by column chromatography using ethyl acetate: methanol (9:1) to obtain pure **19/19a**.

**(4*S*, 5*S*)-4-benzyl-5-hydroxypiperidin-2-one (19a)**

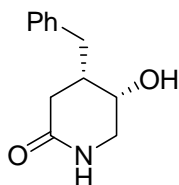

**Yield:** 92%, colorless solid m.p.: 213 °C;  $[\alpha]_D^{25} = +7.3$  (*c* 1, MeOH); **IR:** (CHCl<sub>3</sub>, cm<sup>-1</sup>) 1642, 3440; **<sup>1</sup>H NMR** (200 MHz, MeOH-d<sub>4</sub> + CDCl<sub>3</sub>) δ 2.03-2.24 (m, 3H), 2.51 (dd, *J* = 6.8, 13.1 Hz, 1H), 2.71 (dd, *J* = 7.0, 13.0 Hz, 1H), 3.21 (m, 2H), 3.75 (s, 1H), 7.08-7.20 (m, 5H); **<sup>13</sup>C NMR** (50 MHz, CDCl<sub>3</sub>): δ 33.54, 38.92, 40.36, 49.99, 64.66, 127.38, 129.61, 130.30, 141.08, 174.68; **HRMS** (*m/z*): calculated [M+H]<sup>+</sup> for C<sub>12</sub>H<sub>16</sub>NO<sub>2</sub> : 206.1176 found: 206.1177.

**2.5 (3*R*, 4*S*)-1-benzyl-4-(4-fluorophenyl)piperidin-3-ol (20)**

To a solution of lactum **19** (0.5 g, 2.39 mmol) in dry THF (10 mL), BH<sub>3</sub>·SMe<sub>2</sub> (0.45 mL, 4.78 mmol) was added dropwise at 0 °C under nitrogen atmosphere and the mixture was then refluxed for 6 h. After the completion of the reaction (monitored by TLC), the solvent (THF) was removed under reduced pressure. Without purification, the crude amino alcohol was then dissolved in CH<sub>2</sub>Cl<sub>2</sub>/H<sub>2</sub>O (1:1, 10 mL) and Na<sub>2</sub>CO<sub>3</sub> (0.75 g, 7.71 mmol) was added, followed by dropwise addition of benzyl bromide (0.34 mL, 2.87 mmol). The reaction mixture was refluxed for 8 h. After the completion of the reaction (monitored by TLC), it was extracted with CH<sub>2</sub>Cl<sub>2</sub> (3 x 5 mL), washed with water, brine and dried over

anhydrous Na<sub>2</sub>SO<sub>4</sub>. The combined organic layer was concentrated under reduced pressure to give the crude **20**, which was purified by column chromatographic purification with silica gel using petroleum ether: ethyl acetate (7:3) as eluent gave **20** in pure form.

#### **(3S, 4S)-4-benzylpiperidin-3-ol (4)**

To a solution of lactum **19a** (0.49 g, 2.39 mmol) in dry THF (10 mL), BH<sub>3</sub>·SMe<sub>2</sub> (0.45 mL, 4.78 mmol) was added dropwise at 0 °C under nitrogen atmosphere and the mixture was then refluxed for 6 h. After the completion of the reaction (monitored by TLC), the solvent (THF) was removed under reduced pressure to give the crude product **4**, which was purified by column chromatography with silica gel using petroleum ether: ethyl acetate (6:4) as eluent gave pure **4** as colorless solid.

#### **2.6 (S)-1-benzyl-4-(4-fluorophenyl)piperidin-3-one (21)**

To a stirred solution of oxalyl chloride (0.15 mL, 1.75 mmol) in dry CH<sub>2</sub>Cl<sub>2</sub> (3 mL), DMSO (0.2 mL, 2.63 mmol) was added at -78 °C under nitrogen atmosphere. The reaction mixture was stirred for 20 min. followed by the addition of a solution of alcohol **20** (0.25 g, 0.88 mmol) in CH<sub>2</sub>Cl<sub>2</sub> (1 mL). After stirring for 1 h at -78 °C, triethyl amine (0.5 mL, 3.5 mmol) was added and reaction mixture was stirred at room temperature for additional 15 min, after which it was quenched with H<sub>2</sub>O (5 mL). The organic phase was separated and the aqueous phase extracted with CH<sub>2</sub>Cl<sub>2</sub> (3 x 3 mL), the combined organic phase was dried over anhydrous Na<sub>2</sub>SO<sub>4</sub> and concentrated under reduced pressure to give the corresponding crude aldehyde **21**, which was used for next reaction without purification.

### 2.7 (S)-1-benzyl-4-(4-fluorophenyl)-3-(methoxymethylene)piperidine (**22**)

To a stirred solution of methoxymethyltriphenylphosphonium chloride (0.48 g, 1.41 mmol) in dry THF (3 mL), *n*-butyl lithium (1.6 M in hexane, 0.5 mL, 0.84 mmol) was added dropwise at 0 °C under nitrogen atmosphere. The resulting red solution was stirred at this temperature for 1 h, after which solution of **21** (0.2 g, 0.7 mmol) in THF (1.5 mL) was added dropwise and the reaction mixture was allowed to stirred for another 48 h at 0 °C. After the completion of the reaction (monitored by TLC), it was extracted with CH<sub>2</sub>Cl<sub>2</sub> (3 x 5 mL), washed with water, brine and dried over anhydrous Na<sub>2</sub>SO<sub>4</sub>. The combined organic layer was concentrated under reduced pressure to give the crude **22**, which upon column chromatographic purification with silica gel using petroleum ether: ethyl acetate (8:2) as eluent gave pure **22** as colorless oil.

(Spectral data is in good agreement with reported values, ref. 3)

### 2.8 ((3S, 4R)-1-benzyl-4-(4-fluorophenyl)piperidin-3-yl)methanol (**2**)

To a solution of enol ether **22** (0.06 g, 0.19 mmol) in THF (3 mL), 0.1 M aqueous H<sub>2</sub>SO<sub>4</sub> (2.8 mL, 0.28 mmol) was added. The solution was refluxed for 12 h, after which it was allowed to cool to room temperature and a saturated solution of NaHCO<sub>3</sub> (10 mL) was added. The resulting mixture was extracted with diethyl ether (3 x 5 mL), washed with water, brine and dried over anhydrous Na<sub>2</sub>SO<sub>4</sub>. The combined organic layer was concentrated under reduced pressure to give the corresponding crude aldehyde, which was used for next reaction without further purification.

To the solution of this crude aldehyde in methanol (2 mL), NaBH<sub>4</sub> (0.007 g, 0.21 mmol) was added at 0 °C and the stirred reaction mixture stirred for 1 h at 25 °C. After the completion of the reaction (monitored by TLC), it was treated with 2 N aq. Sodium hydroxide (5 mL) and extracted with CH<sub>2</sub>Cl<sub>2</sub> (3 x 5 mL), washed with water, brine and dried over anhydrous Na<sub>2</sub>SO<sub>4</sub>. The combined organic layer was concentrated under reduced pressure to give the crude **2**, which was purified by column chromatography with silica gel using petroleum ether: ethyl acetate (8:2) as eluent gave pure **2** as colorless oil.

(Spectral data and optical rotation are in good agreement with reported values, ref. 3, 4)

### **2.9 (+)-Eldanolide (1)**

To a stirred solution of CuBr.SMe<sub>2</sub> (0.128 g, 0.62 mmol, 30 mol %) in THF (5 mL), 2-methyl-1-propenylmagnesium bromide (0.5 M in THF, 10 mL, 5.2 mmol) was added at -20 °C under nitrogen atmosphere and stirring was continued for 30 min. The solution of epoxide **9f** (0.39 g, 2.08 mmol) in THF (5 mL) was added dropwise and the stirring continued for 3 h at -20 °C to 0 °C. Then the mixture was quenched with saturated aq. ammonium chloride solution (5 mL) and the product extracted with ethyl acetate (3 x 10 mL). The combined organic layers were washed with brine, dried over anhyd. Na<sub>2</sub>SO<sub>4</sub> and concentrated under reduced pressure to give crude product **1** which upon column chromatographic purification with silica gel using petroleum ether: ethyl acetate (9:1) as eluent gave pure **1** as colorless oil.

(Spectral data and optical rotation are in good agreement with reported values, ref. 5)

## 2.10 General procedure for the synthesis of acyclic olefinic acid (**14**)

A mixture of allylic alcohol **13** (37.31 mmol), triethyl orthoacetate (37.31 mmol) and hexanoic acid (0.23 mL, 1.85 mmol) was placed in a round-bottomed flask equipped with thermometer, Claisen head and condenser. The solution was heated with distillation of ethanol (upto 70-150 °C). After 3 h distillation of ethanol slows and another 0.1-mL portion of hexanoic acid was added. Additional portions (0.1 mL) of hexanoic acid were added again after at 3<sup>rd</sup> and 4<sup>th</sup> h followed by continued heating for next the next 6 h. After which it was allowed to cool and aq. solution of potassium hydroxide (2.9 g, 52.2 mmol, 20 ml), methanol (60 mL) was added. The resulting mixture was refluxed for 4 h and then allowed to cool to room temperature. After that the resulting solution washed with diethyl ether and acidified with dil HCl. The acidic solution was extracted with diethyl ether and the organic layer dried over anhydrous Na<sub>2</sub>SO<sub>4</sub> and concentrated under reduced pressure to give the crude product **14**. The crude material was used as such for next reaction without any further purification.

### 3-phenylpent-4-enoic acid (**14a**)

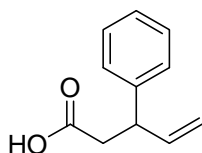

**Yield:** 90%, colorless solid m.p.: 48 °C; **IR:** (CHCl<sub>3</sub>, cm<sup>-1</sup>) 1638, 1708, 3028; **<sup>1</sup>H NMR** (200 MHz, CDCl<sub>3</sub>) δ 2.69 (dd, *J* = 7.5, 15.7 Hz, 1H), 2.82 (dd, *J* = 7.9, 15.7 Hz, 1H), 3.83 (q, *J* = 7.3 Hz, 1H), 5.04 (d, *J* = 5.5 Hz, 1H), 5.11 (s, 1H), 5.89-6.06 (m, 1H), 7.18-7.33 (m, 5H); **<sup>13</sup>C NMR** (50 MHz, CDCl<sub>3</sub>): δ 40.00, 45.13, 115.03, 126.80, 127.51, 128.63,

139.93, 142.07, 178.37; **Anal.** Calcd for C<sub>11</sub>H<sub>12</sub>O<sub>2</sub> requires C, 74.98; H, 6.86; found C, 74.70; H, 6.80%.

### 3-(4-fluorophenyl)pent-4-enoic acid (14b)

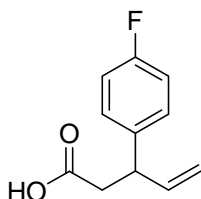

**Yield:** 88%, colorless solid m.p.: 82 °C; **IR:** (CHCl<sub>3</sub>, cm<sup>-1</sup>) 1509, 1710, 2912, 2987, 3035, 3076; **<sup>1</sup>H NMR** (200 MHz, CDCl<sub>3</sub>) δ 2.66 (dd, *J* = 7.7, 15.7 Hz, 1H), 2.81 (dd, *J* = 7.7, 15.7 Hz, 1H), 3.83 (q, *J* = 7.4 Hz, 1H), 5.01-5.12 (m, 2H), 5.86-6.03 (m, 1H), 6.94-7.02 (m, 2H), 7.13-7.20 (m, 2H); **<sup>13</sup>C NMR** (50 MHz, CDCl<sub>3</sub>): δ 40.06, 44.34, 115.18 (d, *J* = 4.7 Hz), 129.13 (d, *J* = 7.7 Hz), 137.72 (d, *J* = 3.3 Hz), 139.81, 164.16 (d, *J* = 245.0 Hz), 178.23; **Anal.** Calcd for C<sub>11</sub>H<sub>11</sub>O<sub>2</sub>F requires C, 68.03; H, 5.71; found C, 68.11; H, 5.75%.

### 3-(4-chlorophenyl)pent-4-enoic acid (14c)

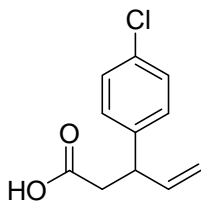

**Yield:** 85%, colorless solid m.p.: 100 °C; **IR:** (CHCl<sub>3</sub>, cm<sup>-1</sup>) 1496, 1707, 2610, 2905; **<sup>1</sup>H NMR** (200 MHz, CDCl<sub>3</sub>) δ 2.70 (dd, *J* = 7.7, 15.8 Hz, 1H), 2.81 (dd, *J* = 7.6, 14.4 Hz, 1H), 3.83 (q, *J* = 7.3 Hz, 1H), 5.02-5.13 (m, 2H), 5.85-6.02 (m, 1H), 7.13 (d, *J* = 8.5 Hz, 2H), 7.27 (d, *J* = 8.5 Hz, 2H); **<sup>13</sup>C NMR** (50 MHz, CDCl<sub>3</sub>): δ 39.83, 44.46, 115.45, 128.83, 128.95, 139.50, 140.48, 178.07; **Anal.** Calcd for C<sub>11</sub>H<sub>11</sub>O<sub>2</sub>Cl requires C, 62.72; H, 5.26; found C, 62.65; H, 5.18%.

### 3-(4-bromophenyl)pent-4-enoic acid (14d)

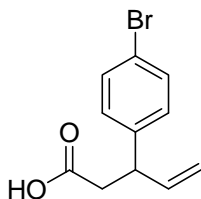

**Yield:** 84%, colorless solid m.p.: 108 °C; **IR:** (CHCl<sub>3</sub>, cm<sup>-1</sup>) 1706, 3044; **<sup>1</sup>H NMR** (200 MHz, CDCl<sub>3</sub>) δ 2.70 (dd, *J* = 7.7, 15.8 Hz, 1H), 2.81 (dd, *J* = 7.6, 15.8 Hz, 1H), 3.79 (q, *J* = 7.6 Hz, 1H), 5.02-5.13 (m, 2H), 5.84- 6.01 (m, 1H), 7.08 (d, *J* = 8.3 Hz, 2H), 7.42 (d, *J* = 8.3 Hz, 2H); **<sup>13</sup>C NMR** (50 MHz, CDCl<sub>3</sub>): δ 39.75, 44.51, 115.52, 120.78, 129.34, 131.78, 139.41, 140.99, 178.03; **Anal.** Calcd for C<sub>11</sub>H<sub>11</sub>O<sub>2</sub>Br requires C, 51.79; H, 4.35; found C, 51.68; H, 4.32%.

### 3-(4-methoxyphenyl)pent-4-enoic acid (14e)

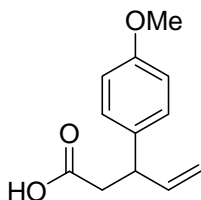

**Yield:** 88%, colorless solid m.p.: 78 °C; **IR:** (CHCl<sub>3</sub>, cm<sup>-1</sup>) 1512, 1610, 1708, 2836, 2956; **<sup>1</sup>H NMR** (200 MHz, CDCl<sub>3</sub>) δ 2.69 (dd, *J* = 7.5, 15.5 Hz, 1H), 2.75 (dd, *J* = 7.7, 15.4 Hz, 1H), 3.78 (s, 3H), 3.81 (m, 1H), 5.00-5.09 (m, 2H), 5.86-6.03 (m, 1H), 6.82 (d, *J* = 8.7 Hz, 2H), 7.11 (d, *J* = 8.6 Hz, 2H); **<sup>13</sup>C NMR** (50 MHz, CDCl<sub>3</sub>): δ 40.13, 44.31, 55.13, 114.02, 114.68, 128.49, 134.10, 140.29, 158.38, 178.37; **Anal.** Calcd for C<sub>12</sub>H<sub>14</sub>O<sub>3</sub> requires C, 69.88; H, 6.84; found C, 69.74; H, 6.94%.



### 3-methylpent-4-enoic acid (14f)

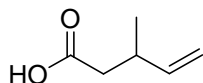

**Yield:** 78%, colorless liquid; **IR:** (CHCl<sub>3</sub>, cm<sup>-1</sup>) 1711, 2967, 3083; **<sup>1</sup>H NMR** (200 MHz, CDCl<sub>3</sub>) δ 1.10 (d, *J* = 6.7 Hz, 3H), 2.31 (dd, *J* = 7.6, 15.0 Hz, 1H), 2.39 (dd, *J* = 6.8, 15.2 Hz, 1H), 2.62-2.76 (m, 1H), 4.95-5.09 (m, 2H), 5.70-5.87 (m, 1H); **<sup>13</sup>C NMR** (50 MHz, CDCl<sub>3</sub>): δ 19.68, 34.09, 41.11, 113.66, 142.08, 179.24; **Anal.** Calcd for C<sub>6</sub>H<sub>10</sub>O<sub>2</sub> requires C, 63.14; H, 8.83; found C, 63.20; H, 8.75%.

### 3-benzylpent-4-enoic acid (14g)

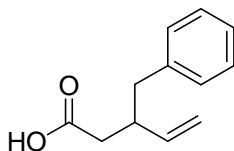

**Yield:** 92%, colorless liquid; **IR:** (CHCl<sub>3</sub>, cm<sup>-1</sup>) 1495, 1641, 1693, 2675, 3071; **<sup>1</sup>H NMR** (200 MHz, CDCl<sub>3</sub>) δ 2.33 (dd, *J* = 8.2, 15.5 Hz, 1H), 2.41 (dd, *J* = 5.7, 15.4 Hz, 1H), 2.67-2.95 (m, 3H), 4.96-5.05 (m, 2H), 5.64-5.82 (m, 1H), 7.12-7.31 (m, 5H); **<sup>13</sup>C NMR** (50 MHz, CDCl<sub>3</sub>): δ 38.56, 40.87, 41.32, 115.42, 126.27, 128.30, 129.28, 139.16, 139.93, 179.19; **Anal.** Calcd for C<sub>12</sub>H<sub>14</sub>O<sub>2</sub> requires C, 75.76; H, 7.42; found C, 75.72; H, 7.50%.

### 3-phenethylpent-4-enoic acid (14h)

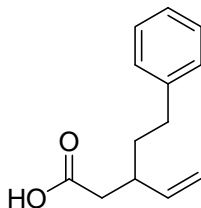

**Yield:** 85%, colorless liquid; **IR:** (CHCl<sub>3</sub>, cm<sup>-1</sup>) 1603, 1641, 1708, 3025; **<sup>1</sup>H NMR** (200 MHz, CDCl<sub>3</sub>) δ 1.64-1.80 (m, 2H), 2.34-2.43 (m, 2H), 2.51-2.68 (m, 3H), 5.07 (s, 1H), 5.15 (d, *J* = 3.9 Hz, 1H), 5.60-5.74 (m, 1H), 7.13-7.30 (m, 5H); **<sup>13</sup>C NMR** (50 MHz, CDCl<sub>3</sub>): δ 33.31, 36.15, 39.84, 39.91, 116.05, 125.84, 128.35, 140.25, 141.88, 178.96;  
**Anal.** Calcd for C<sub>13</sub>H<sub>16</sub>O<sub>2</sub> requires C, 76.44; H, 7.90; found C, 76.45; H, 7.95%.

### 2.11 General procedure for the synthesis of *trans*-iodolactone product (**15**)

To a solution of olefinic acid **14** (5.68 mmol) in acetonitrile (20 mL), solid I<sub>2</sub> (4.6 g, 18.17 mmol) was added at 0 °C under nitrogen atmosphere, the reaction mixture was protected from light and stirred for 24 h. After the completion of the reaction (monitored by TLC), it was quenched by addition of saturated solution of aq. NaHCO<sub>3</sub> followed by extraction with diethyl ether. Organic layer was separated and washed with 20% aq. Na<sub>2</sub>S<sub>2</sub>O<sub>3</sub> until colorless, dried over anhydrous Na<sub>2</sub>SO<sub>4</sub> and concentrated under reduced pressure to give the crude product **15**. Column chromatographic purification with silica gel using petroleum ether: ethyl acetate (8:2) as eluent gave **15** in pure form.

### 5-(iodomethyl)-4-phenyldihydrofuran-2(3*H*)-one (**15a**)

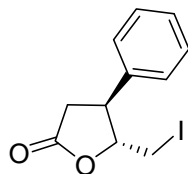

**Yield:** 89%, colorless thick liquid; **IR:** (CHCl<sub>3</sub>, cm<sup>-1</sup>) 1780; **<sup>1</sup>H NMR** (200 MHz, CDCl<sub>3</sub>) 2.82 (dd, *J* = 9.6, 17.9 Hz, 1H), 3.07 (dd, *J* = 9.01, 17.8 Hz, 1H), 3.34 (dd, *J* = 4.4, 11.2 Hz, 1H), 3.45-3.59 (m, 2H), 4.31 (m, 1H), 7.24-7.42 (m, 5H); **<sup>13</sup>C NMR** (50 MHz,

CDCl<sub>3</sub>):  $\delta$  6.33, 36.86, 47.19, 83.99, 127.13, 128.01, 129.25, 138.36, 174.08; **Anal.** Calcd for C<sub>11</sub>H<sub>11</sub>O<sub>2</sub>I requires C, 43.73; H, 3.67; found C, 43.72; H, 3.70%.

#### 4-(4-fluorophenyl)-5-(iodomethyl)dihydrofuran-2(3H)-one (15b)

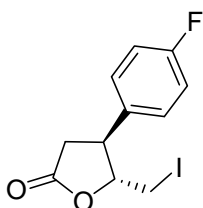

**Yield:** 82%, colorless thick liquid; **IR:** (CHCl<sub>3</sub>, cm<sup>-1</sup>) 1781; **<sup>1</sup>H NMR** (200 MHz, CDCl<sub>3</sub>)  $\delta$  2.76 (dd,  $J = 9.2, 17.81$  Hz, 1H), 3.07 (dd,  $J = 9.1, 17.9$  Hz, 1H), 3.29-3.60 (m, 3H), 4.27 (m, 1H), 7.03-7.12 (m, 2H), 7.21-7.28 (m, 2H); **<sup>13</sup>C NMR** (50 MHz, CDCl<sub>3</sub>):  $\delta$  1.14, 37.10, 43.36, 82.62, 116.17 (d,  $J = 21.6$  Hz), 129.78 (d,  $J = 8.1$  Hz), 132.28 (d,  $J = 3.3$  Hz), 162.0 (d,  $J = 248.1$  Hz), 175.19; **Anal.** Calcd for C<sub>11</sub>H<sub>10</sub>O<sub>2</sub>FI requires C, 41.27; H, 3.15; found C, 41.30; H, 3.12%.

#### 4-(4-chlorophenyl)-5-(iodomethyl)dihydrofuran-2(3H)-one (15c)

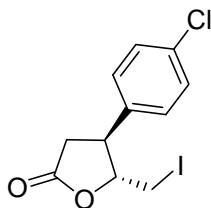

**Yield:** 80%, colorless thick liquid; **IR:** (CHCl<sub>3</sub>, cm<sup>-1</sup>) 1789; **<sup>1</sup>H NMR** (200 MHz, CDCl<sub>3</sub>)  $\delta$  2.75 (dd,  $J = 9.1, 17.8$  Hz, 1H), 3.07 (dd,  $J = 9.2, 17.9$  Hz, 1H), 3.29-3.59 (m, 3H), 4.28 (m, 1H), 7.20 (d,  $J = 8.5$  Hz, 2H), 7.36 (d,  $J = 8.6$  Hz, 2H); **<sup>13</sup>C NMR** (50 MHz, CDCl<sub>3</sub>):  $\delta$  5.99, 36.82, 46.62, 83.84, 128.52, 129.53, 134.05, 137.11, 173.73; **Anal.** Calcd for C<sub>11</sub>H<sub>10</sub>ClO<sub>2</sub>I requires C, 39.26; H, 2.99; found C, 39.28; H, 3.02%.

#### 4-(4-bromophenyl)-5-(iodomethyl)dihydrofuran-2(3H)-one (15d)

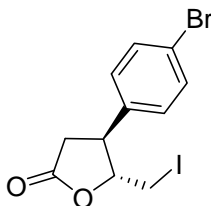

**Yield:** 82%, colorless thick liquid; **IR:** ( $\text{CHCl}_3$ ,  $\text{cm}^{-1}$ ) 1782;  **$^1\text{H NMR}$**  (200 MHz,  $\text{CDCl}_3$ )  $\delta$  2.75 (dd,  $J = 9.1, 17.8$  Hz, 1H), 3.07 (dd,  $J = 9.1, 17.8$  Hz, 1H), 3.29-3.58 (m, 3H), 4.28 (m, 1H), 7.15 (d,  $J = 8.5$  Hz, 2H), 7.51 (d,  $J = 8.5$  Hz, 2H);  **$^{13}\text{C NMR}$**  (50 MHz,  $\text{CDCl}_3$ ):  $\delta$  6.20, 36.65, 46.52, 83.60, 121.69, 128.86, 132.15, 137.29, 173.75; **Anal.** Calcd for  $\text{C}_{11}\text{H}_{10}\text{BrO}_2\text{I}$  requires C, 34.68; H, 2.65; found C, 34.70; H, 2.68%.

#### 5-(iodomethyl)-4-(4-methoxyphenyl)dihydrofuran-2(3H)-one (15e)

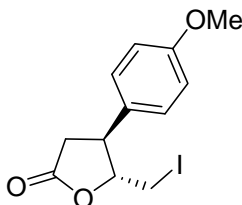

**Yield:** 85%, colorless thick liquid; **IR:** ( $\text{CHCl}_3$ ,  $\text{cm}^{-1}$ ) 1783;  **$^1\text{H NMR}$**  (200 MHz,  $\text{CDCl}_3$ )  $\delta$  2.64-2.84 (m, 1H), 2.97-3.10 (m, 1H), 3.28-3.54 (m, 3H), 3.81 (s, 3H), 4.24 (m, 1H), 6.89 (d,  $J = 8.7$  Hz, 2H), 7.17 (d,  $J = 8.7$  Hz, 2H);  **$^{13}\text{C NMR}$**  (50 MHz,  $\text{CDCl}_3$ ):  $\delta$  6.25, 36.93, 46.55, 55.16, 84.13, 114.55, 128.16, 130.00, 159.21, 174.07; **Anal.** Calcd for  $\text{C}_{12}\text{H}_{13}\text{O}_3\text{I}$  requires C, 43.39; H, 3.95; found C, 43.45; H, 3.88%.

### 5-(iodomethyl)-4-methyldihydrofuran-2(3H)-one (15f)

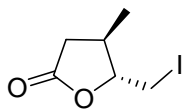

**Yield:** 80%, colorless liquid; **IR:** (CHCl<sub>3</sub>, cm<sup>-1</sup>) 1778; **<sup>1</sup>H NMR** (200 MHz, CDCl<sub>3</sub>) δ 1.24 (d, *J* = 6.6 Hz, 3H), 2.24 (dd, *J* = 7.8, 17.2 Hz, 1H), 2.34-2.55 (m, 1H), 2.81 (dd, *J* = 8.3, 17.1 Hz, 1H), 3.37 (m, 2H), 4.04 (q, *J* = 5.5 Hz, 1H); **<sup>13</sup>C NMR** (50 MHz, CDCl<sub>3</sub>): δ 6.00, 18.19, 35.75, 36.55, 84.45, 174.70; **Anal.** Calcd for C<sub>6</sub>H<sub>9</sub>O<sub>2</sub>I requires C, 30.02; H, 3.78; found C, 30.10; H, 3.82%.

### 4-benzyl-5-(iodomethyl)dihydrofuran-2(3H)-one (15g)

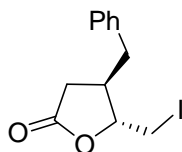

**Yield:** 85%, colorless solid m.p.: 62 °C; **IR:** (CHCl<sub>3</sub>, cm<sup>-1</sup>) 1782; **<sup>1</sup>H NMR** (200 MHz, CDCl<sub>3</sub>) δ 2.31-2.44 (m, 1H), 2.64-2.89 (m, 4H), 3.08 (dd, *J* = 4.4, 10.9 Hz, 1H), 3.27 (dd, *J* = 5.4, 10.9 Hz, 1H), 4.17 (q, *J* = 5.2 Hz, 1H), 7.15-7.38 (m, 5H); **<sup>13</sup>C NMR** (50 MHz, CDCl<sub>3</sub>): δ 7.26, 34.48, 39.25, 42.16, 82.24, 126.89, 128.61, 128.75, 137.58, 174.50; **Anal.** Calcd for C<sub>12</sub>H<sub>13</sub>O<sub>2</sub>I requires C, 45.59; H, 4.14; found C, 45.62; H, 4.20%.

### 5-(iodomethyl)-4-phenethyldihydrofuran-2(3H)-one (15h)

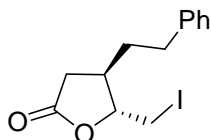

**Yield:** 82%, colorless thick liquid; **IR:** (CHCl<sub>3</sub>, cm<sup>-1</sup>) 1778; **<sup>1</sup>H NMR** (200 MHz, CDCl<sub>3</sub>) δ 1.64-2.07 (m, 2H), 2.23-2.41 (m, 2H), 2.55-2.88 (m, 3H), 3.26-3.42 (m, 2H), 4.15 (q, *J*

= 5.3 Hz, 1H), 7.13-7.33 (m, 5H);  $^{13}\text{C}$  NMR (50 MHz,  $\text{CDCl}_3$ ):  $\delta$  7.26, 34.48, 39.25, 42.16, 82.24, 126.89, 128.61, 128.75, 137.58, 174.50; **Anal.** Calcd for  $\text{C}_{13}\text{H}_{15}\text{O}_2\text{I}$  requires C, 47.29; H, 4.58; found C, 47.22; H, 4.50%.

## 2.12 General procedure for the synthesis of *cis*-iodolatone product (16)

To a solution of olefinic acid **14** (5.68 mmol) in chloroform (20 mL), aq.  $\text{NaHCO}_3$  (0.95 g, 11.36 mmol) in 20 mL of water, solid  $\text{I}_2$  (2.88 g, 11.36 mmol) was added at 0 °C under nitrogen atmosphere, the reaction mixture protected from light and stirred for 6 h. After the completion of the reaction (monitored by TLC), organic layer was separated and washed with 20% aq.  $\text{Na}_2\text{S}_2\text{O}_3$  until colorless, dried over anhydrous  $\text{Na}_2\text{SO}_4$  and concentrated under reduced pressure to give the crude product **16**. Column chromatographic purification with silica gel using petroleum ether: ethyl acetate (9:1) as eluent gave **16** in pure form.

### 5-(iodomethyl)-4-phenyldihydrofuran-2(3*H*)-one (16a)

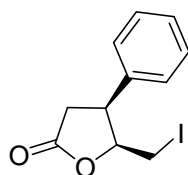

**Yield:** 80%, colorless solid m.p.: 104 °C; **IR:** ( $\text{CHCl}_3$ ,  $\text{cm}^{-1}$ ) 1782;  $^1\text{H}$  NMR (200 MHz,  $\text{CDCl}_3$ )  $\delta$  2.65-2.87 (m, 2H), 3.01-3.16 (m, 2H), 3.83-3.92 (m, 1H), 4.94 (m, 1H), 7.19-7.24 (m, 2H), 7.33-7.38 (m, 3H);  $^{13}\text{C}$  NMR (50 MHz,  $\text{CDCl}_3$ ):  $\delta$  1.51, 36.82, 44.05, 82.83, 128.02, 128.10, 128.96, 136.45, 175.37; **Anal.** Calcd for  $\text{C}_{11}\text{H}_{11}\text{O}_2\text{I}$  requires C, 43.73; H, 3.67; found C, 43.82; H, 3.75%.

#### 4-(4-fluorophenyl)-5-(iodomethyl)dihydrofuran-2(3H)-one (16b)

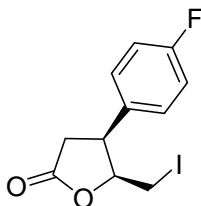

**Yield:** 76%, colorless solid m.p.: 99 °C; **IR:** (CHCl<sub>3</sub>, cm<sup>-1</sup>) 1785; **<sup>1</sup>H NMR** (200 MHz, CDCl<sub>3</sub>) δ 2.60-2.81 (m, 2H), 3.02-3.20 (m, 2H), 3.88 (m, 1H), 4.92 (m, 1H), 7.00-7.10 (m, 2H), 7.17-7.26 (m, 2H); **<sup>13</sup>C NMR** (50 MHz, CDCl<sub>3</sub>): δ 1.13, 37.08, 43.36, 86.62, 115.75 (d, *J* = 21.6 Hz), 129.78 (d, *J* = 8.1 Hz), 132.23 (d, *J* = 3.3 Hz), 162.33 (d, *J* = 248.1 Hz), 175.17; **Anal.** Calcd for C<sub>11</sub>H<sub>10</sub>O<sub>2</sub>FI requires C, 41.27; H, 3.15; found C, 41.18; H, 3.27%.

#### 4-(4-chlorophenyl)-5-(iodomethyl)dihydrofuran-2(3H)-one (16c)

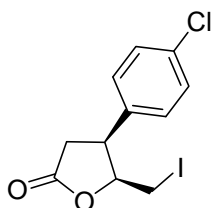

**Yield:** 75%, colorless thick liquid; **IR:** (CHCl<sub>3</sub>, cm<sup>-1</sup>) 1780; **<sup>1</sup>H NMR** (200 MHz, CDCl<sub>3</sub>) δ 2.60-2.81 (m, 2H), 3.02-3.21 (m, 2H), 3.86 (m, 1H), 4.92 (m, 1H), 7.17 (d, *J* = 8.5 Hz, 2H), 7.34 (d, *J* = 8.6 Hz, 2H); **<sup>13</sup>C NMR** (50 MHz, CDCl<sub>3</sub>): δ 1.06, 36.95, 43.50, 82.47, 129.17, 129.41, 134.12, 134.96, 175.07; **Anal.** Calcd for C<sub>11</sub>H<sub>10</sub>ClO<sub>2</sub>I requires C, 39.26; H, 2.99; found C, 3.28; H, 2.84%.

#### 4-(4-bromophenyl)-5-(iodomethyl)dihydrofuran-2(3H)-one (**16d**)

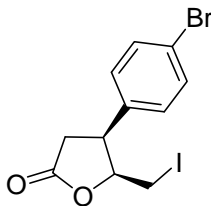

**Yield:** 71%, colorless thick liquid; **IR:** (CHCl<sub>3</sub>, cm<sup>-1</sup>) 1782; **<sup>1</sup>H NMR** (200 MHz, CDCl<sub>3</sub>) δ 2.60-2.81 (m, 2H), 3.02-3.21 (m, 2H), 3.85 (m, 1H), 4.92 (m, 1H), 7.11 (d, *J* = 8.5 Hz, 2H), 7.48 (d, *J* = 8.5 Hz, 2H); **<sup>13</sup>C NMR** (50 MHz, CDCl<sub>3</sub>): δ 1.19, 36.79, 43.51, 82.34, 122.12, 129.68, 132.05, 135.43, 175.07; **Anal.** Calcd for C<sub>11</sub>H<sub>10</sub>BrO<sub>2</sub>I requires C, 34.68; H, 2.65; found C, 3.58; H, 2.74%.

#### 2.13 General procedure for the synthesis of *anti* and *syn* epoxy esters (**7a-h** & **10 a-d**)

To a solution of iodolactone **15** or **16** (3.3 mmol) in methanol (15 mL) finely powdered anhydrous Na<sub>2</sub>CO<sub>3</sub> (0.38 g, 3.63 mmol) was added and the reaction mixture refluxed for 8 h under nitrogen atmosphere. After the completion of the reaction (monitored by TLC), the resulting reaction mixture was concentrated under reduced pressure and partitioned between 50 mL water and 50 mL diethyl ether. The organic layer was dried over anhydrous Na<sub>2</sub>SO<sub>4</sub> and concentrated under reduced pressure to give the corresponding crude product **7** or **10**. Column chromatographic purification with silica gel using petroleum ether: ethyl acetate (9:1) as eluent gave **7** or **10** pure in form.



### 3. Referances releveant to supporting information:

1. H.-J. Ha, K.-N. Yoon, S.-Y. Lee, Y.-S. Park, M.-S. Lim and Y.-G. Yim, *J. Org. Chem.*, 1998, **63**, 8062.
2. J. S. Yadav and P. S. R. Reddy, *Synthesis*, 2007, 1070.
3. Koech, P. K.; Krische, M. J. *Tetrahedron*, **2006**, *62*, 10594.
4. Bower, J. F.; Riis-Johannessen, T.; Szeto, P.; Whitehead, A. J.; Gallagher, T. *Chem. Commun.*, **2007**, 728.
5. Kong, L.; Zhuang, Z.; Chen, Q.; Deng, H.; Tang, Z.; Jia, X.; Li, Y.; Zhai, H. *Tetrahedron: Asymmetry*, **2007**, *18*, 451.

## 4. Spectra

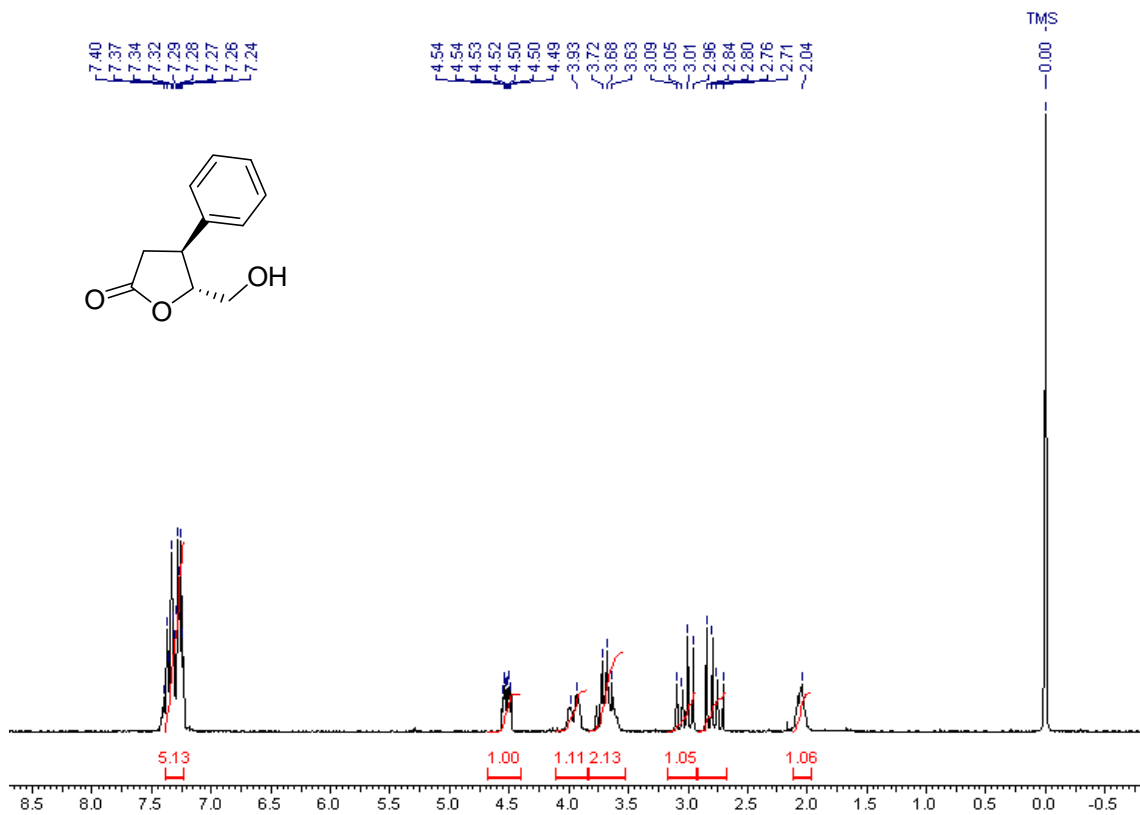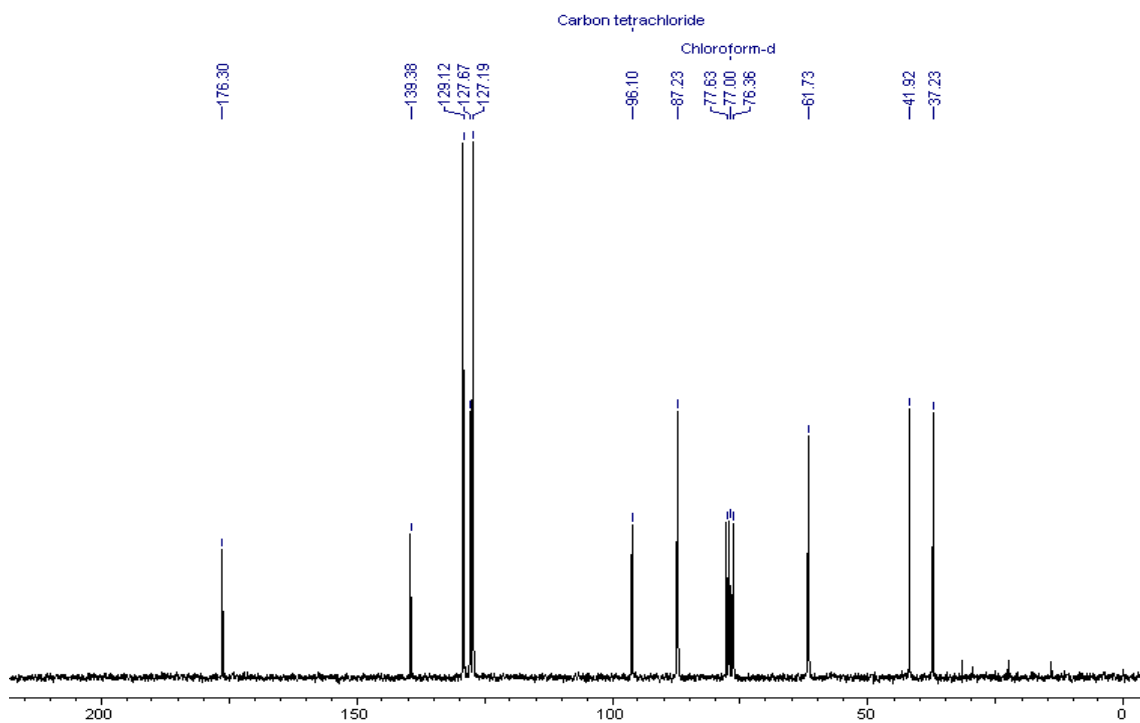

**(4*S*,5*R*)-5-(hydroxymethyl)-4-phenylidihydrofuran-2(3*H*)-one (8a)**

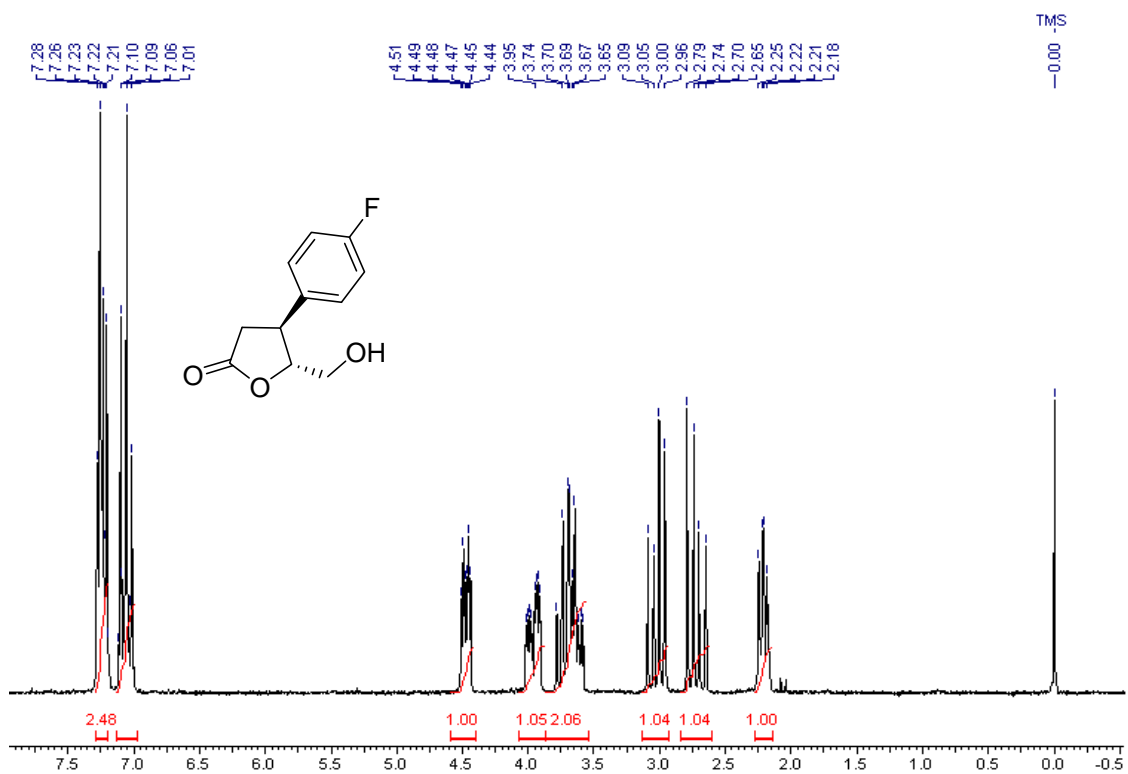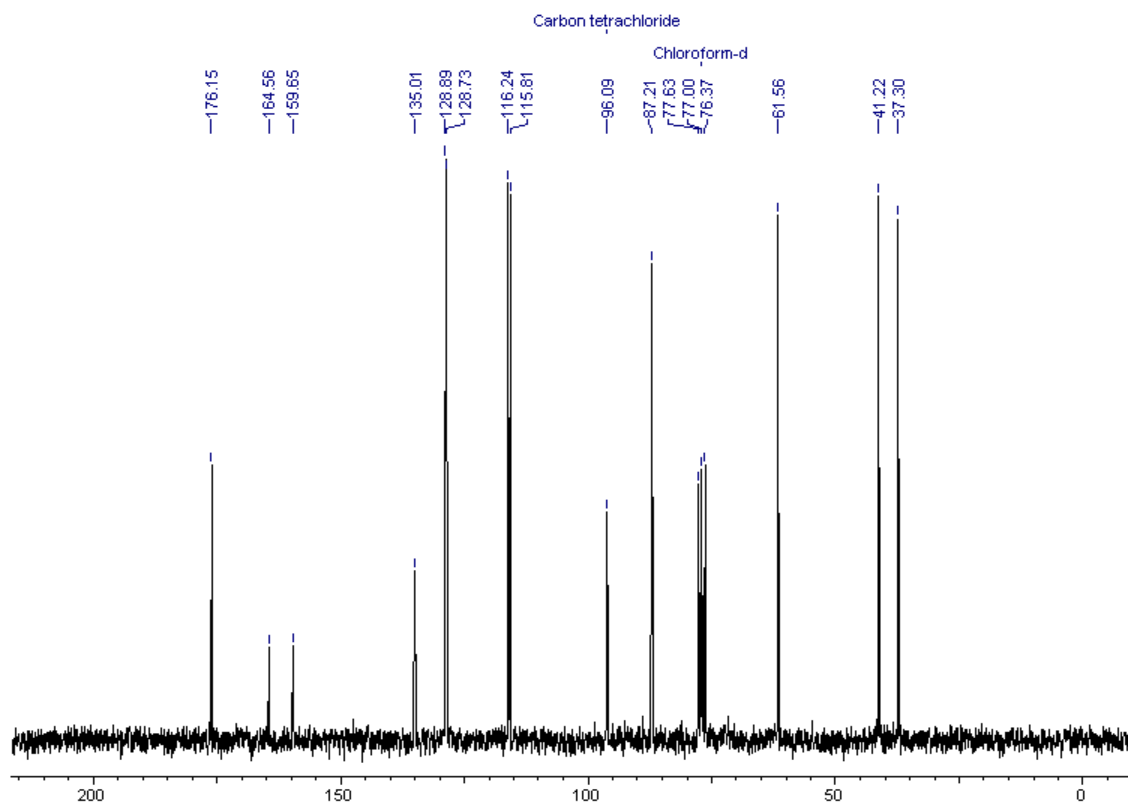

**(4*S*,5*R*)-4-(4-fluorophenyl)-5-(hydroxymethyl)dihydrofuran-2(3*H*)-one (8b)**

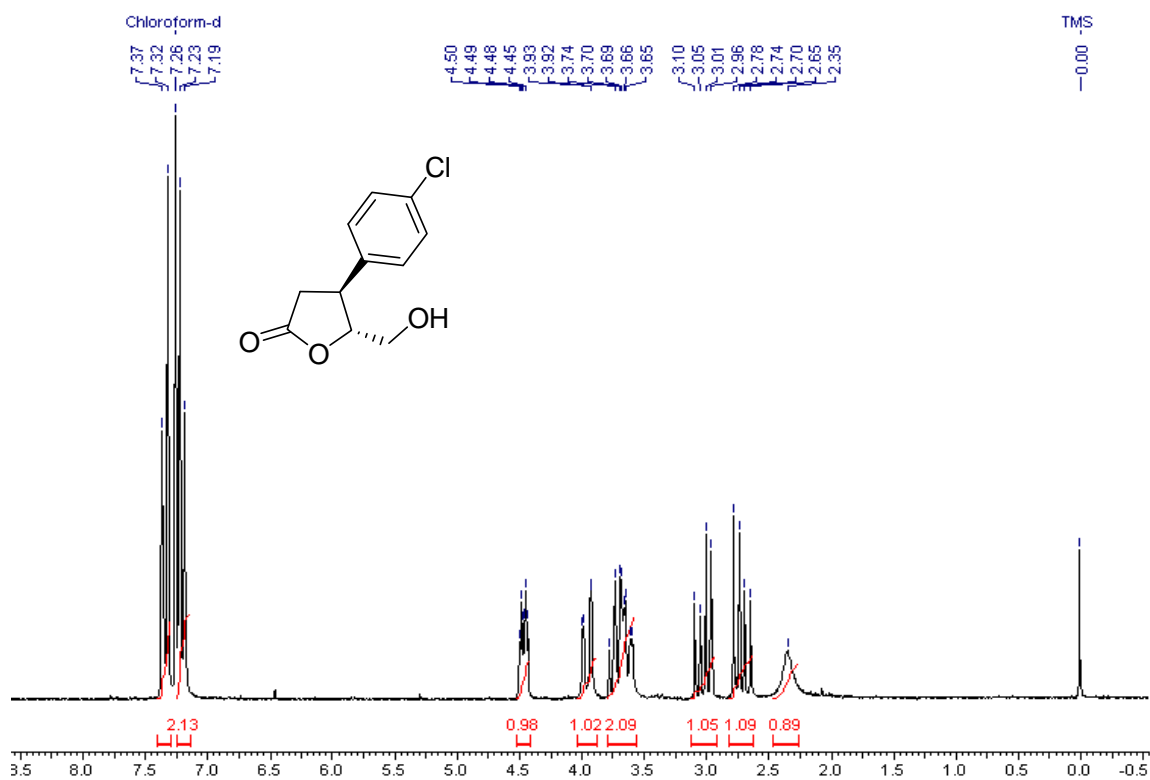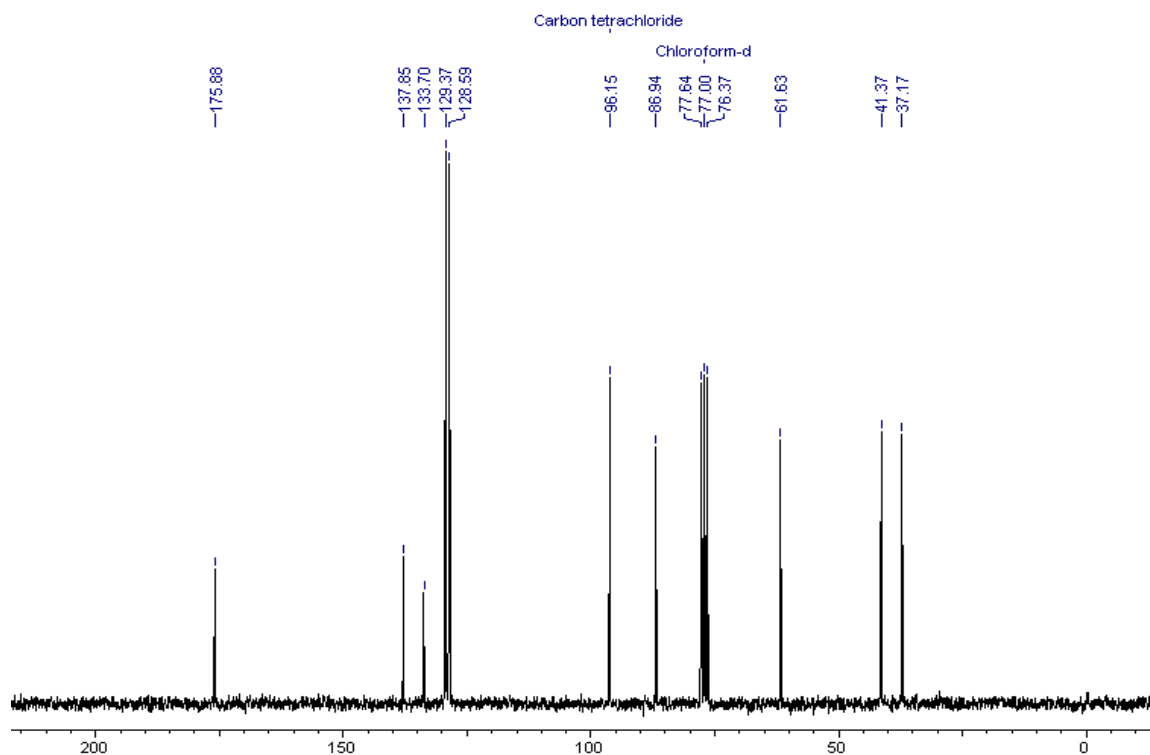

(4*S*,5*R*)-4-(4-chlorophenyl)-5-(hydroxymethyl)dihydrofuran-2(3*H*)-one (8c)

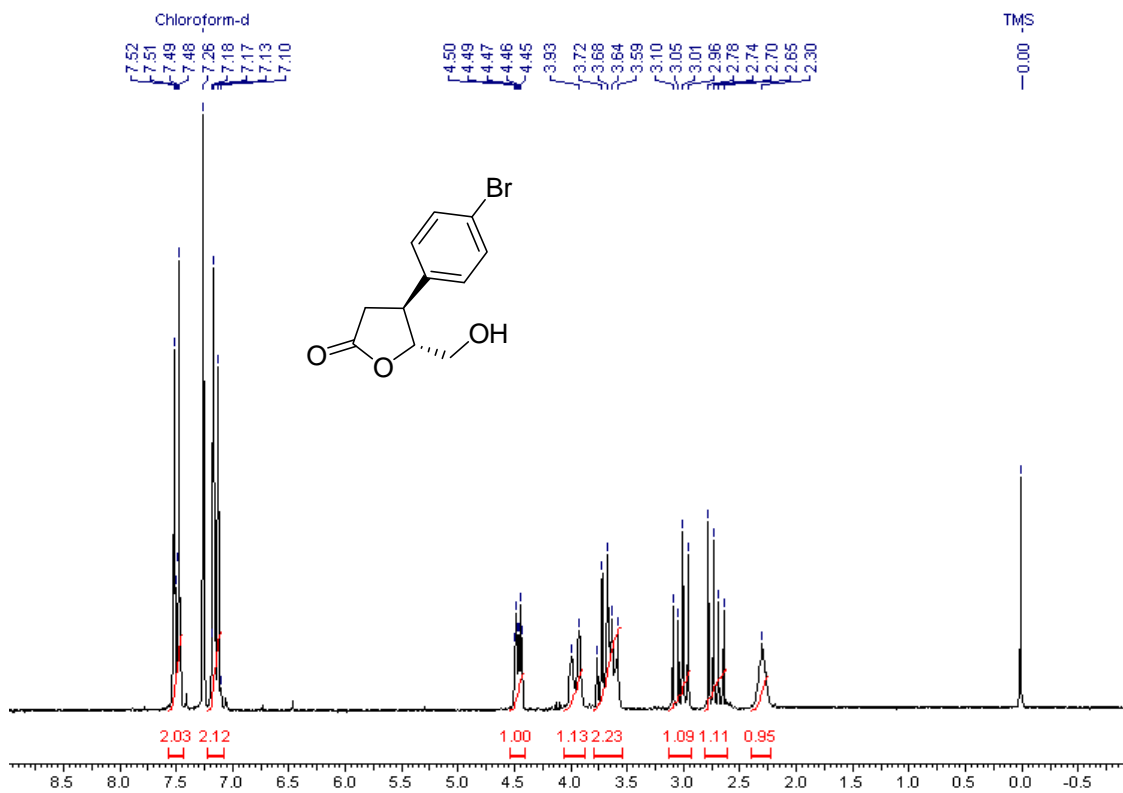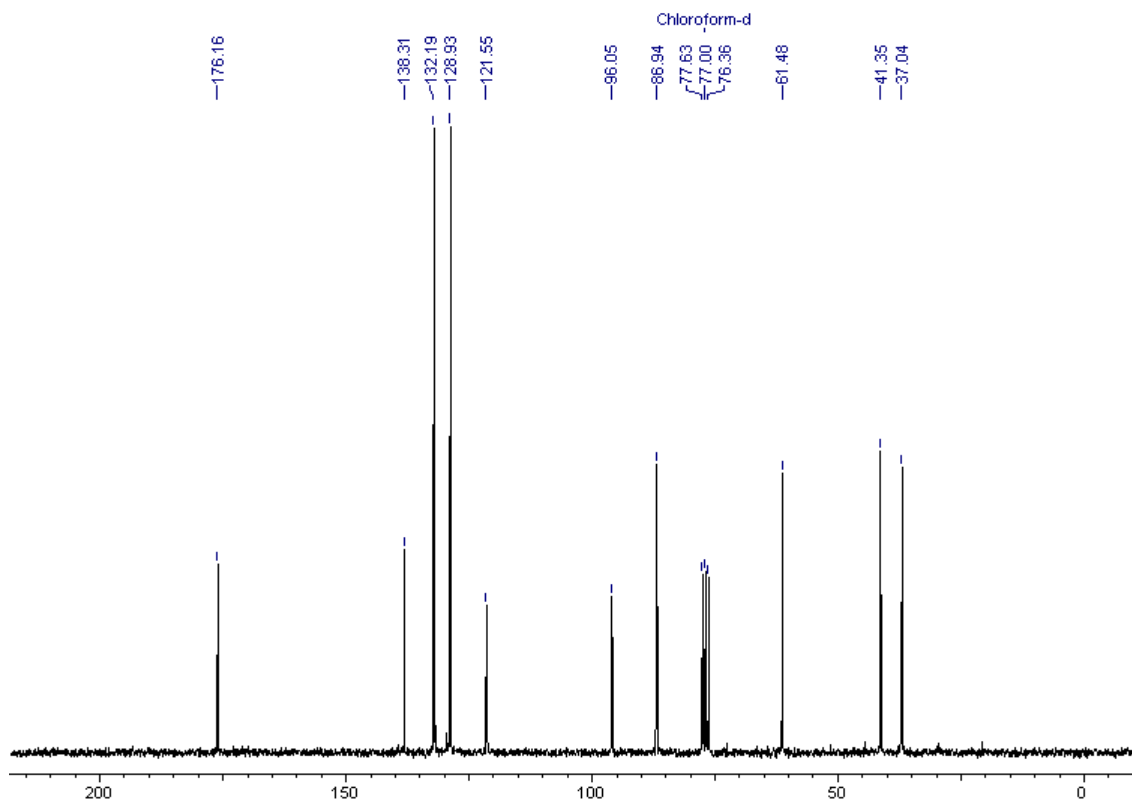

**(4*S*,5*R*)-4-(4-bromophenyl)-5-(hydroxymethyl)dihydrofuran-2(3*H*)-one (8d)**

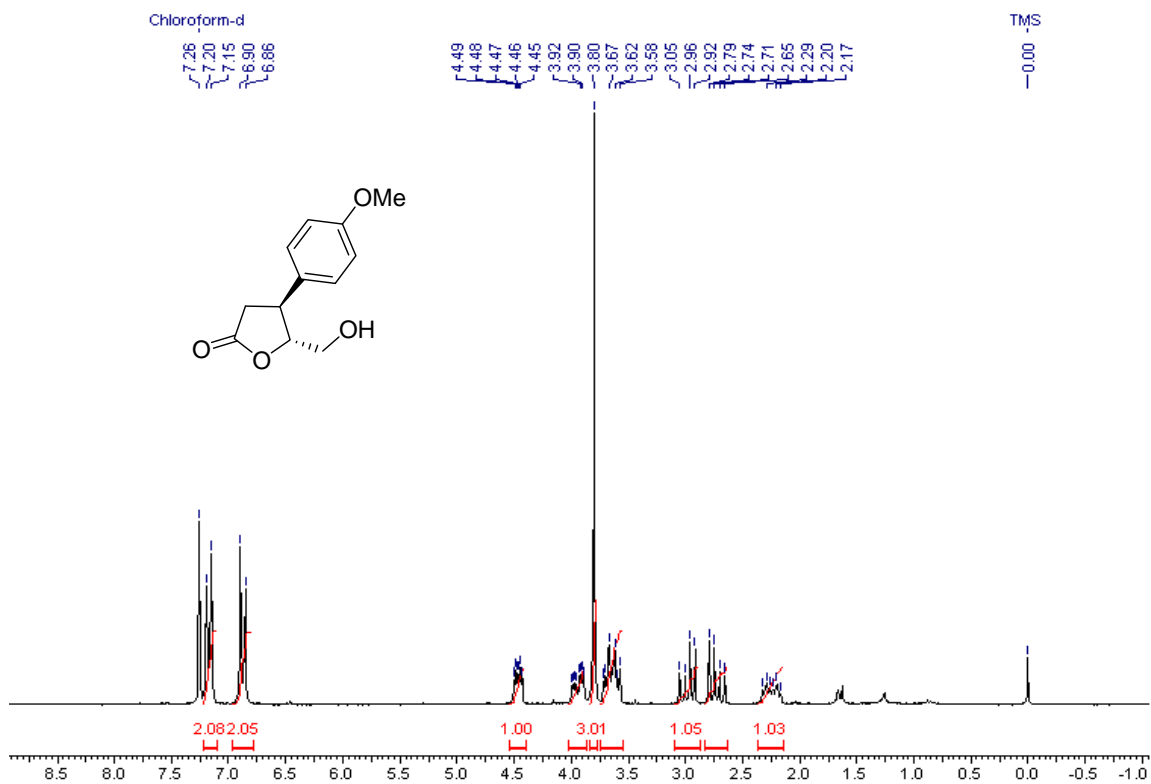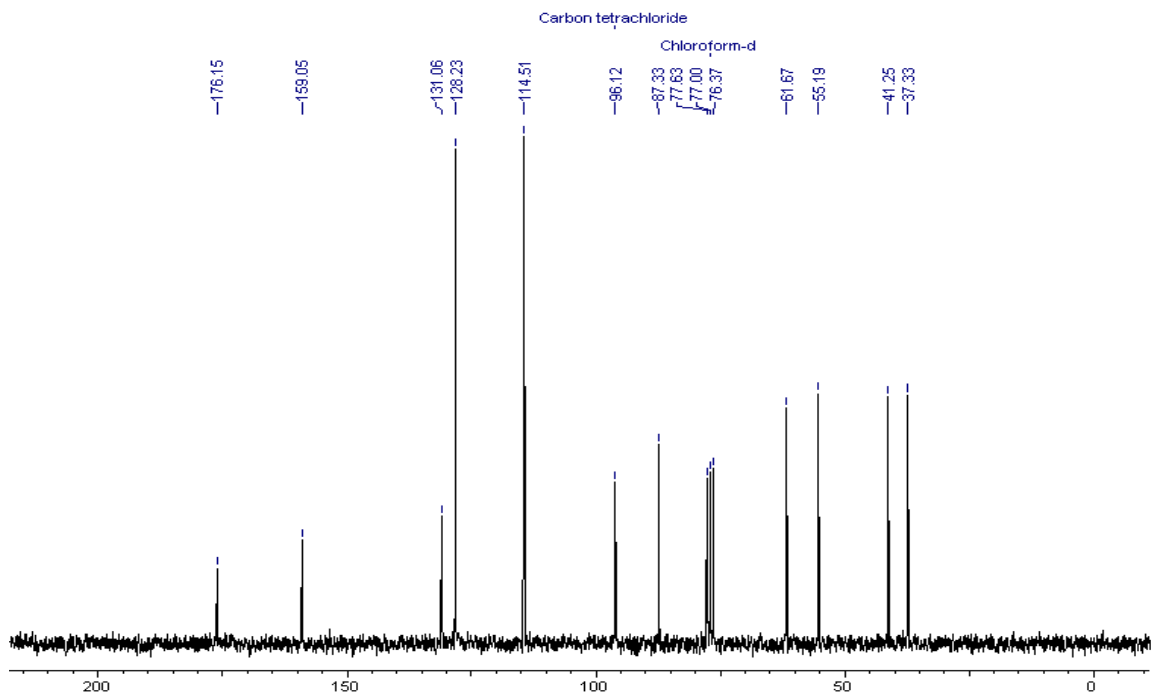

**(4S,5R)-5-(hydroxymethyl)-4-(4-methoxyphenyl)dihydrofuran-2(3H)-one (8e)**

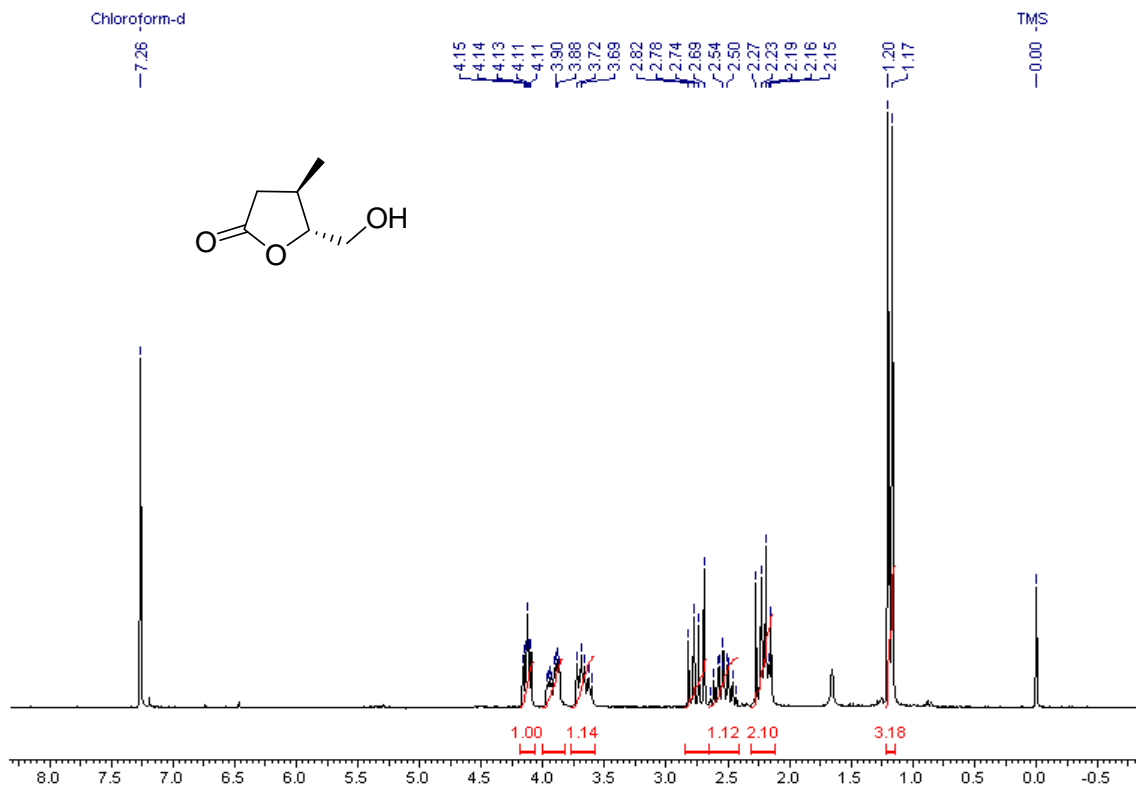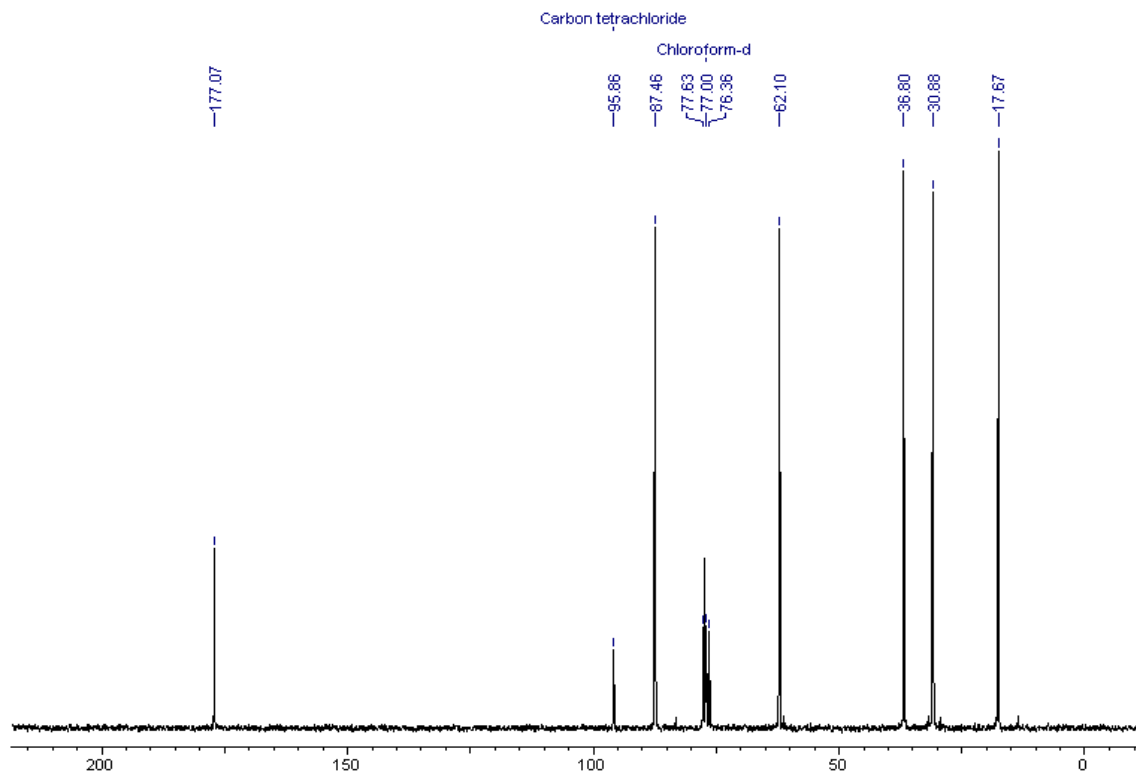

**(4R,5R)-5-(hydroxymethyl)-4-methyldihydrofuran-2(3H)-one (8f)**

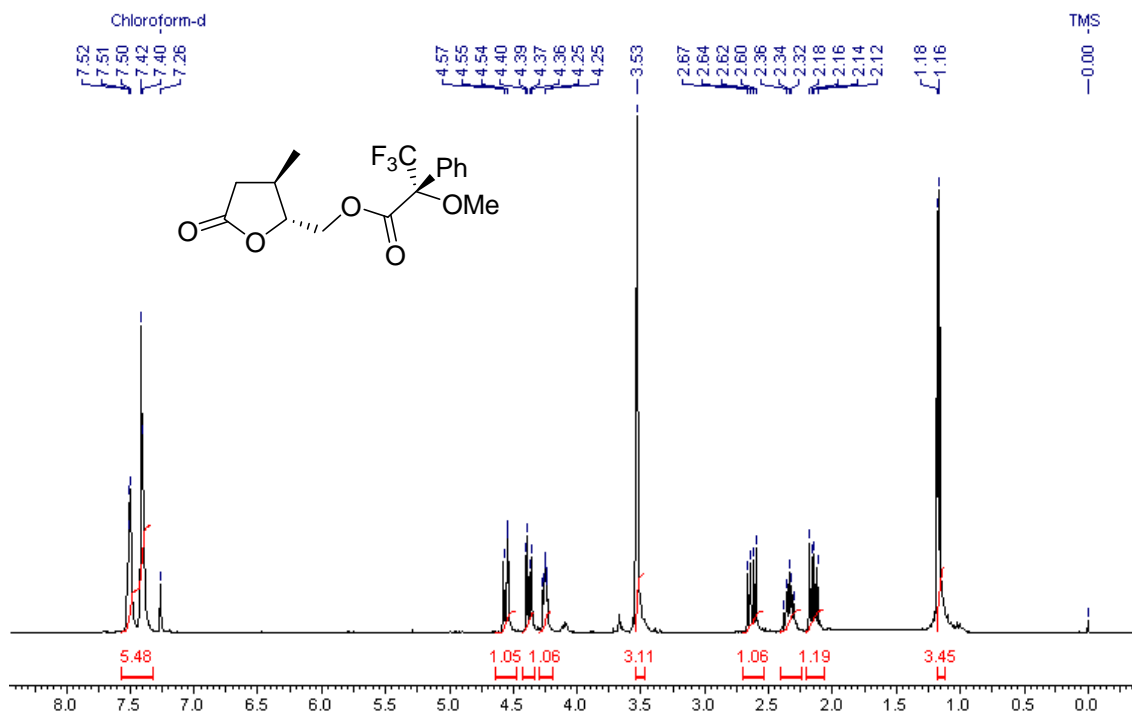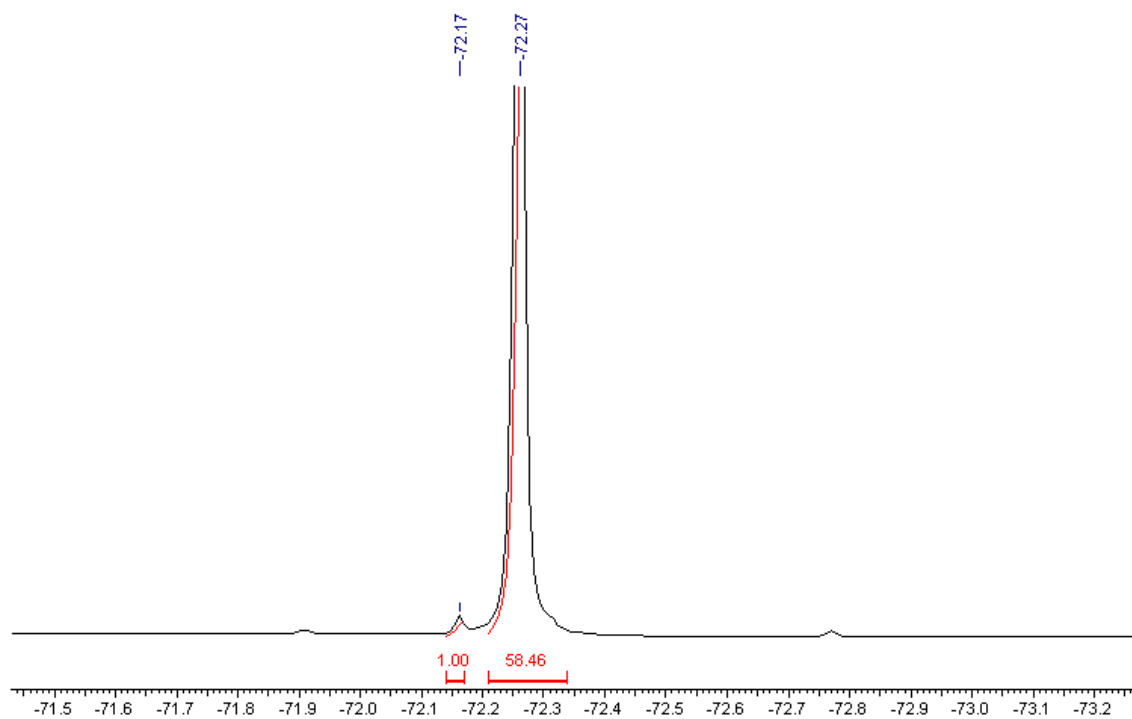

**(2R)-((2S,3S)-tetrahydro-3-methyl-5-oxofuran-2-yl)methyl**  
**methoxy-2-phenylpropanoate**

**3,3,3-trifluoro-2-**



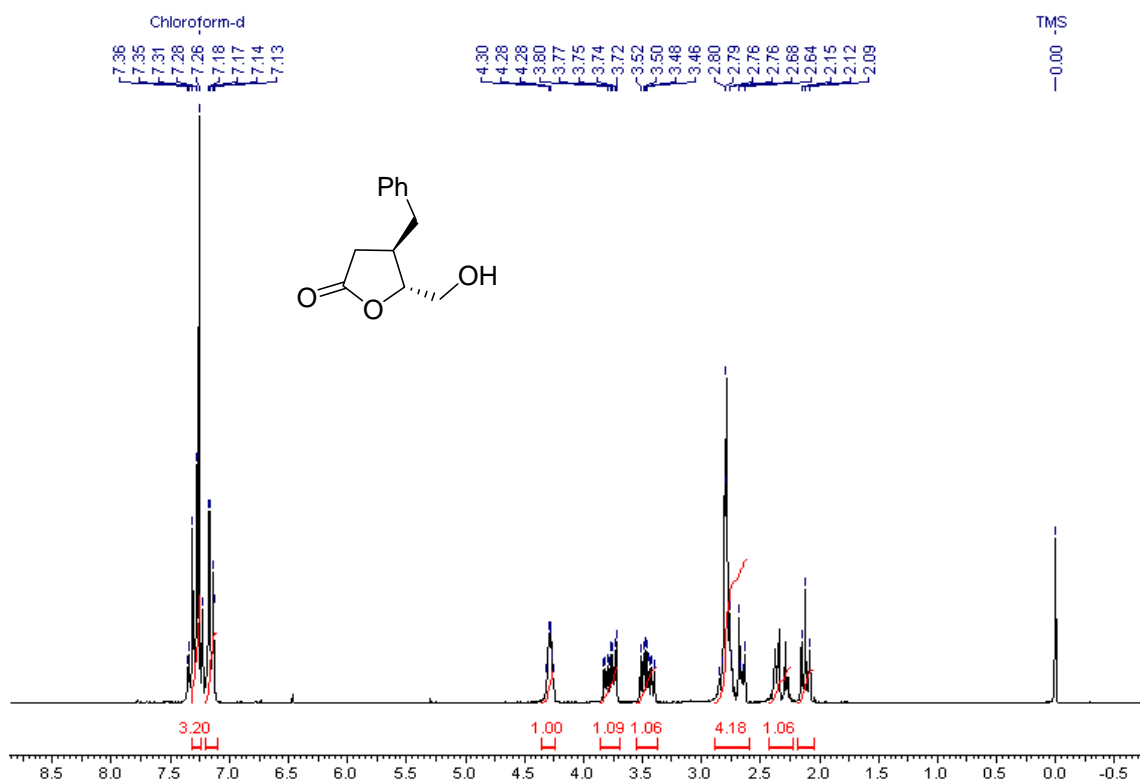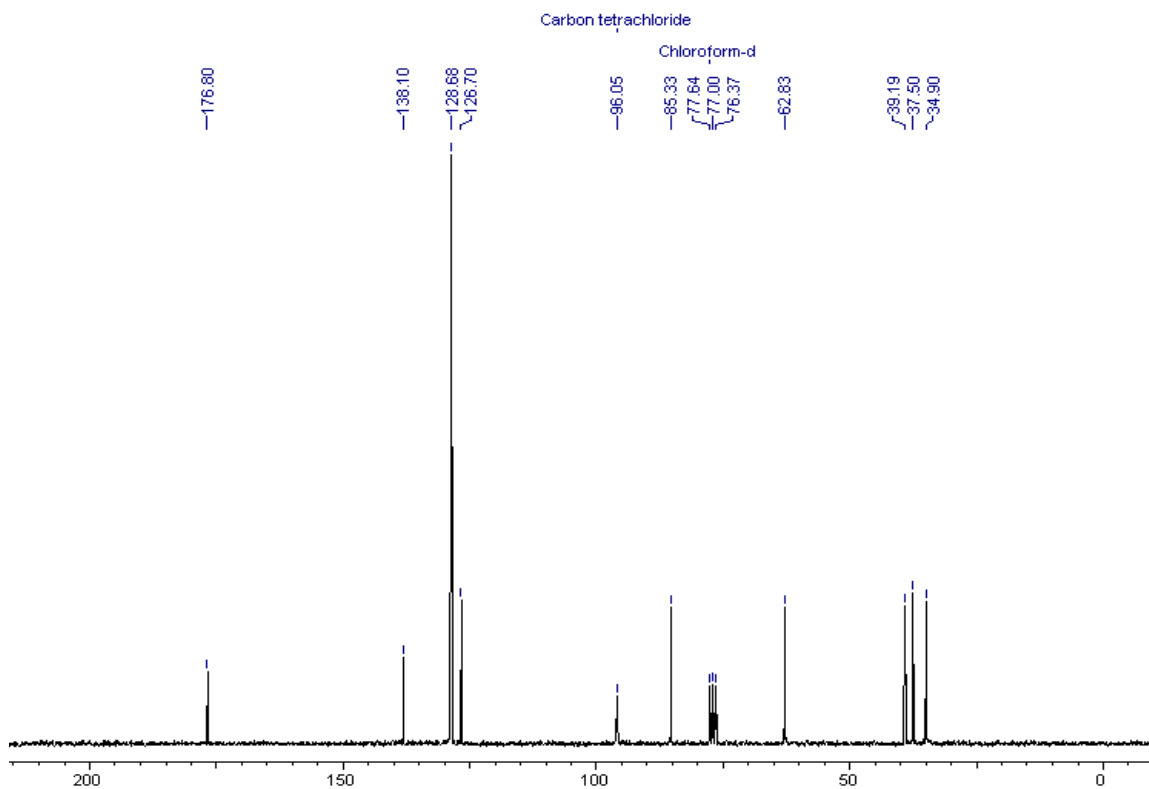

**(4R,5R)-4-benzyl-5-(hydroxymethyl)dihydrofuran-2(3H)-one (8g)**

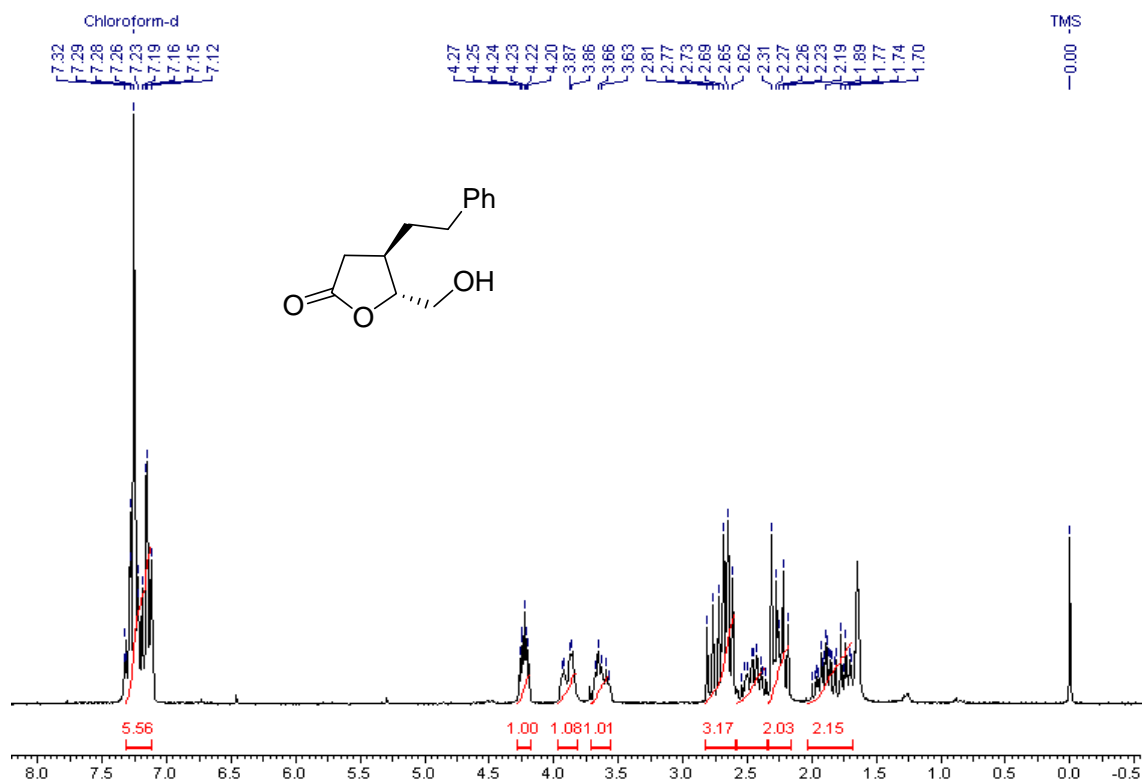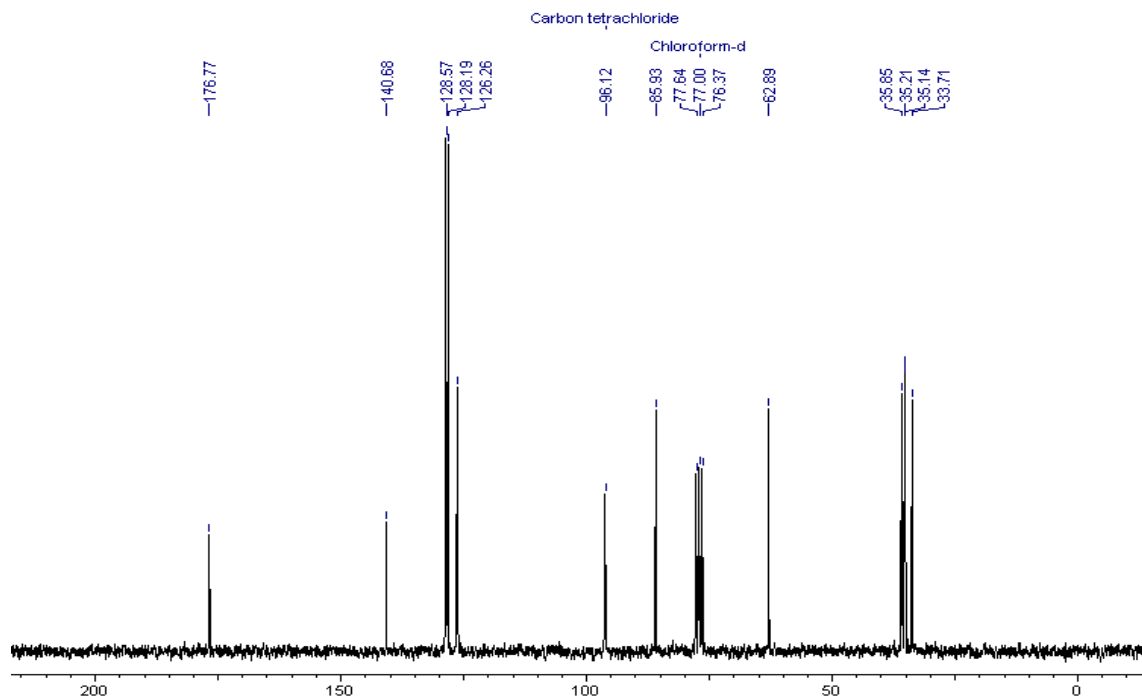

(4R,5R)-5-(hydroxymethyl)-4-phenyldihydrofuran-2(3H)-one (8h)

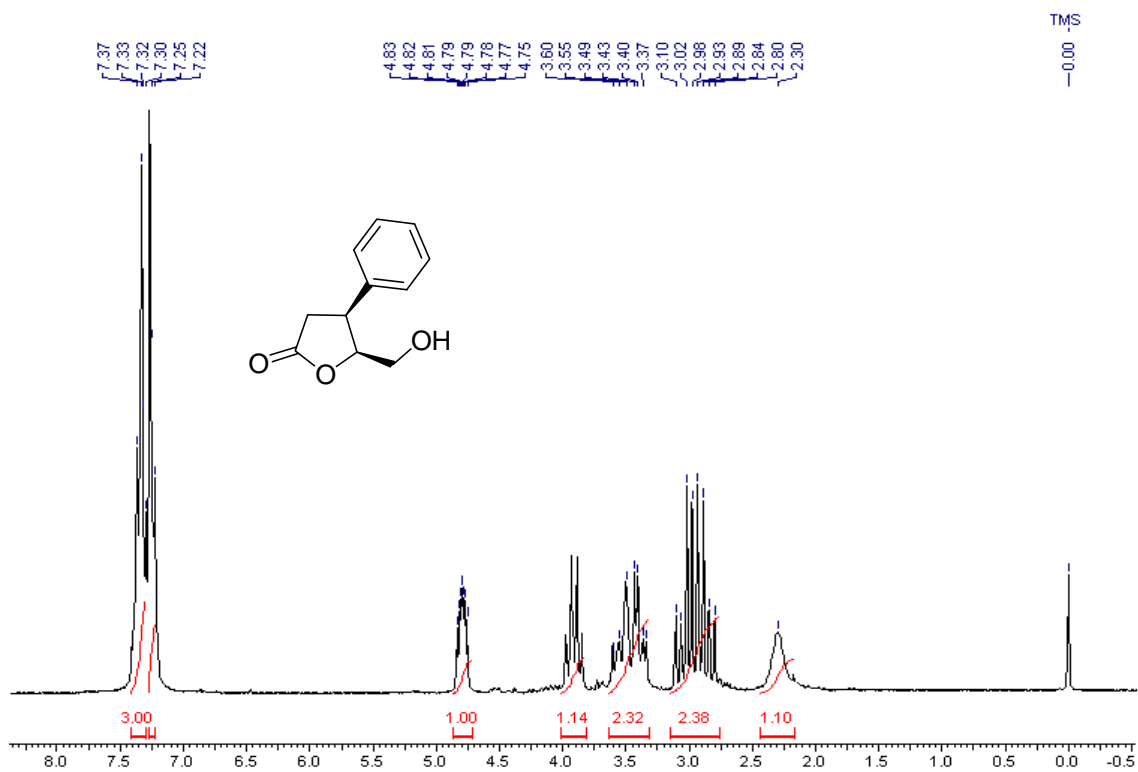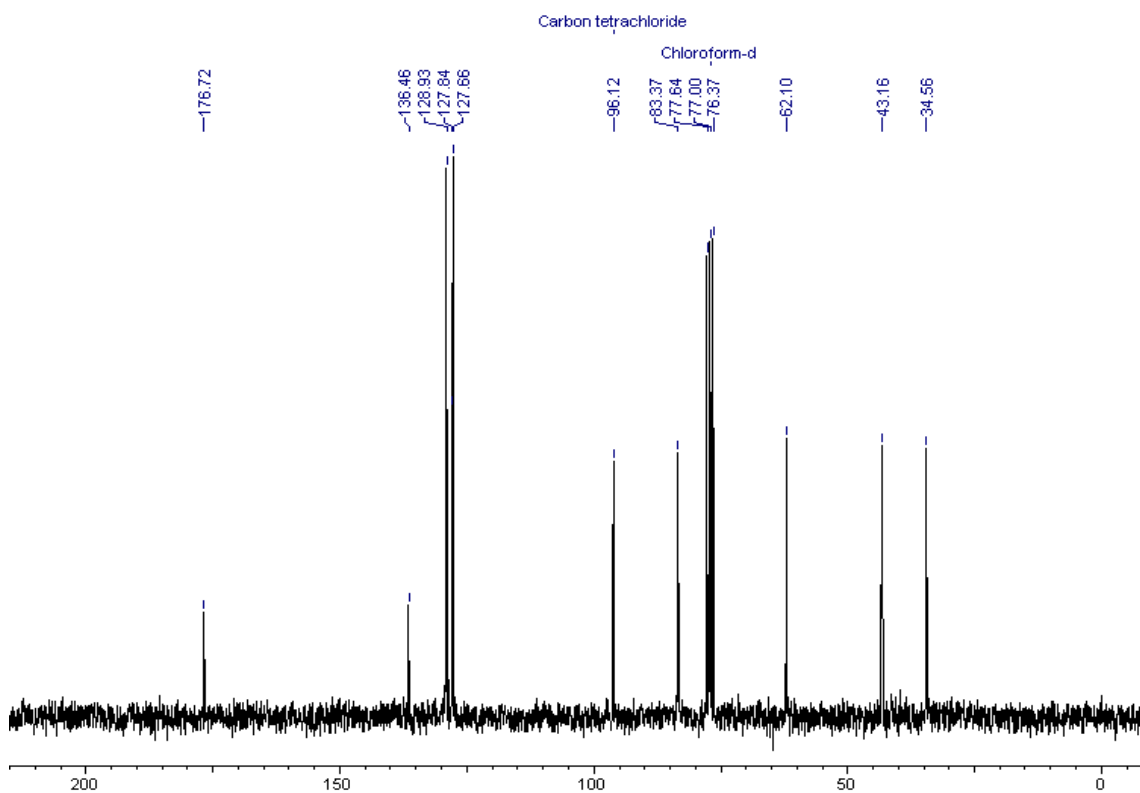

**(4*S*,5*S*)-5-(hydroxymethyl)-4-phenyldihydrofuran-2(3*H*)-one (11a)**

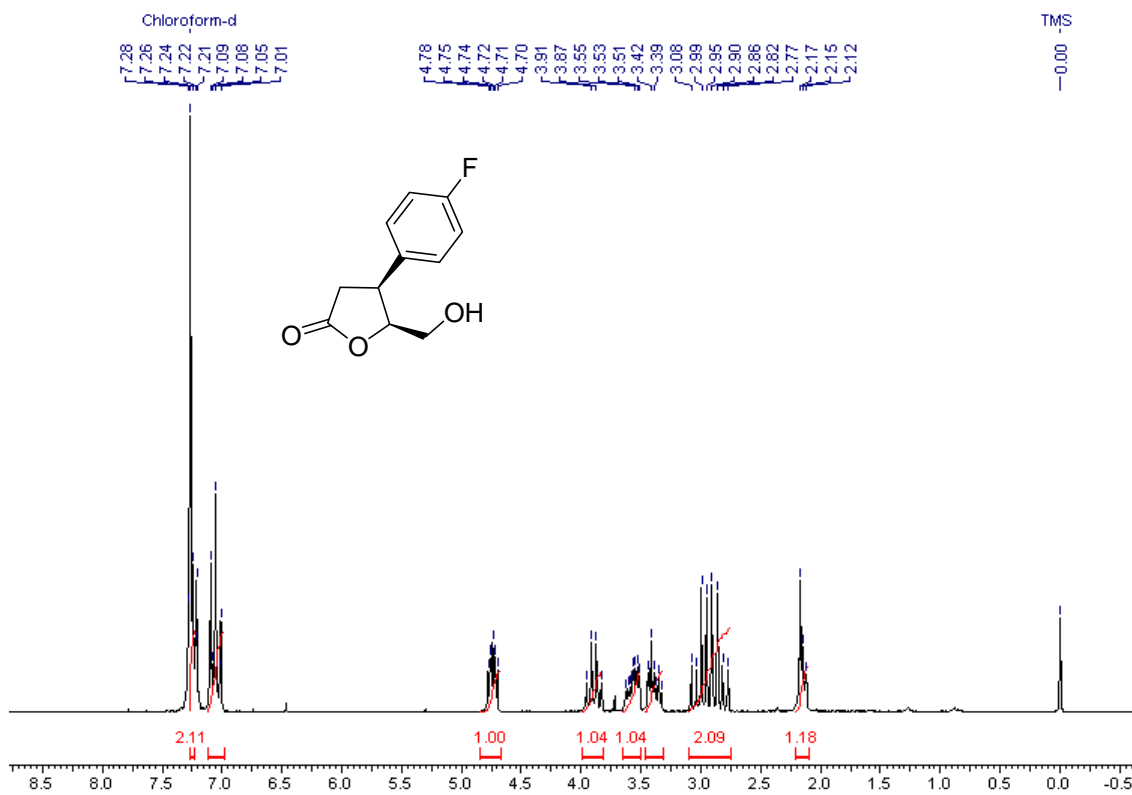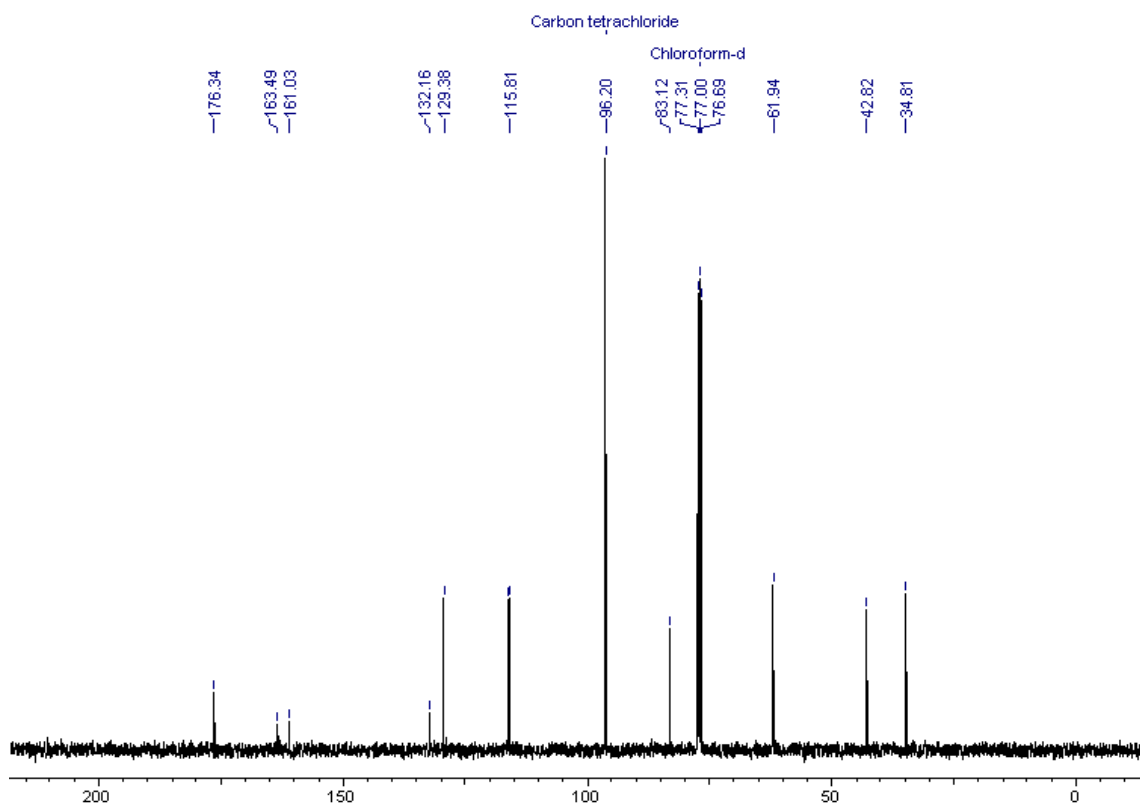

**(4*S*,5*S*)-4-(4-fluorophenyl)-5-(hydroxymethyl)dihydrofuran-2(3*H*)-one (11b)**

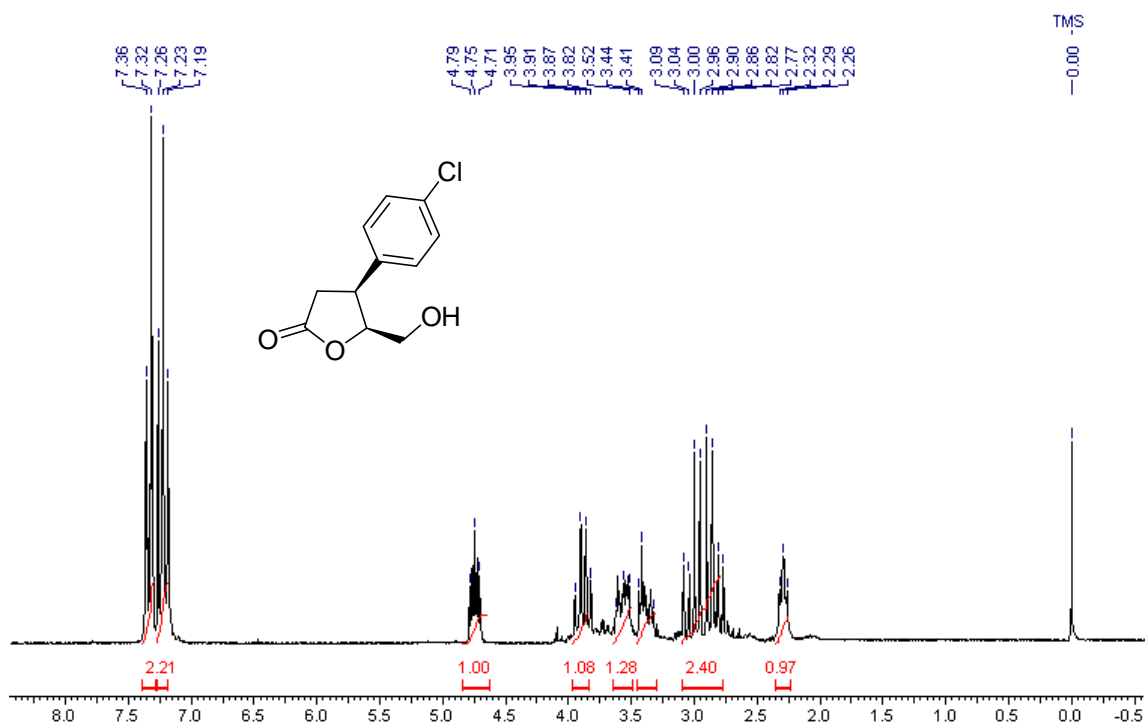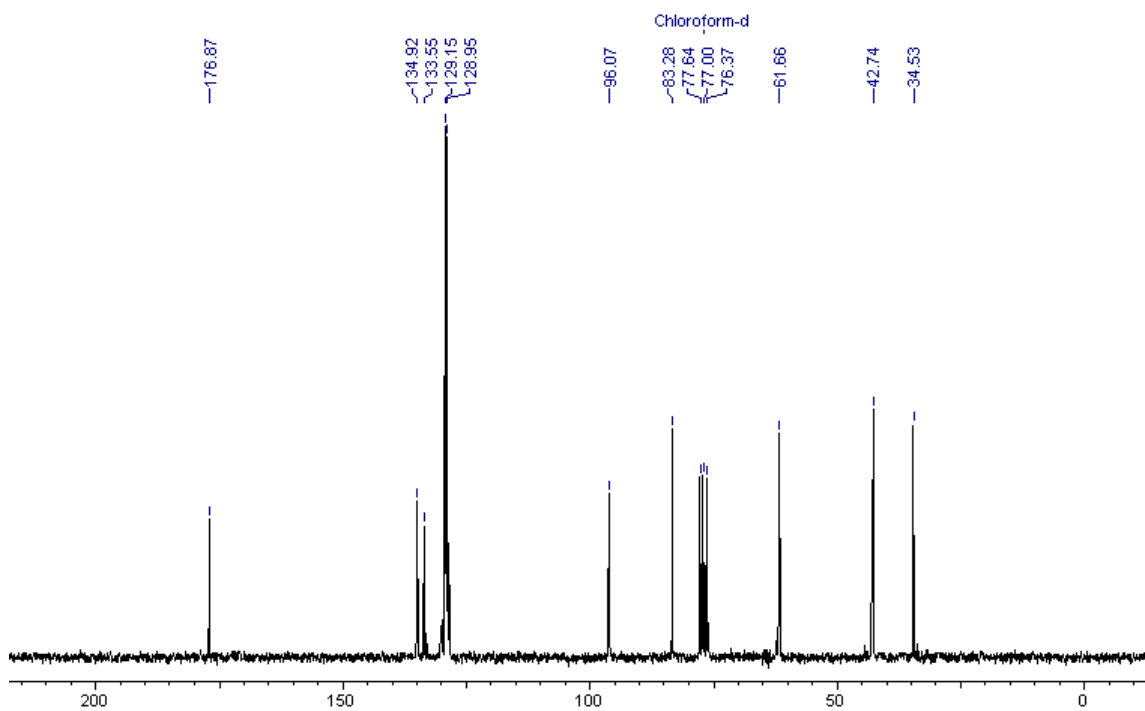

**(4*S*,5*S*)-4-(4-chlorophenyl)-5-(hydroxymethyl) dihydrofuran-2(3*H*)-one (11c)**

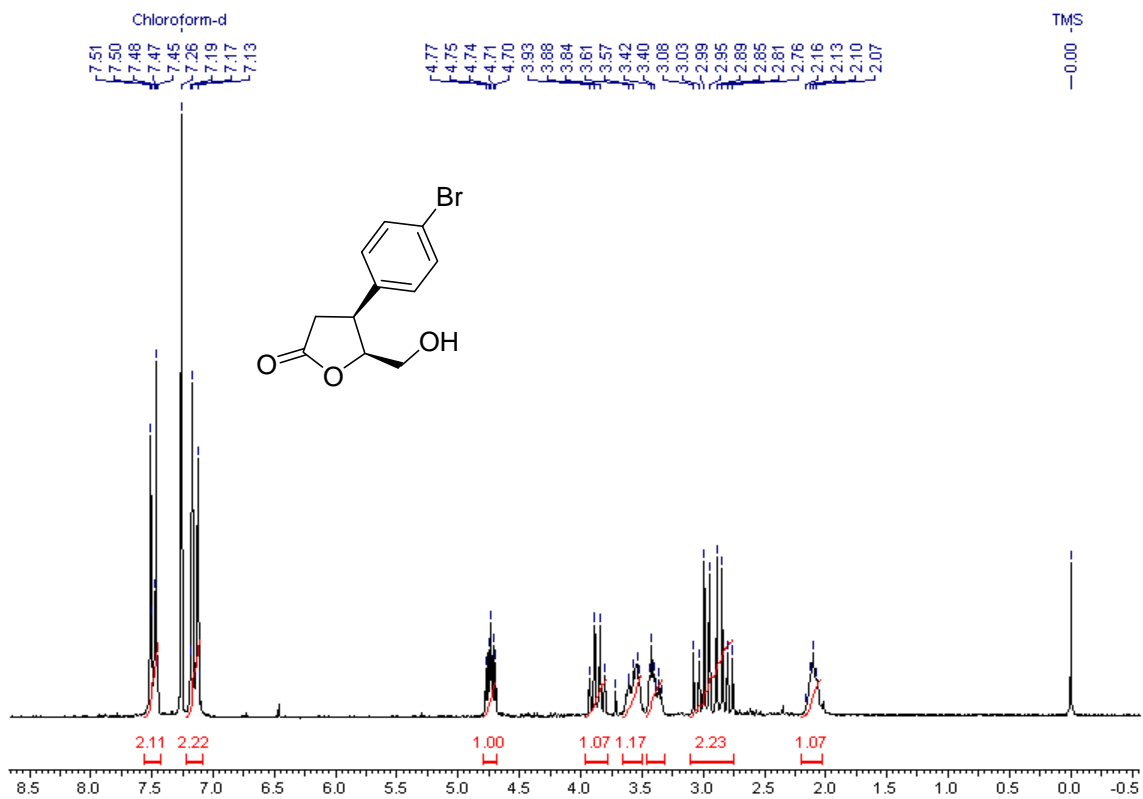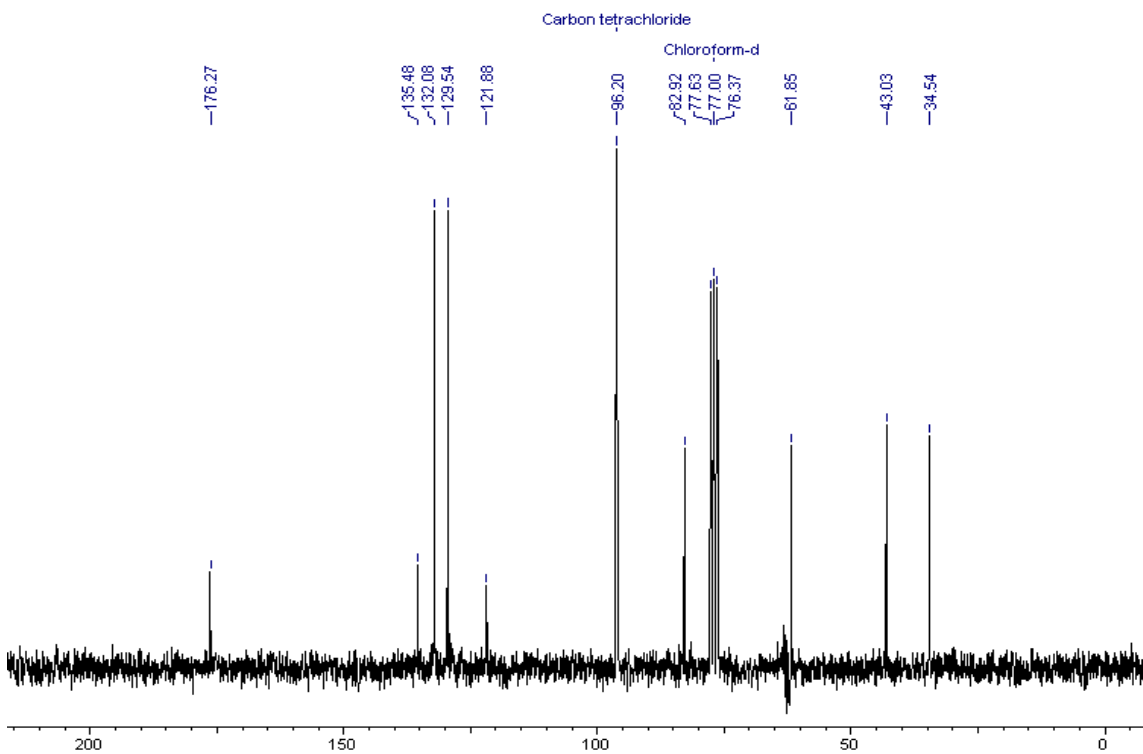

(4*S*,5*S*)-4-(4-bromophenyl)-5-(hydroxymethyl)dihydrofuran-2(3*H*)-one (11d)

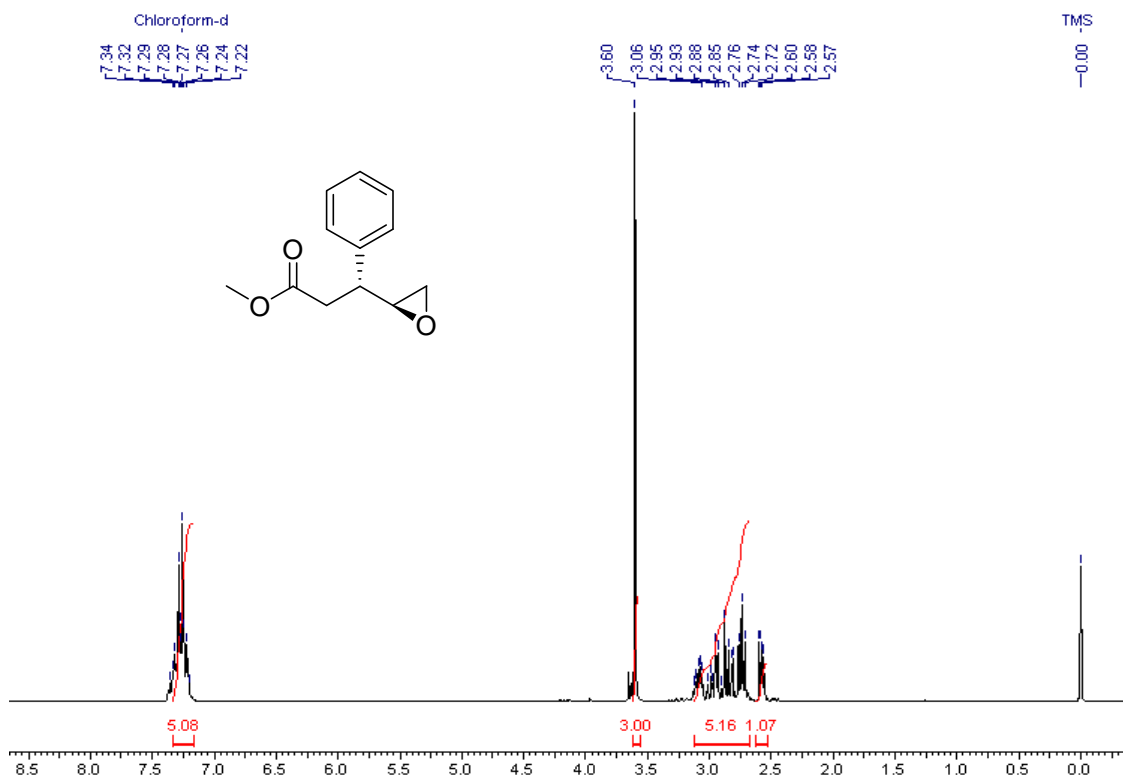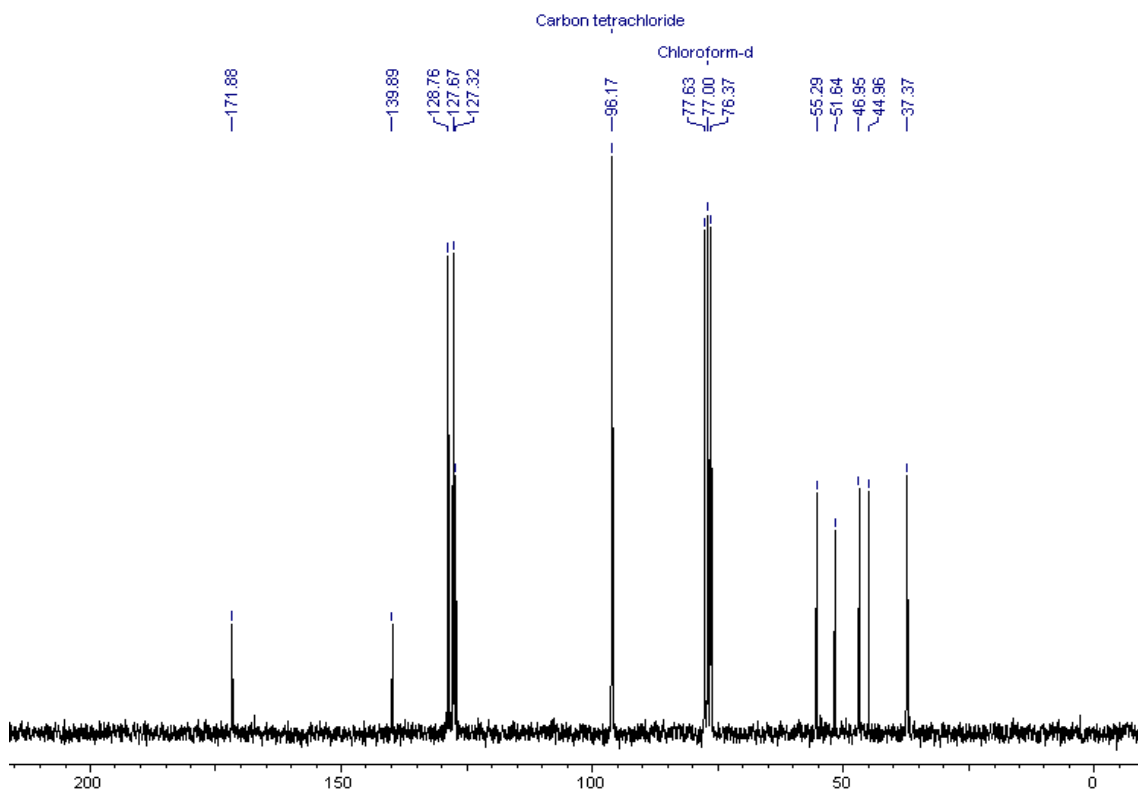

**(R)-methyl 3-((S)-oxiran-2-yl)-3-phenylpropanoate (9a)**

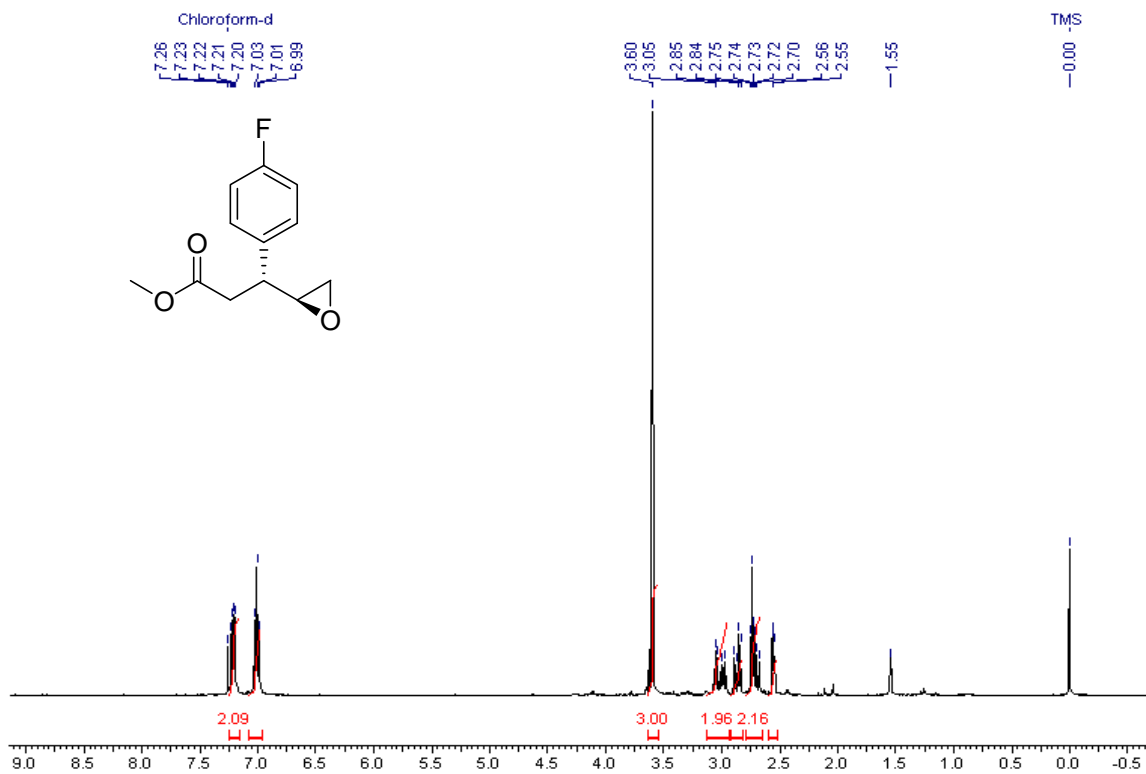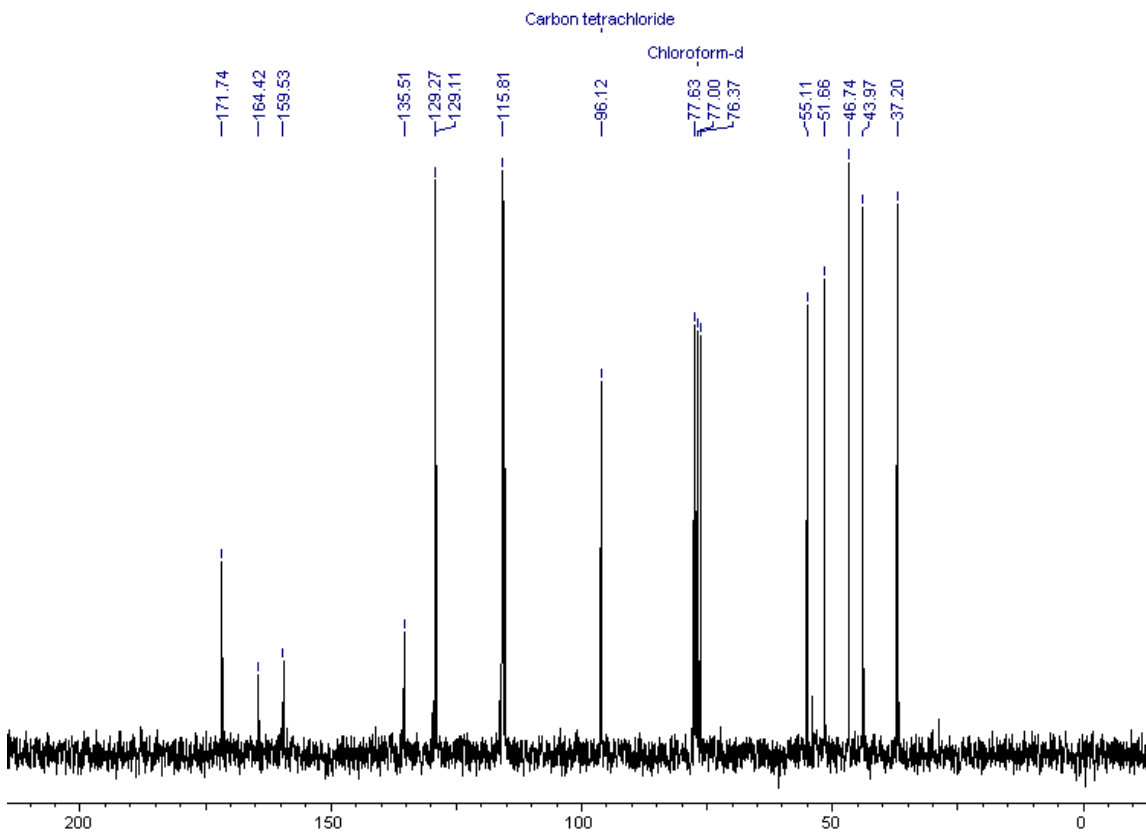

**(R)-methyl 3-(4-fluorophenyl)-3-((S)-oxiran-2-yl)propanoate (9b)**



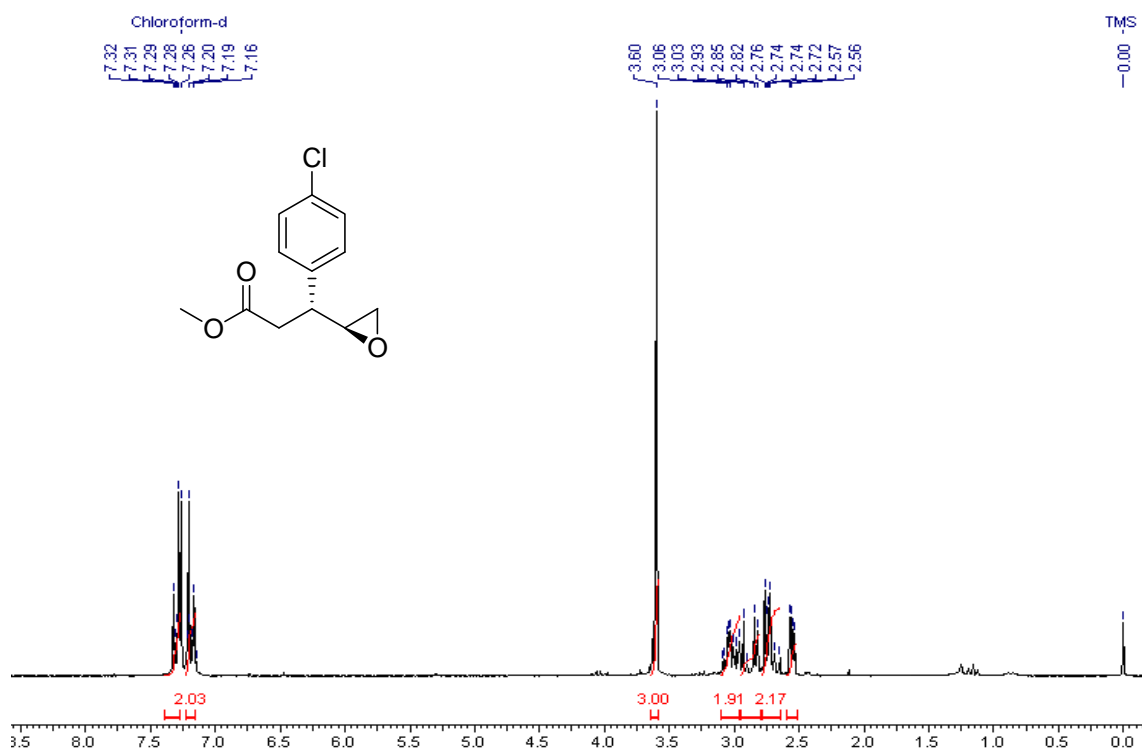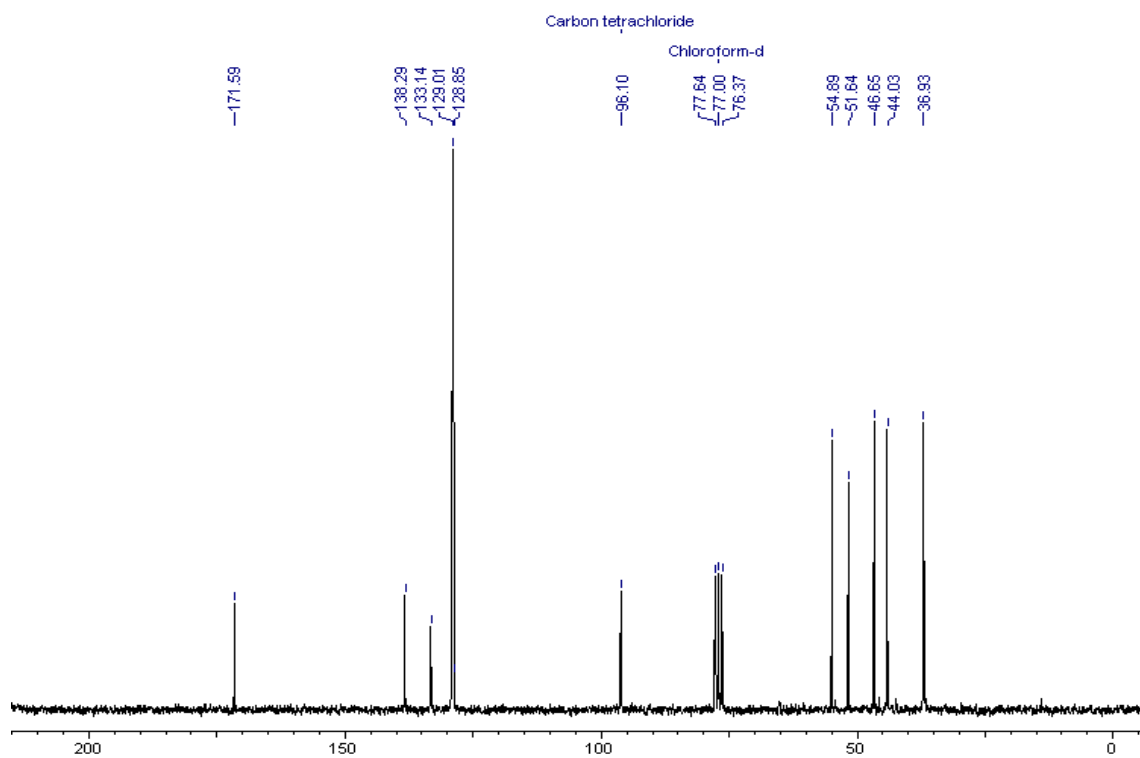

**(R)-methyl 3-(4-chlorophenyl)-3-((S)-oxiran-2-yl)propanoate (9c)**

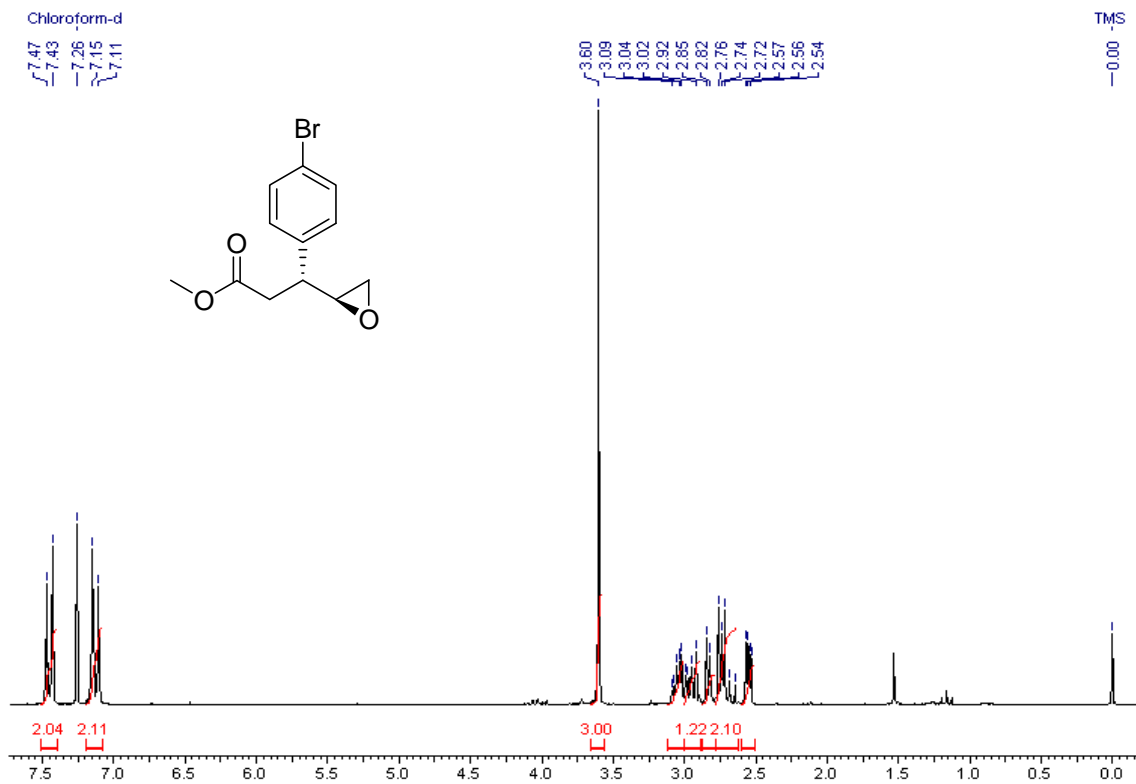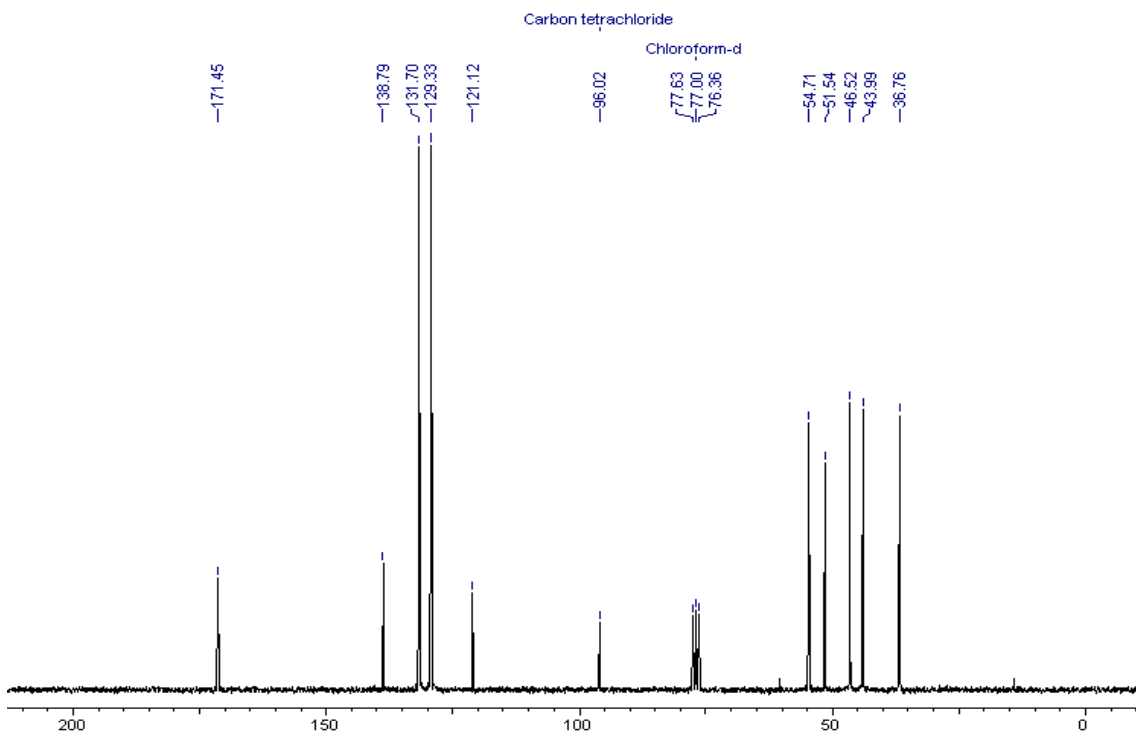

**(R)-methyl 3-(4-bromophenyl)-3-((S)-oxiran-2-yl)propanoate (9d)**

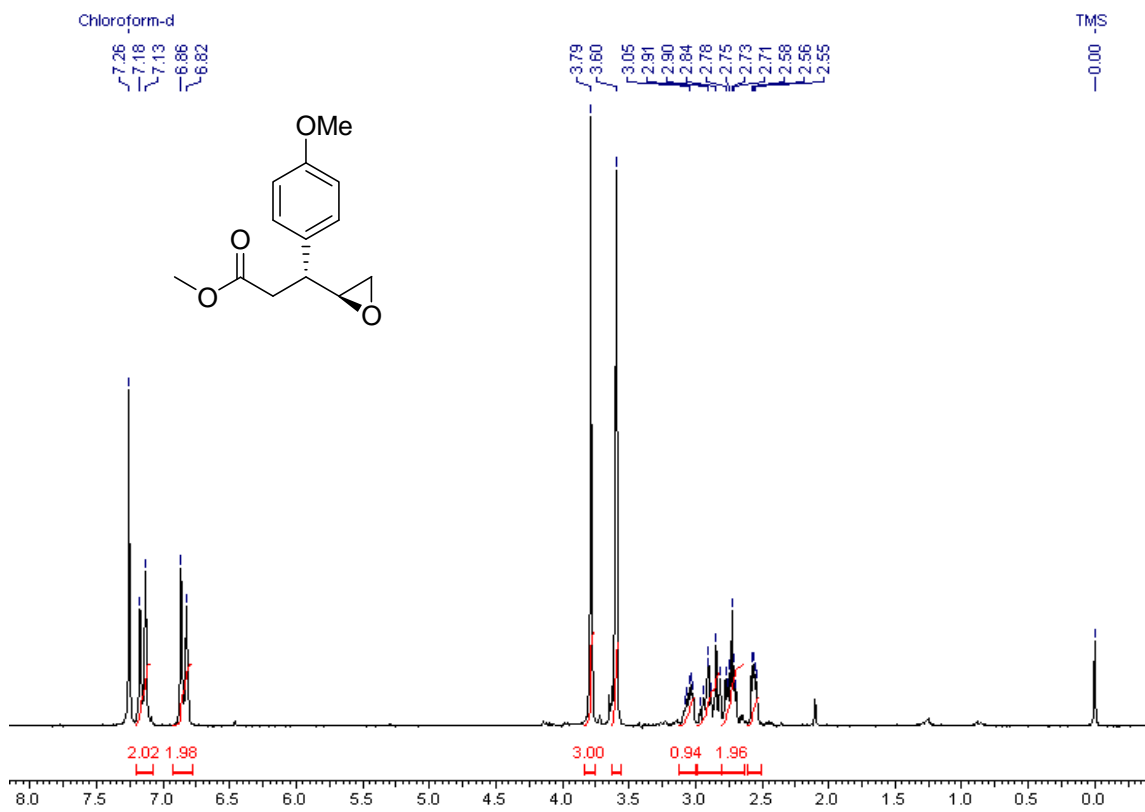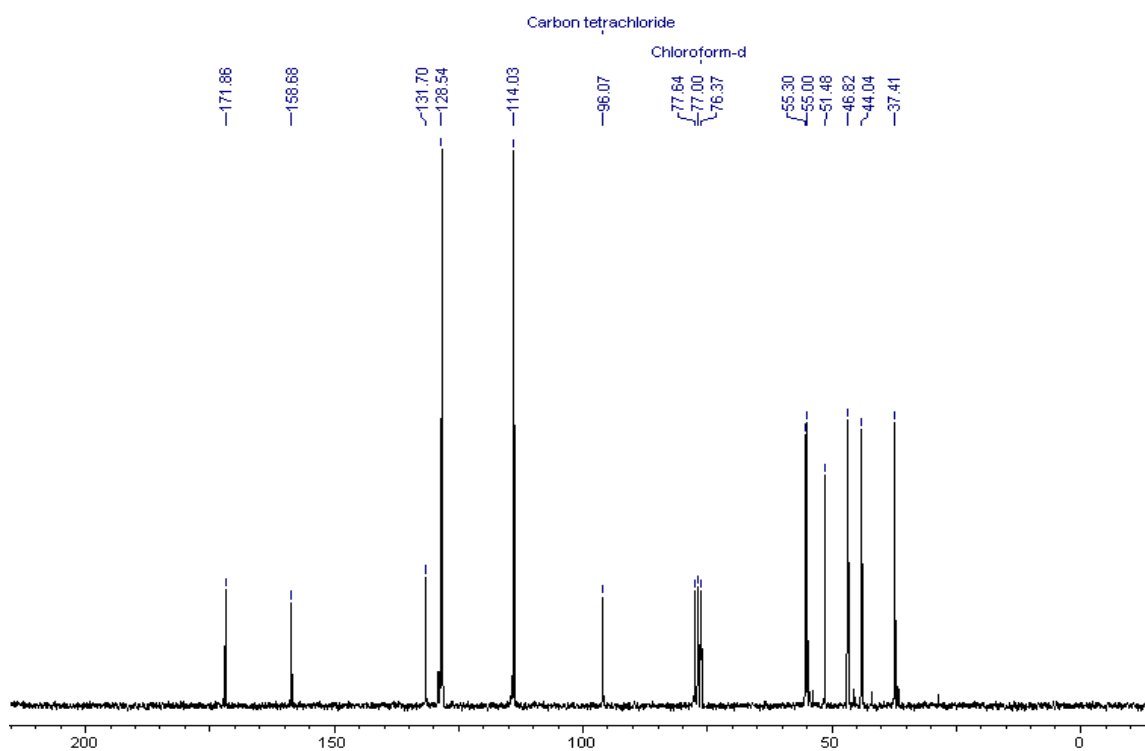

**(R)-methyl 3-(4-methoxyphenyl)-3-((S)-oxiran-2-yl)propanoate (9e)**

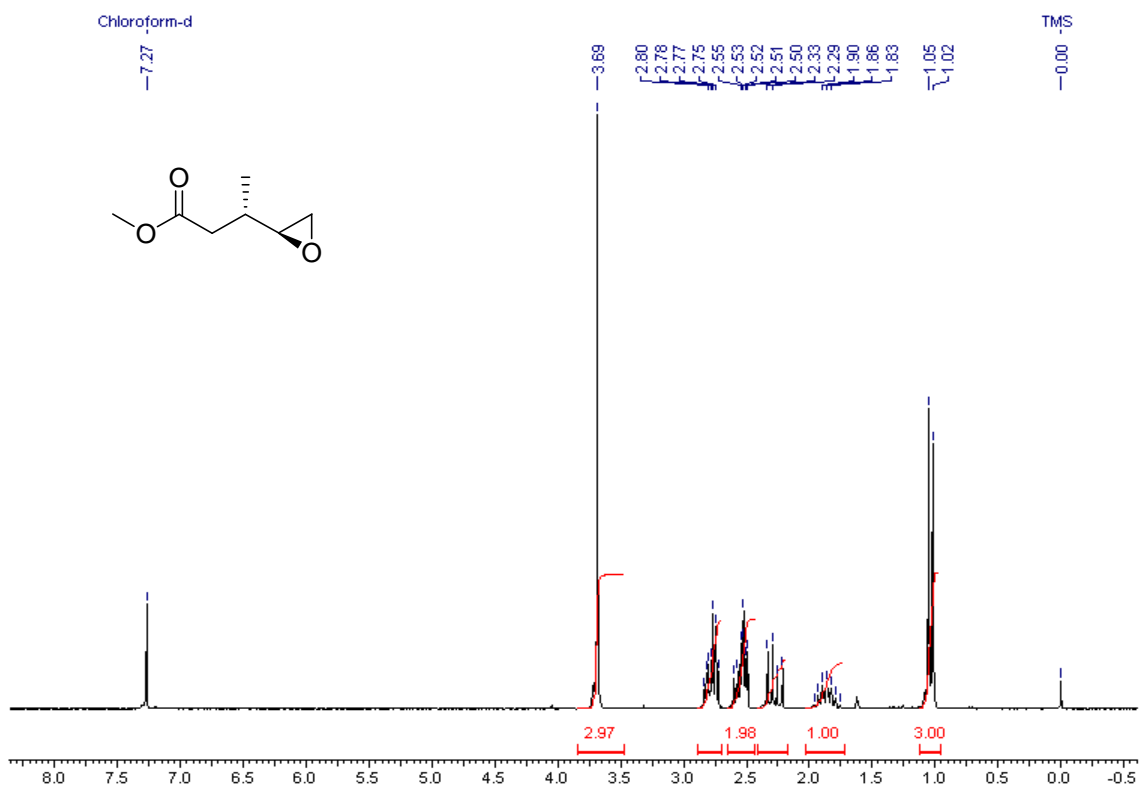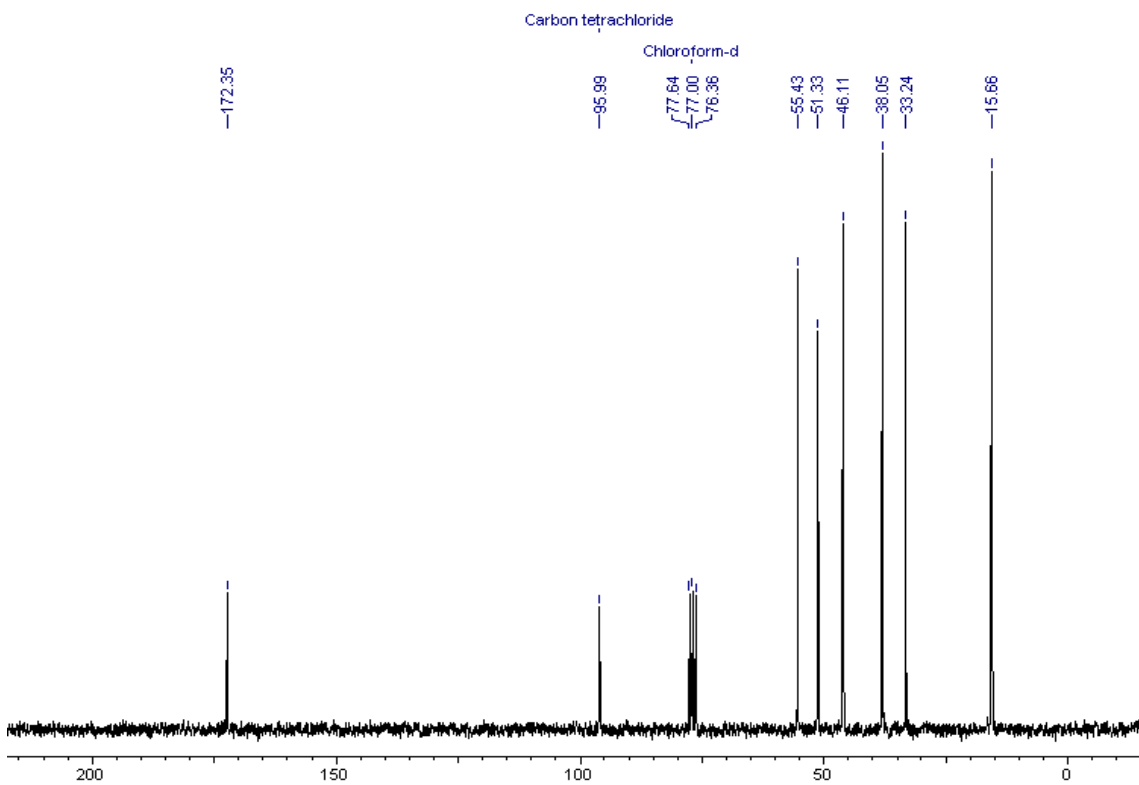

**(S)-methyl 3-((S)-oxiran-2-yl)butanoate (9f)**

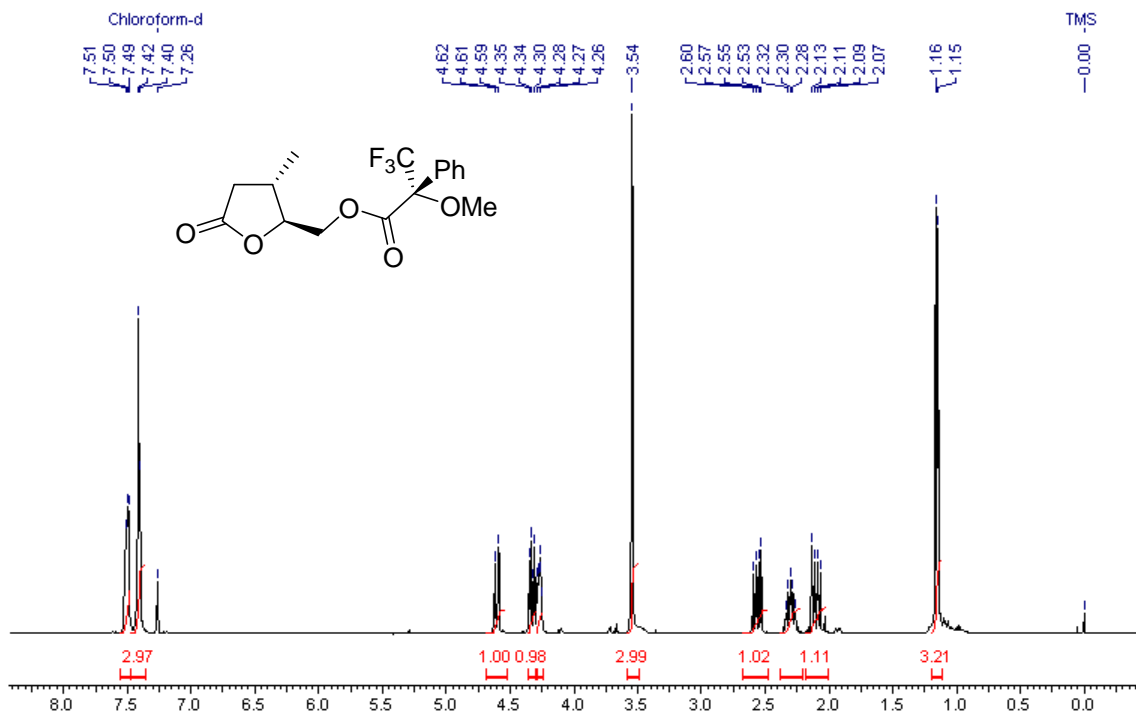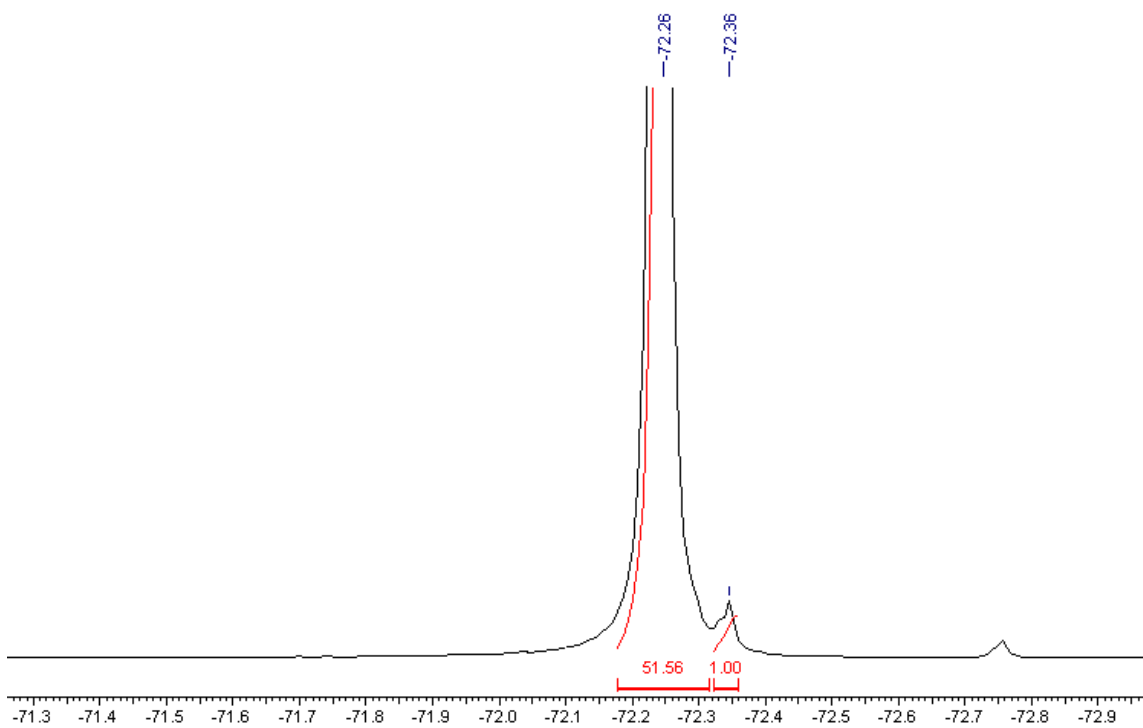

**(2R)-((2S,3S)-tetrahydro-3-methyl-5-oxofuran-2-yl)methyl 3,3,3-trifluoro-2-methoxy-2-phenylpropanoate**

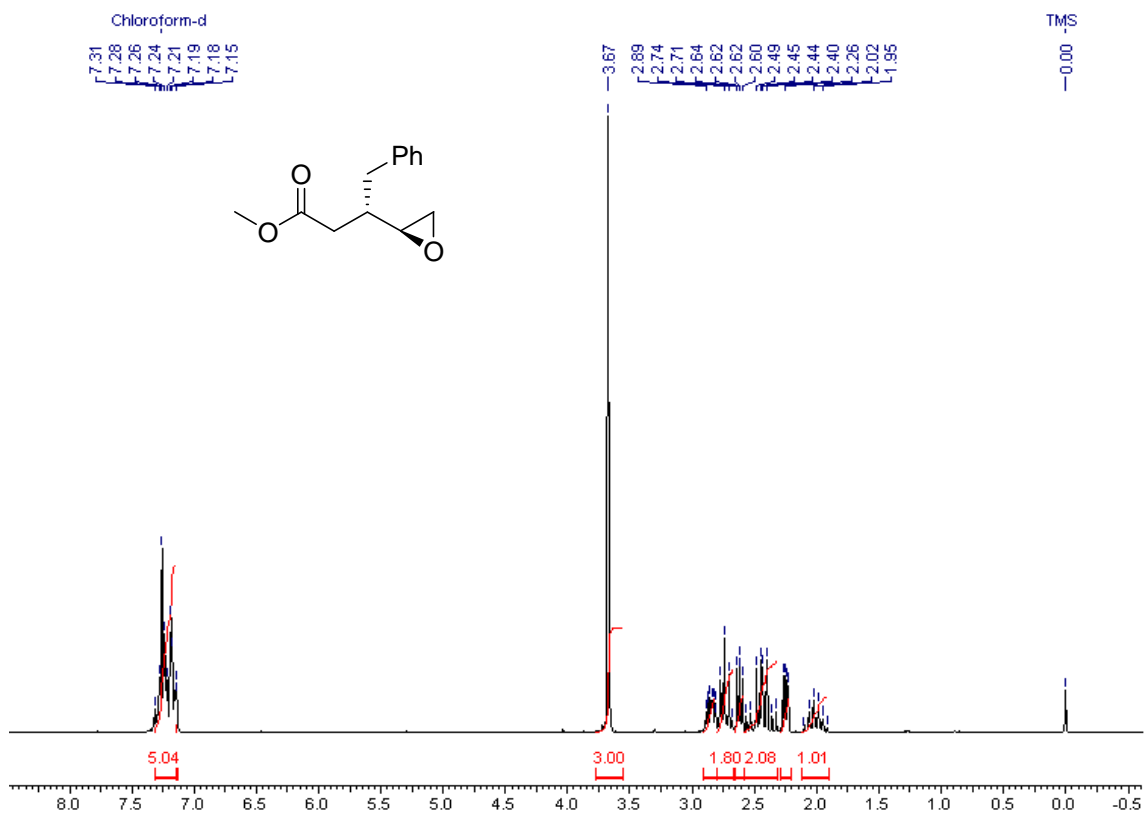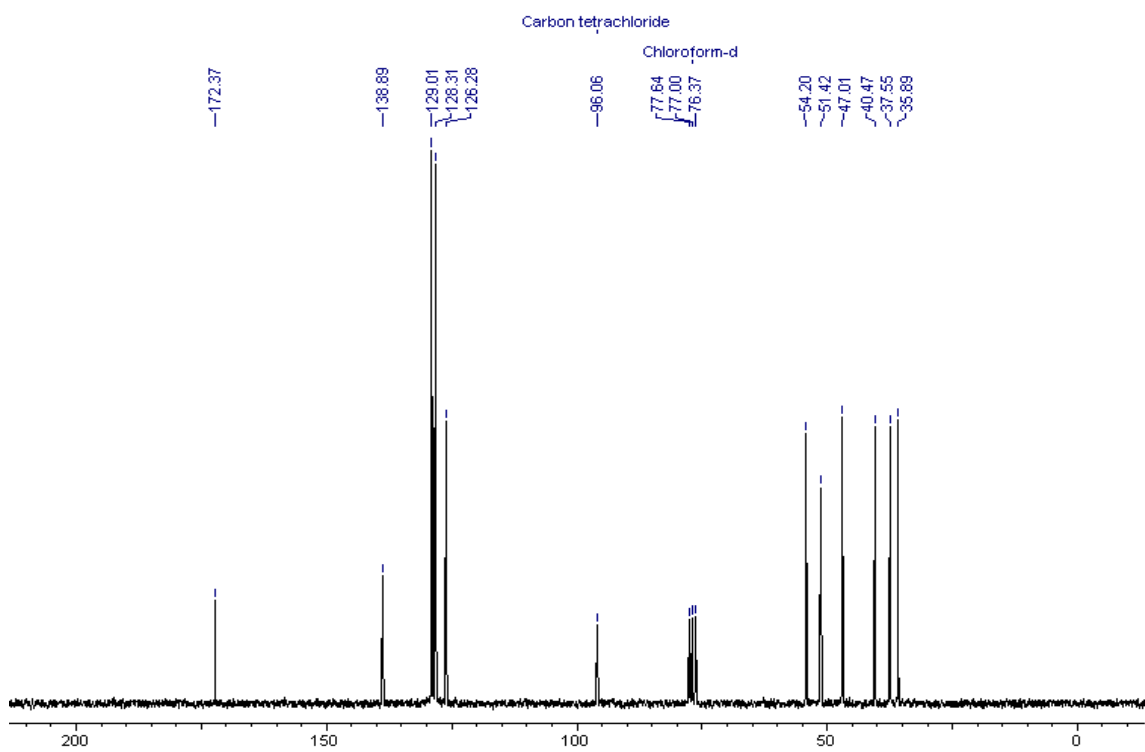

**(S)-methyl 3-((S)-oxiran-2-yl)-4-phenylbutanoate (9g)**

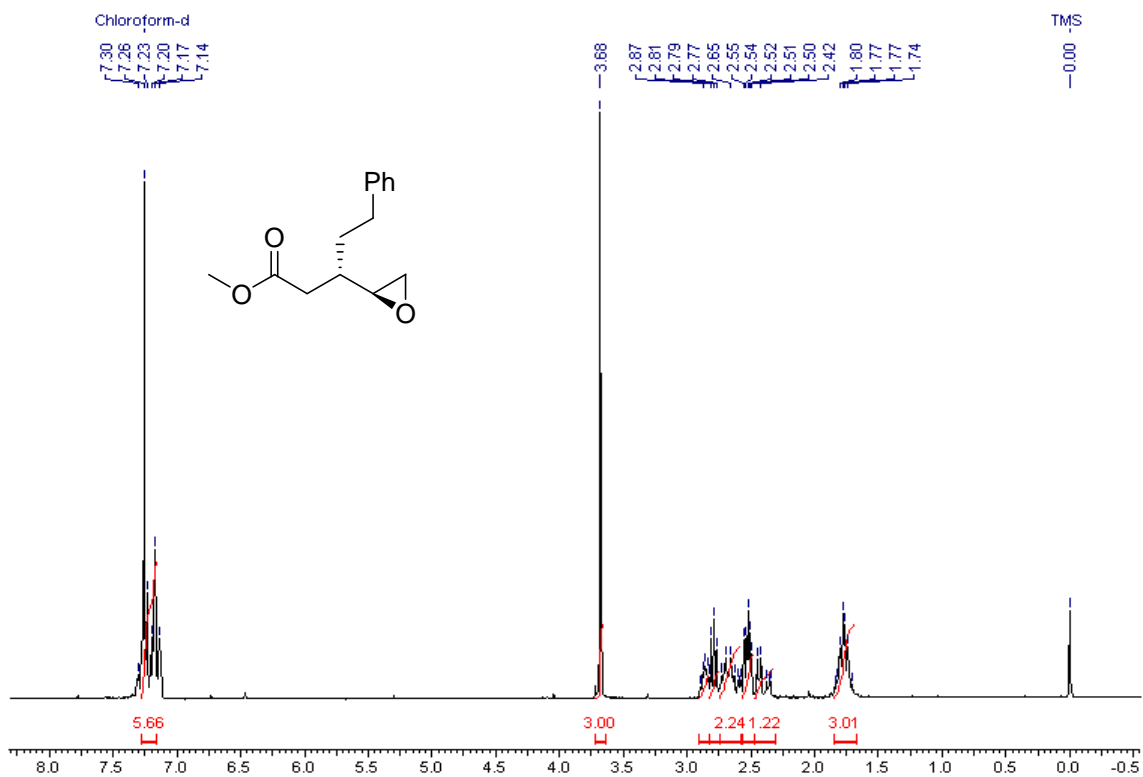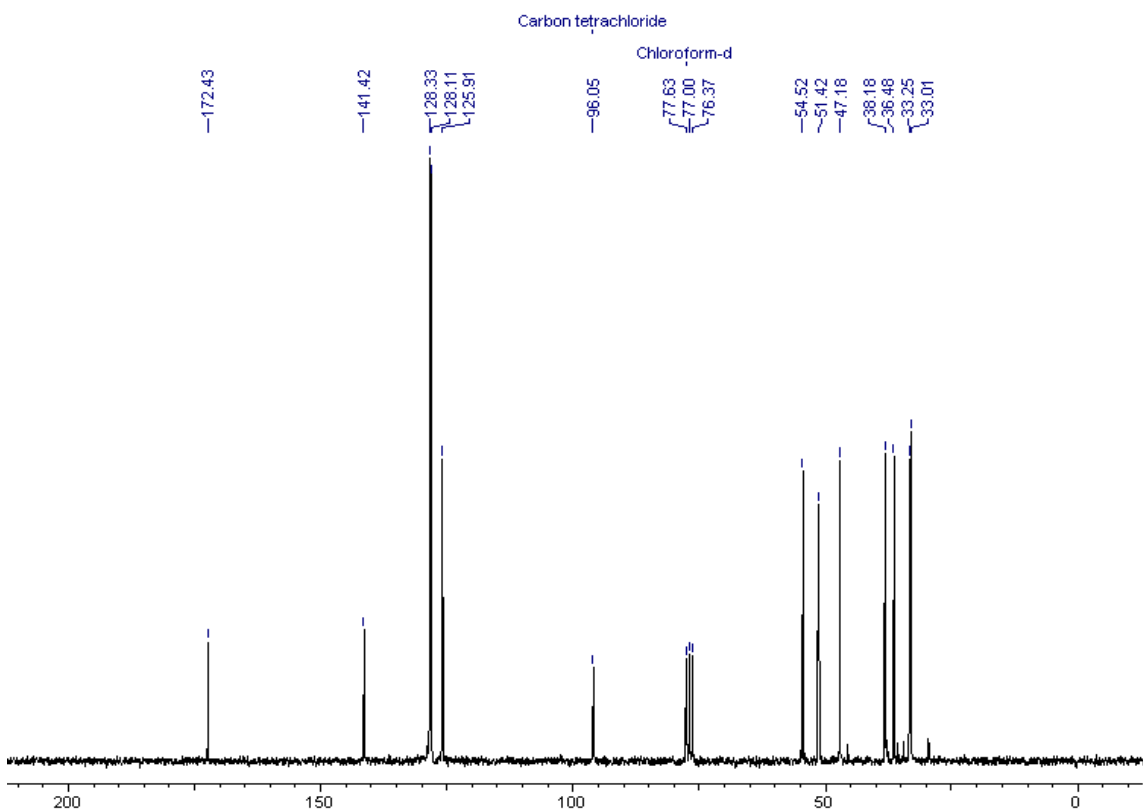

**(S)-methyl 3-((S)-oxiran-2-yl)-5-phenylpentanoate (9h)**

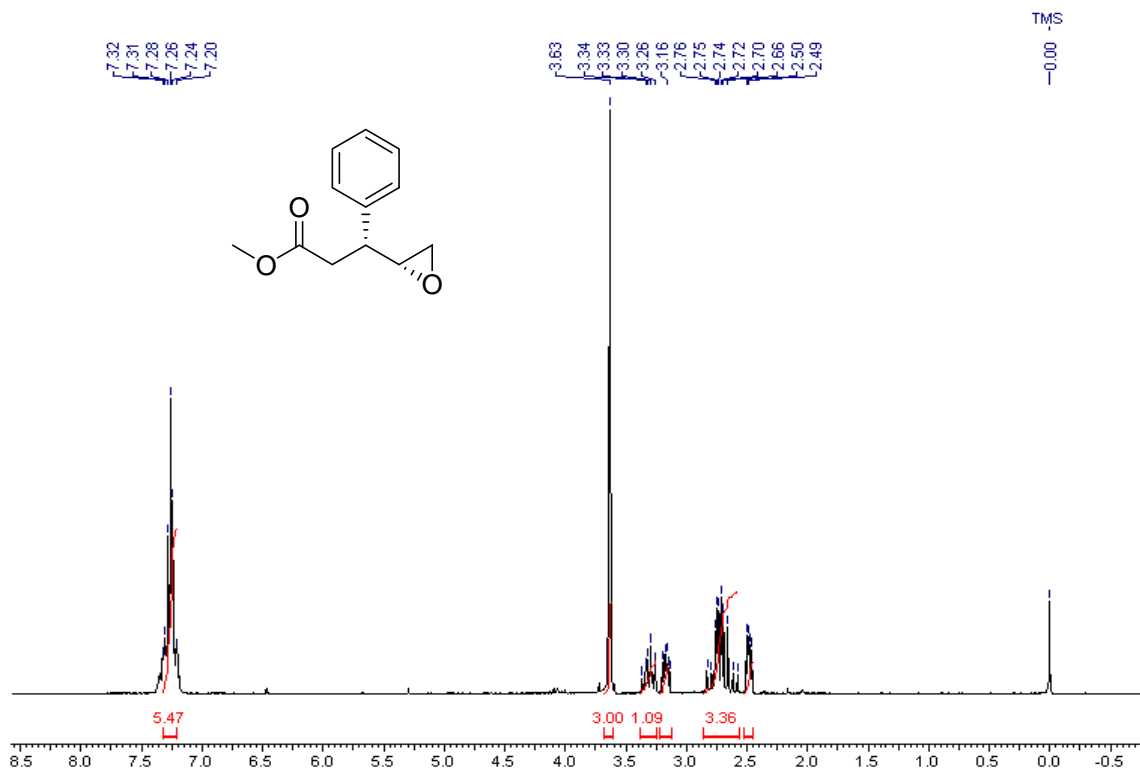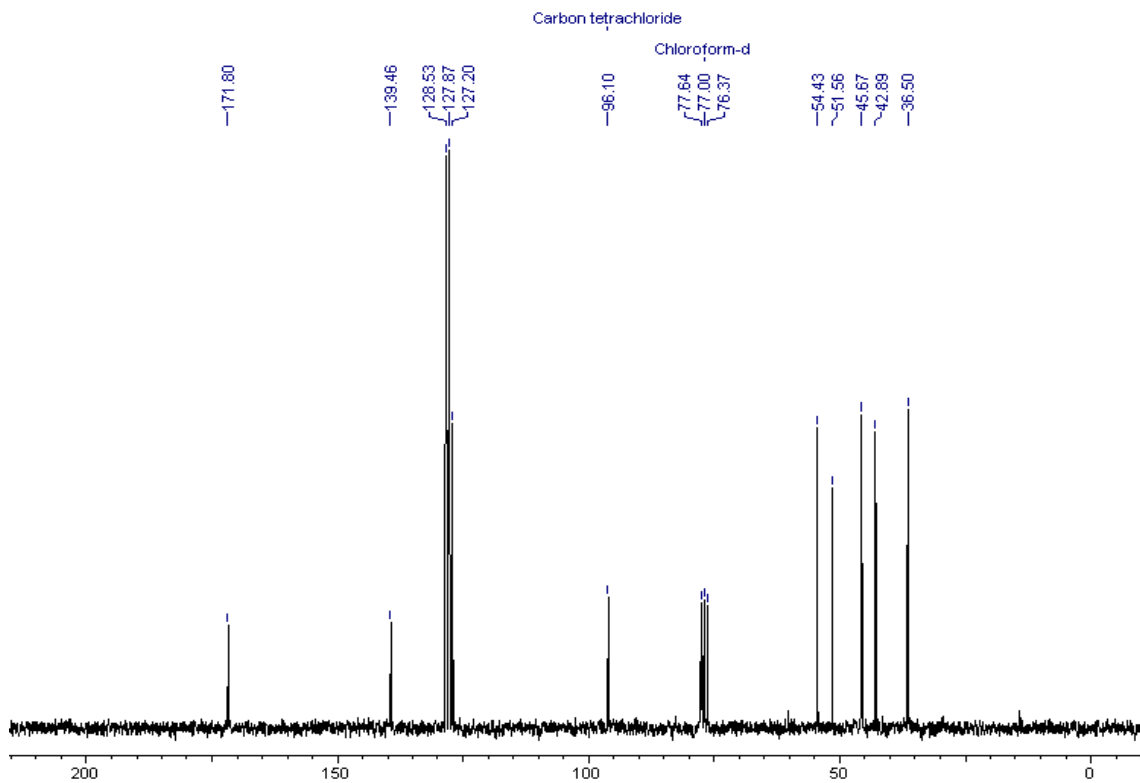

***(R)*-methyl 3-((*R*)-oxiran-2-yl)-3-phenylpropanoate (12a)**



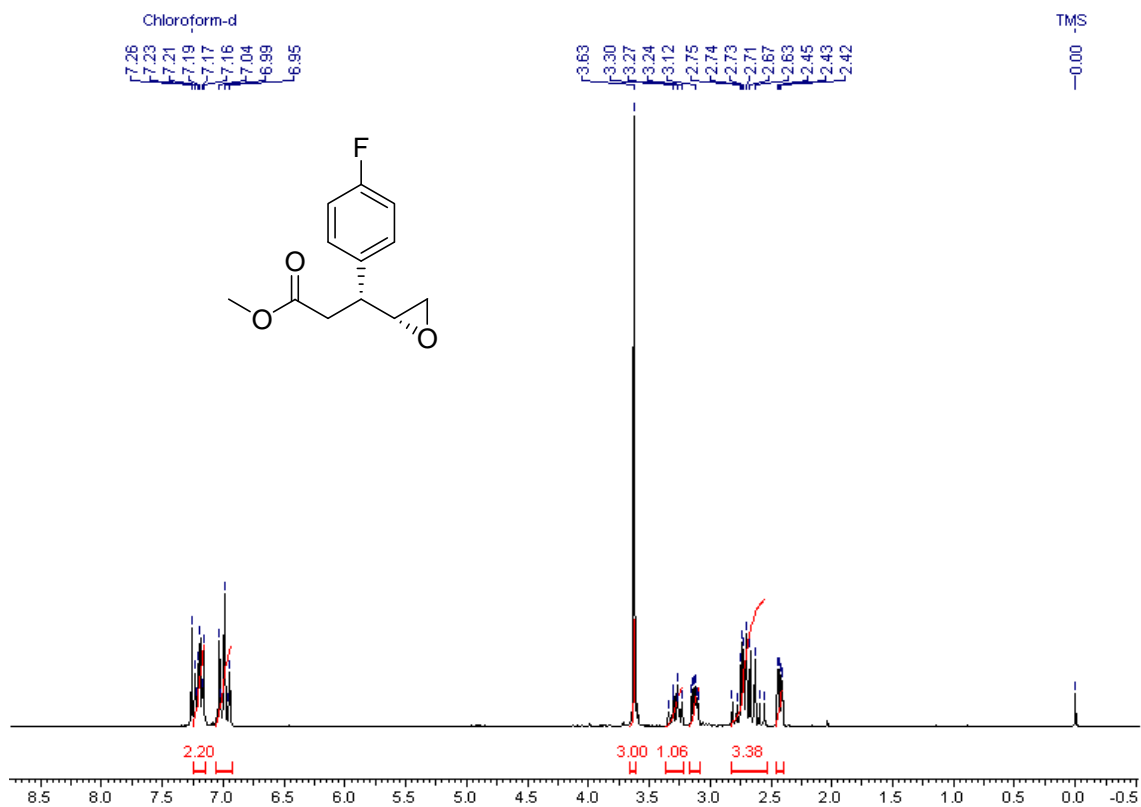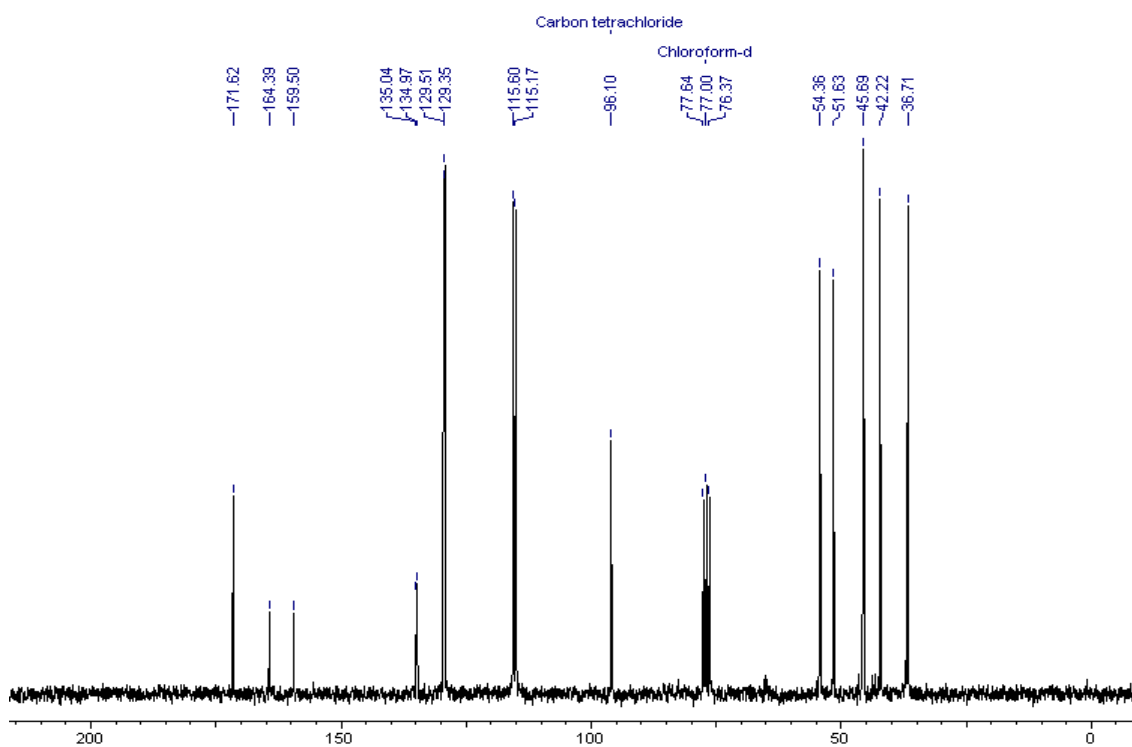

**(R)-methyl 3-(4-fluorophenyl)-3-((R)-oxiran-2-yl)propanoate (12b)**

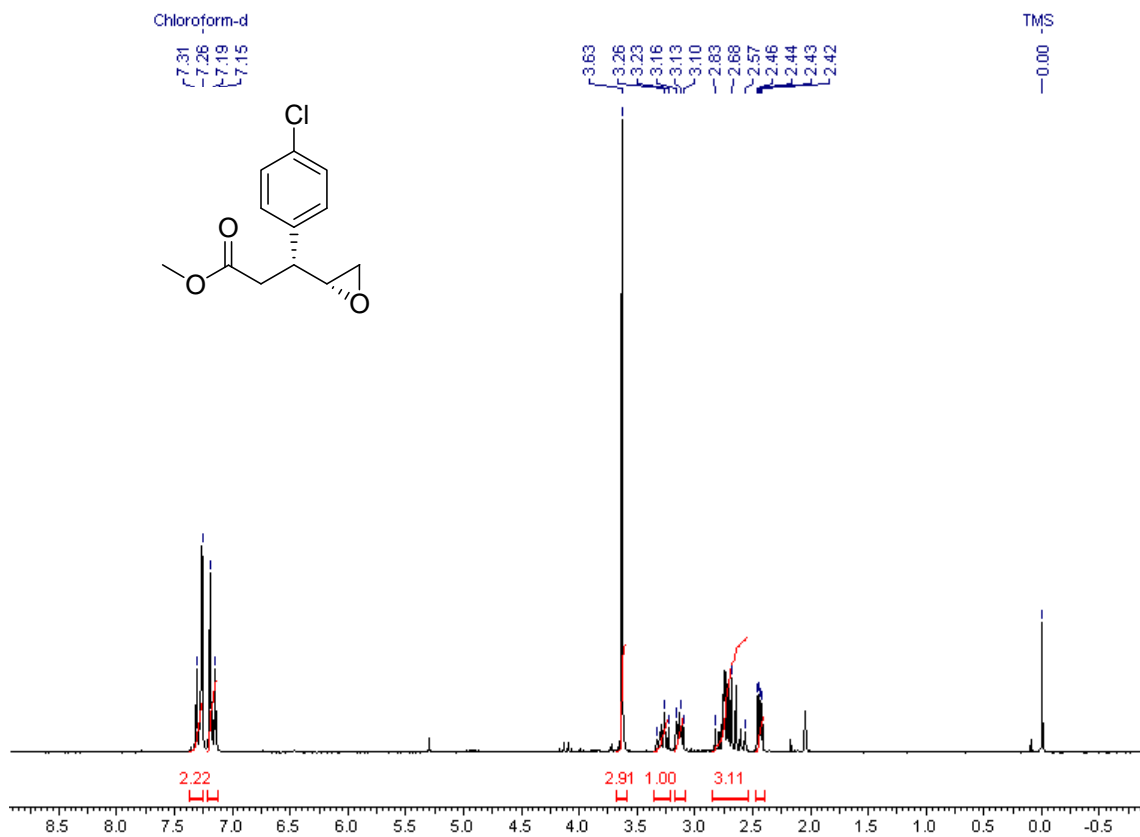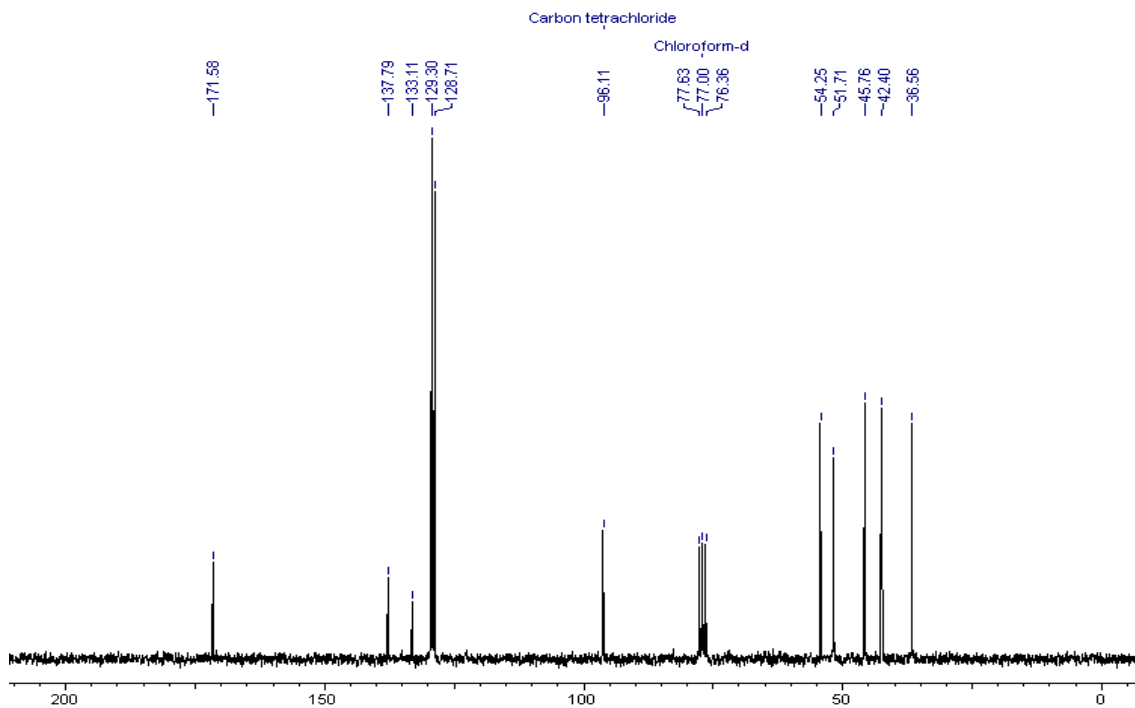

(R)-methyl 3-(4-chlorophenyl)-3-((R)-oxiran-2-yl)propanoate (12c)

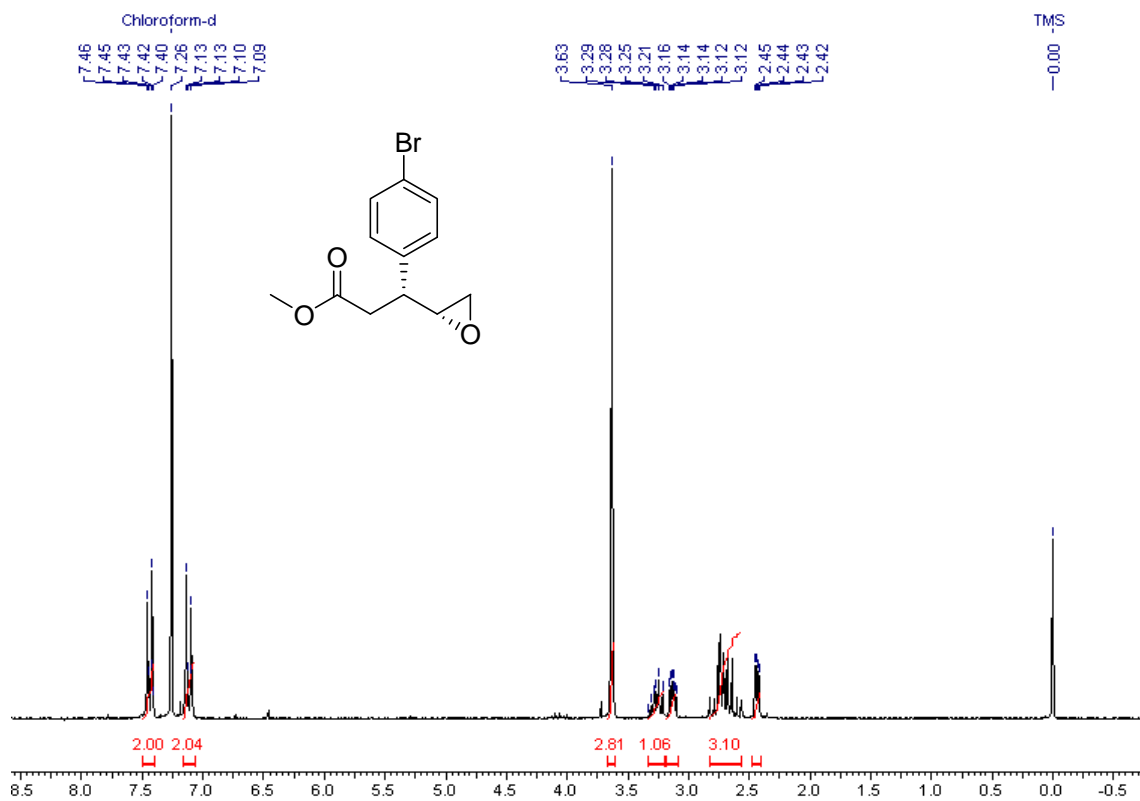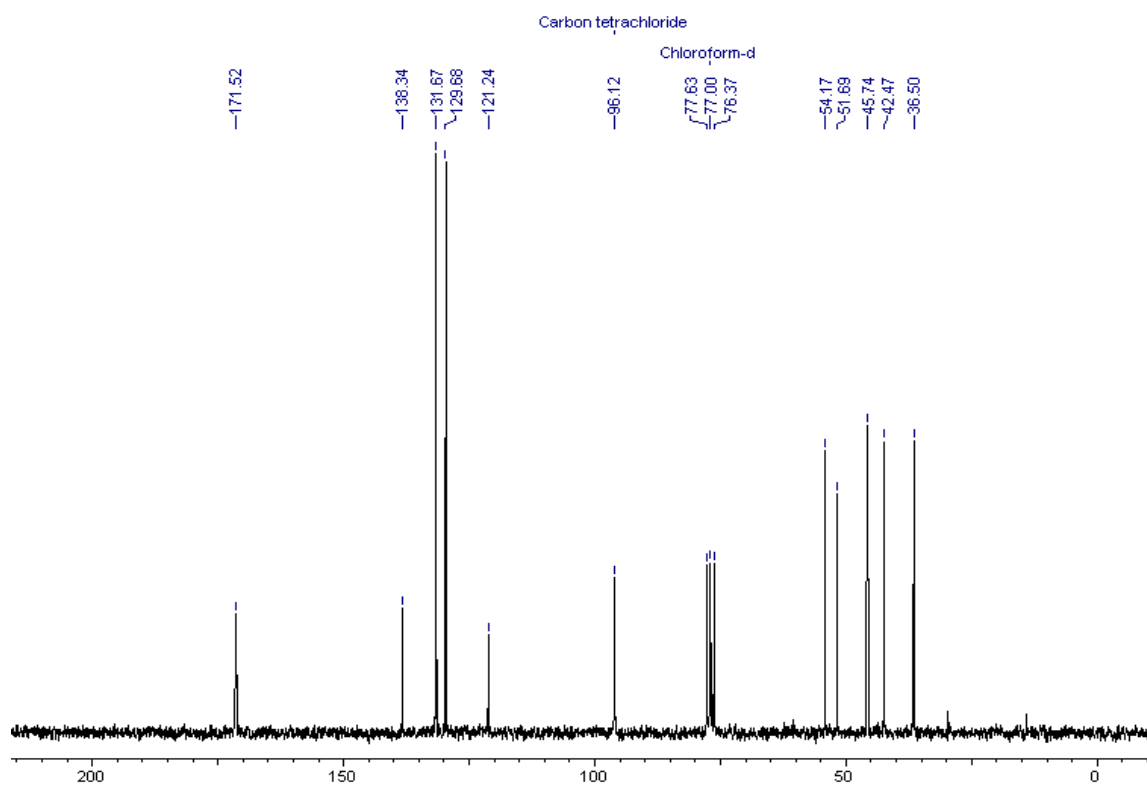

**(R)-methyl 3-(4-bromophenyl)-3-((R)-oxiran-2-yl)propanoate (12d)**

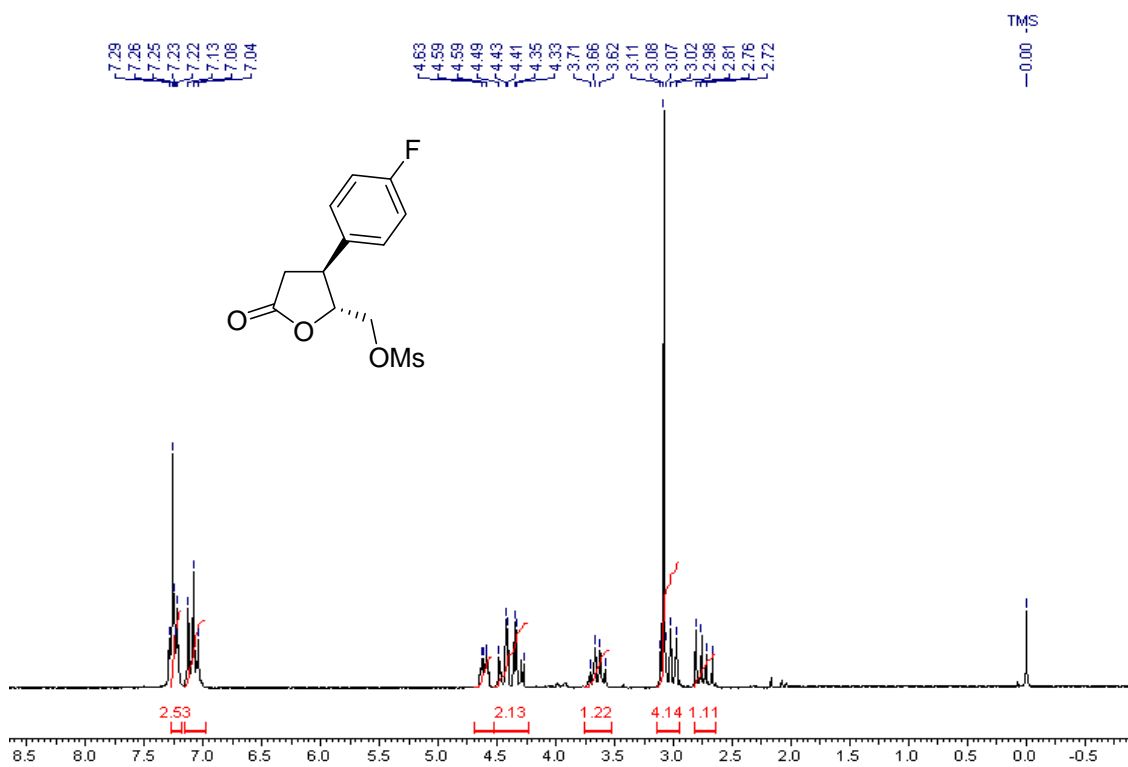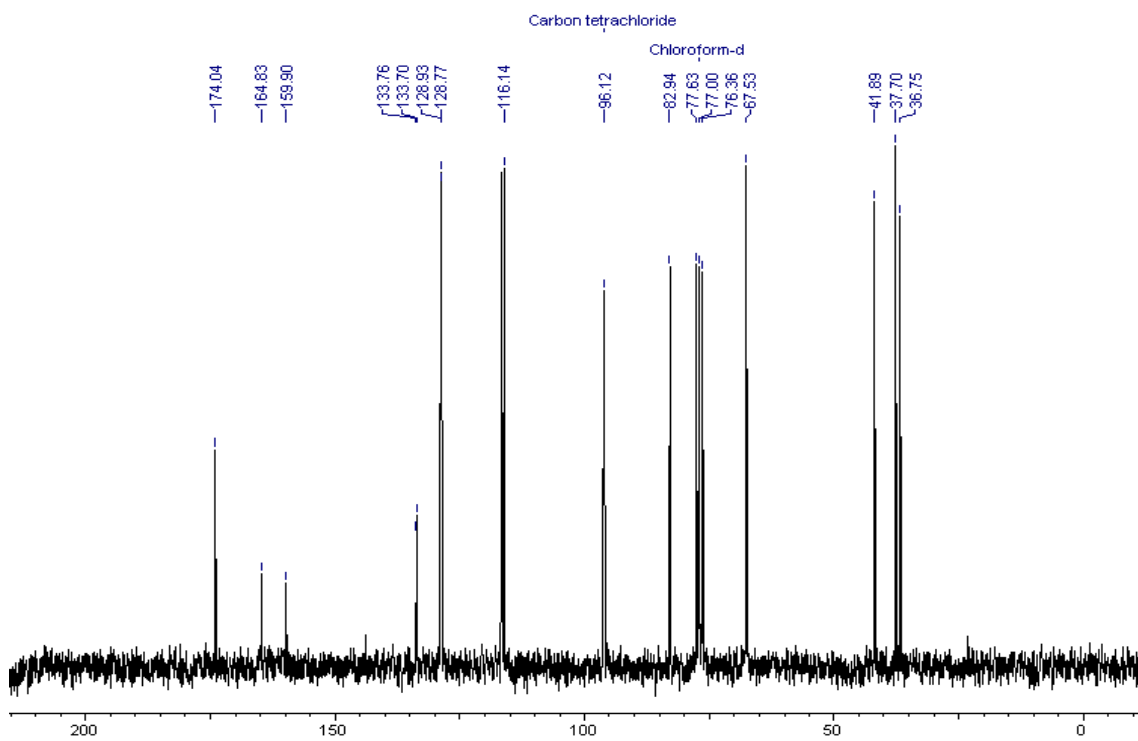

**((2*R*,3*S*)-3-(4-fluorophenyl)-5-oxotetrahydrofuran-2-yl)methyl methanesulfonate (17)**

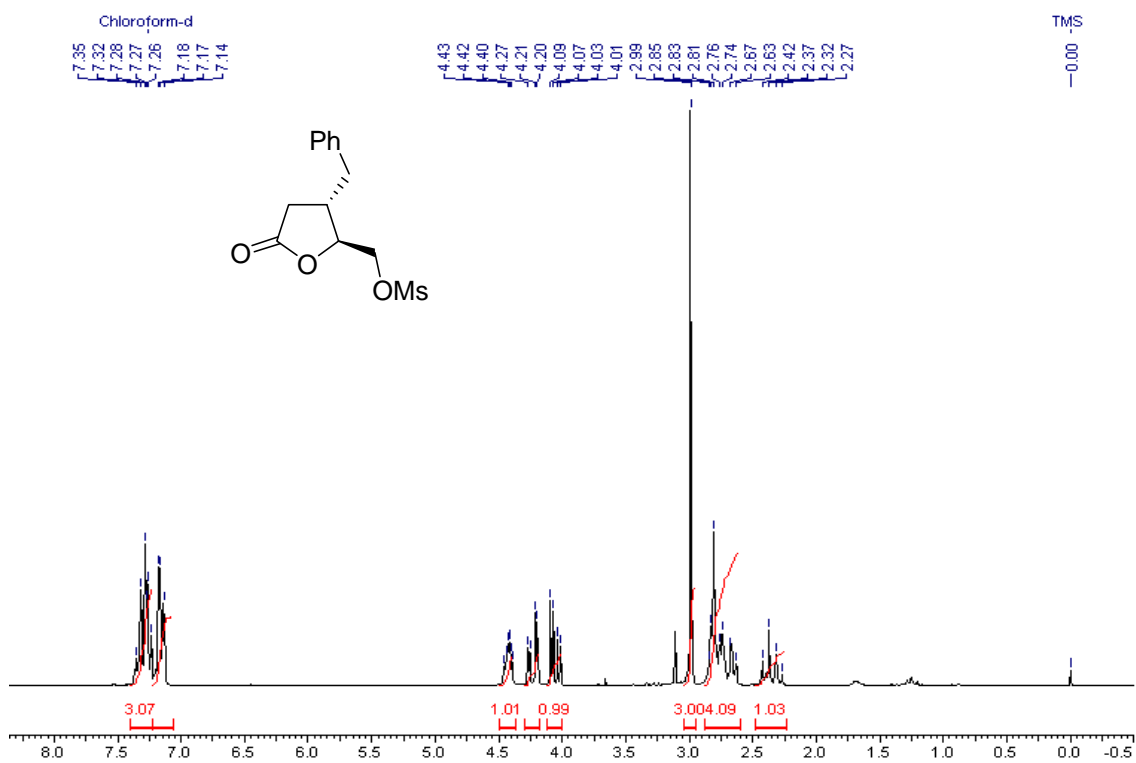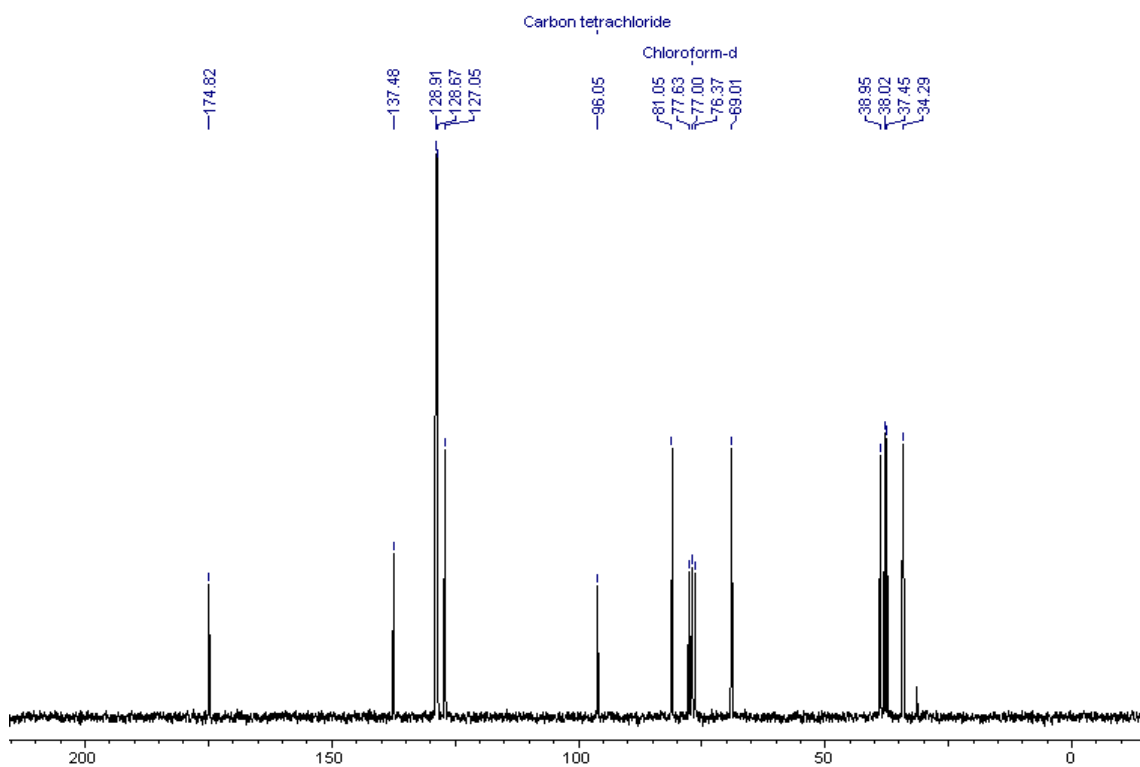

**((2S,3S)-3-benzyl-5-oxotetrahydrofuran-2-yl)methyl methanesulfonate (17a)**

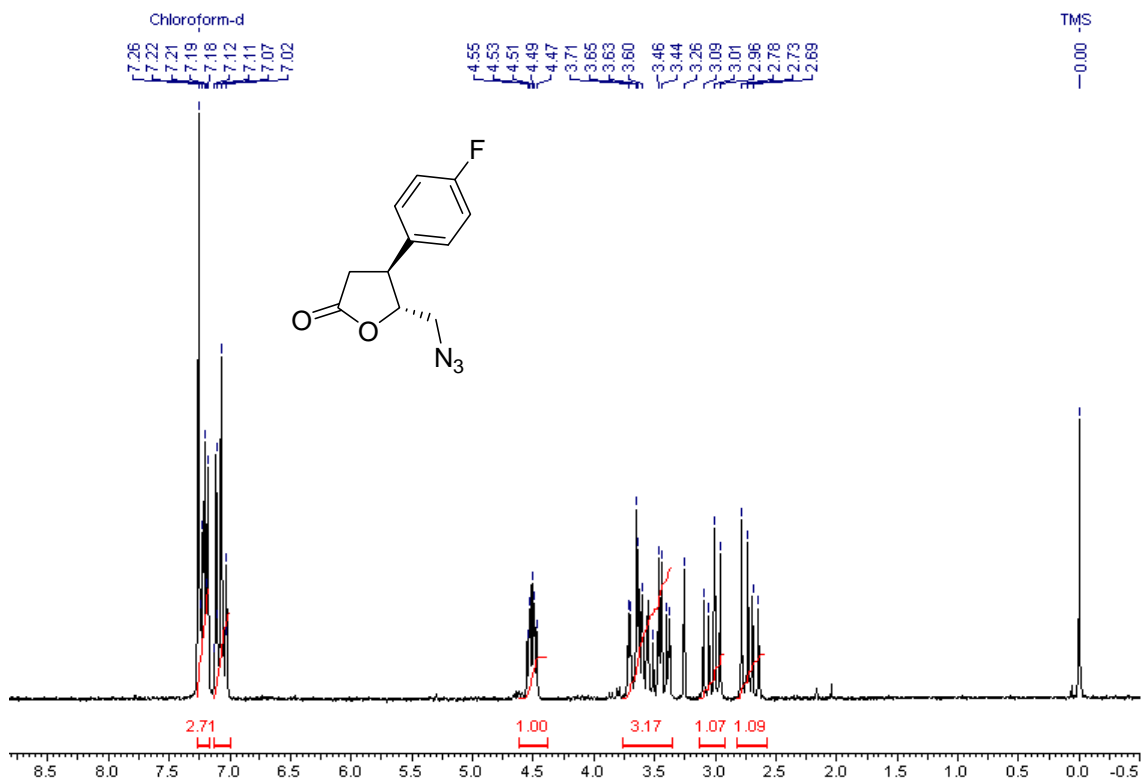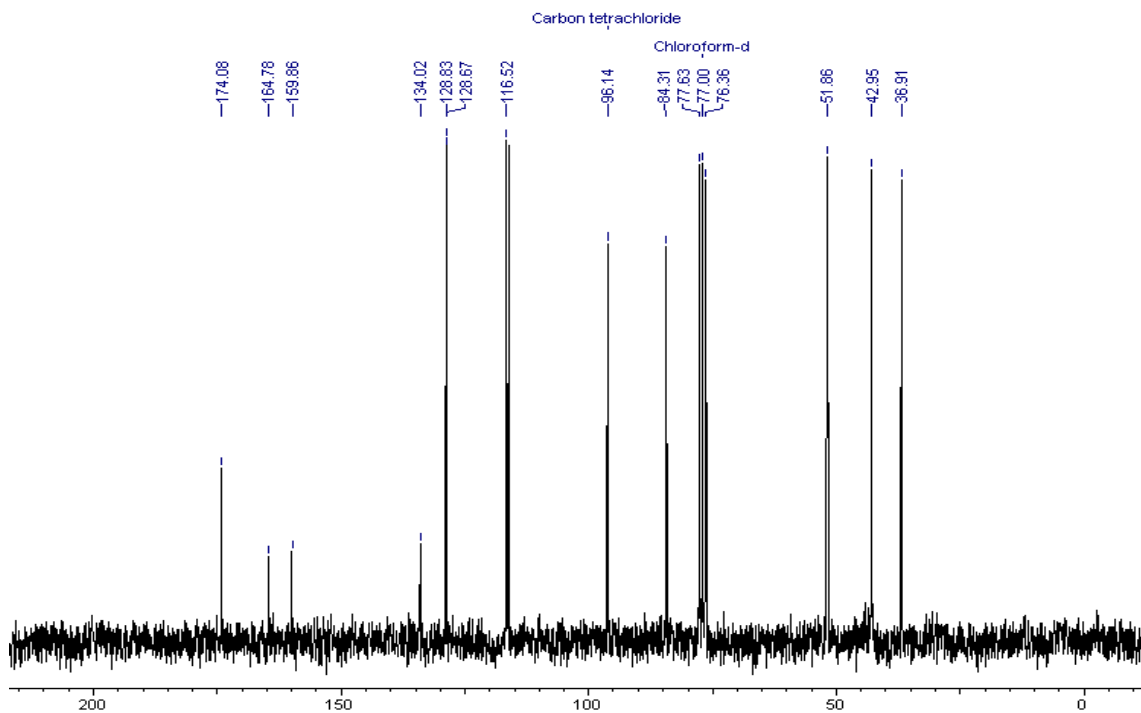

**(4*S*,5*R*)-5-(azidomethyl)-4-(4-fluorophenyl)dihydrofuran-2(3*H*)-one (18)**

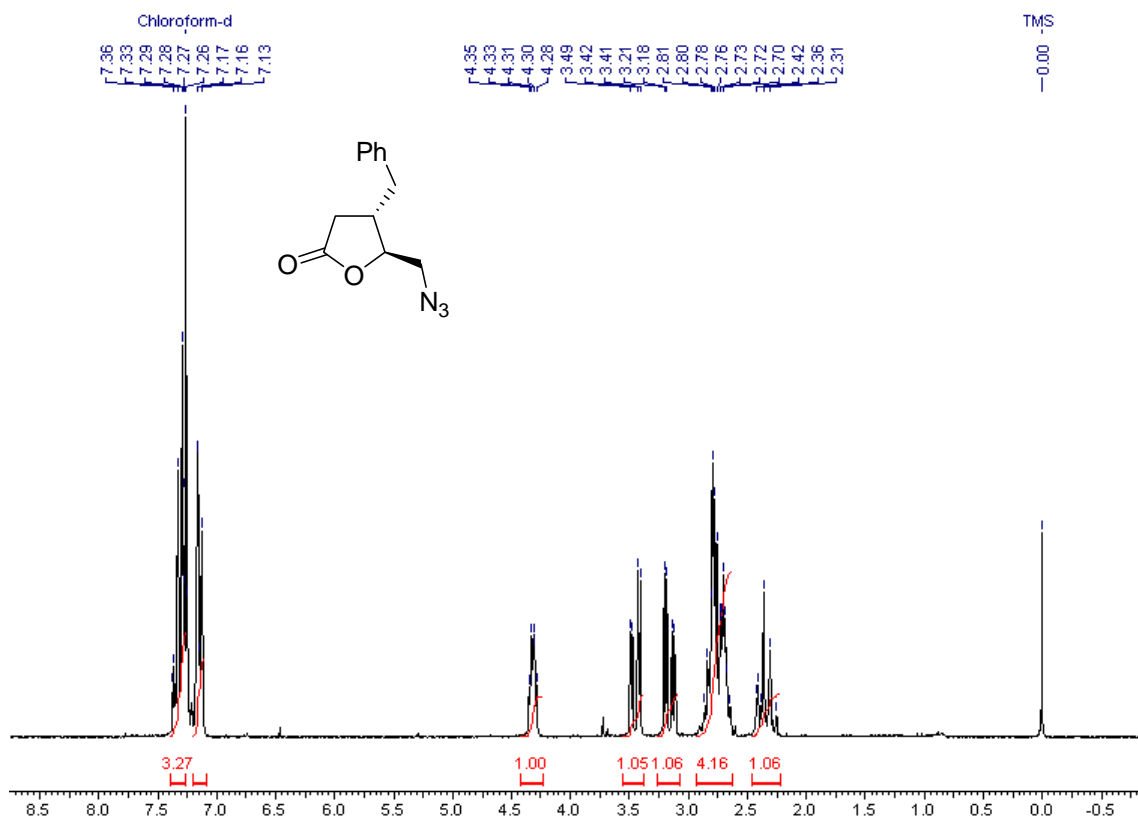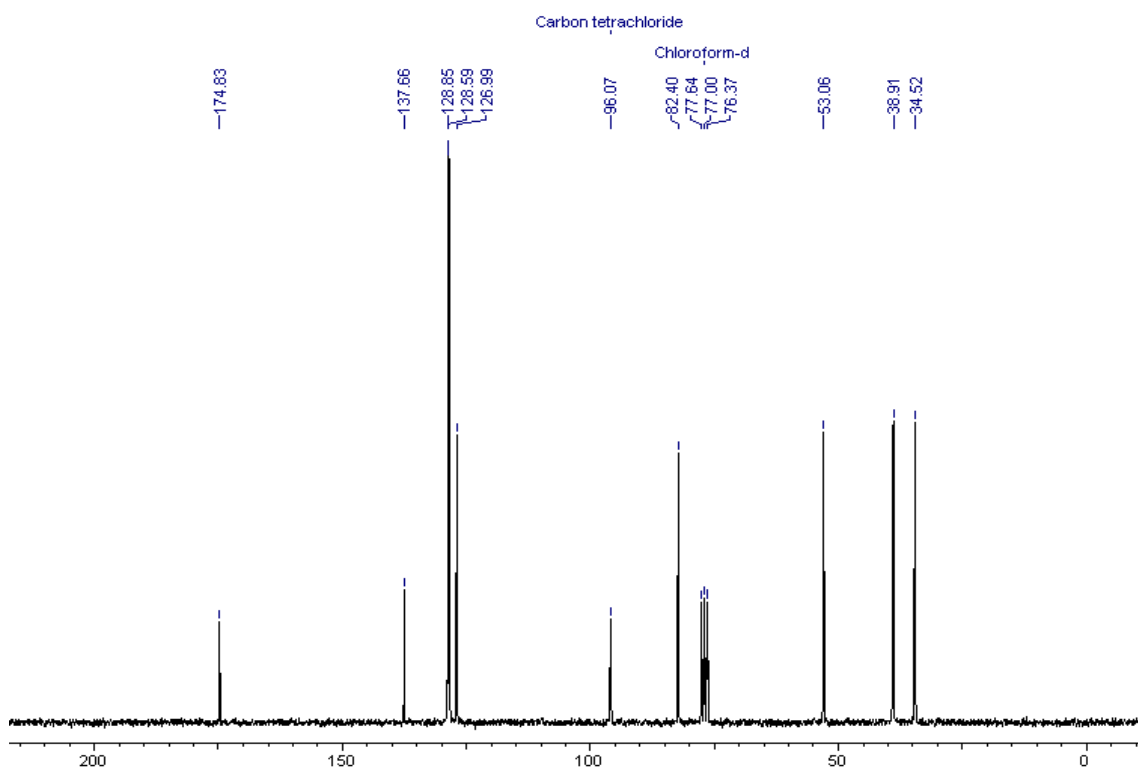

(4*S*,5*S*)-5-(azidomethyl)-4-benzylidihydrofuran-2(3*H*)-one (18a)

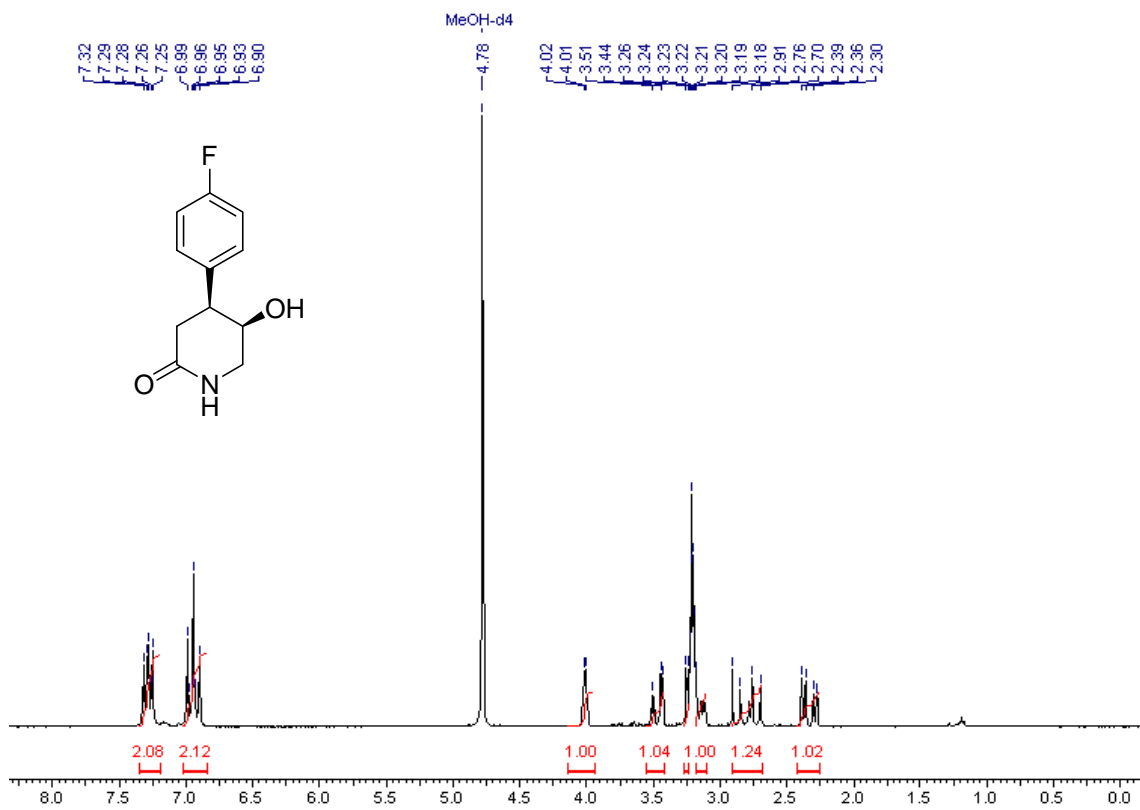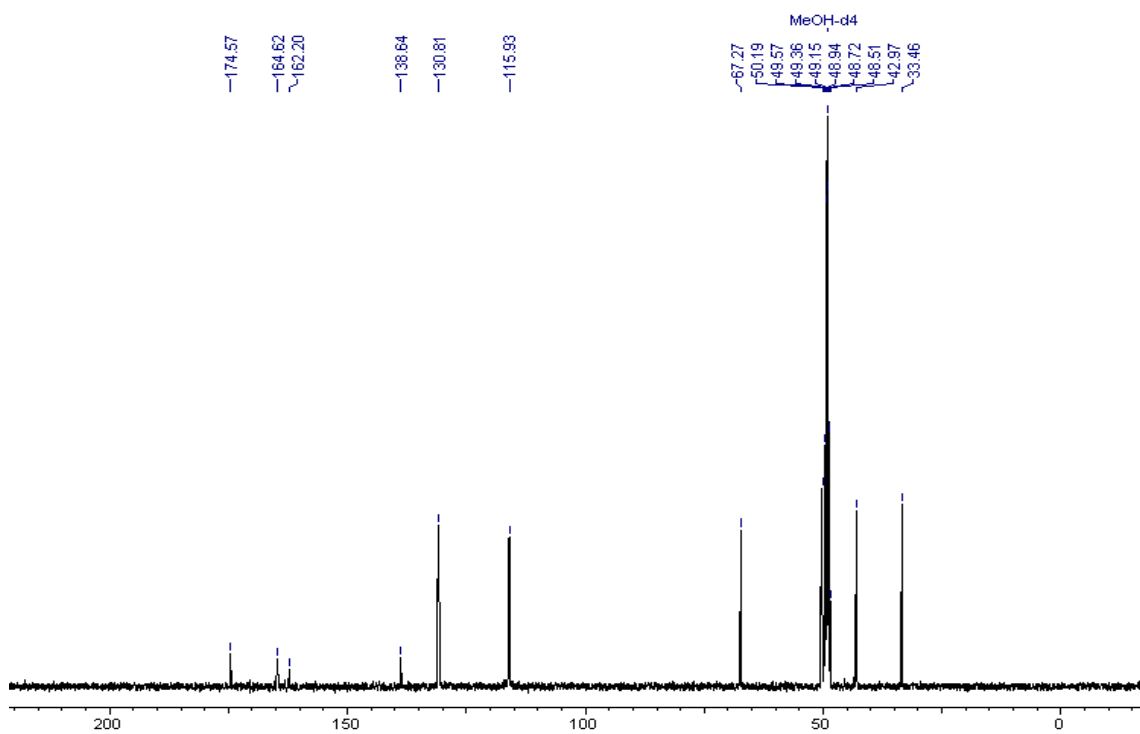

**(4*S*,5*R*)-4-(4-fluorophenyl)-5-hydroxypiperidin-2-one (19)**



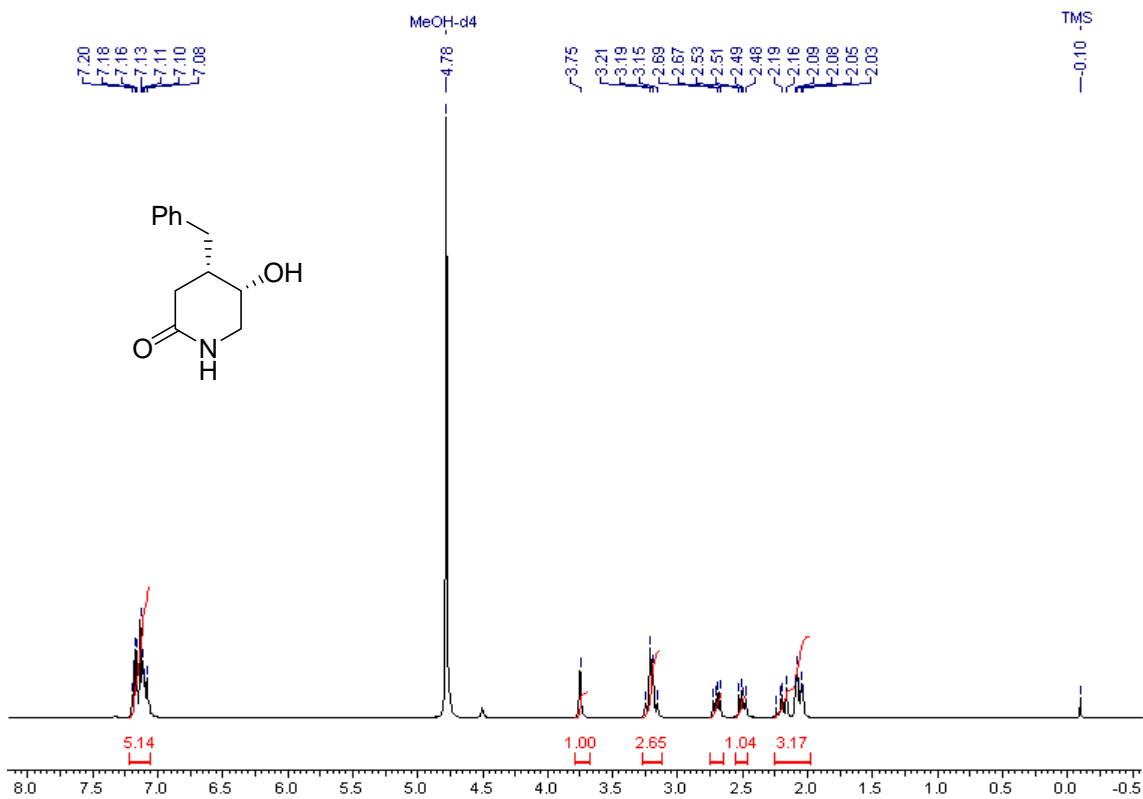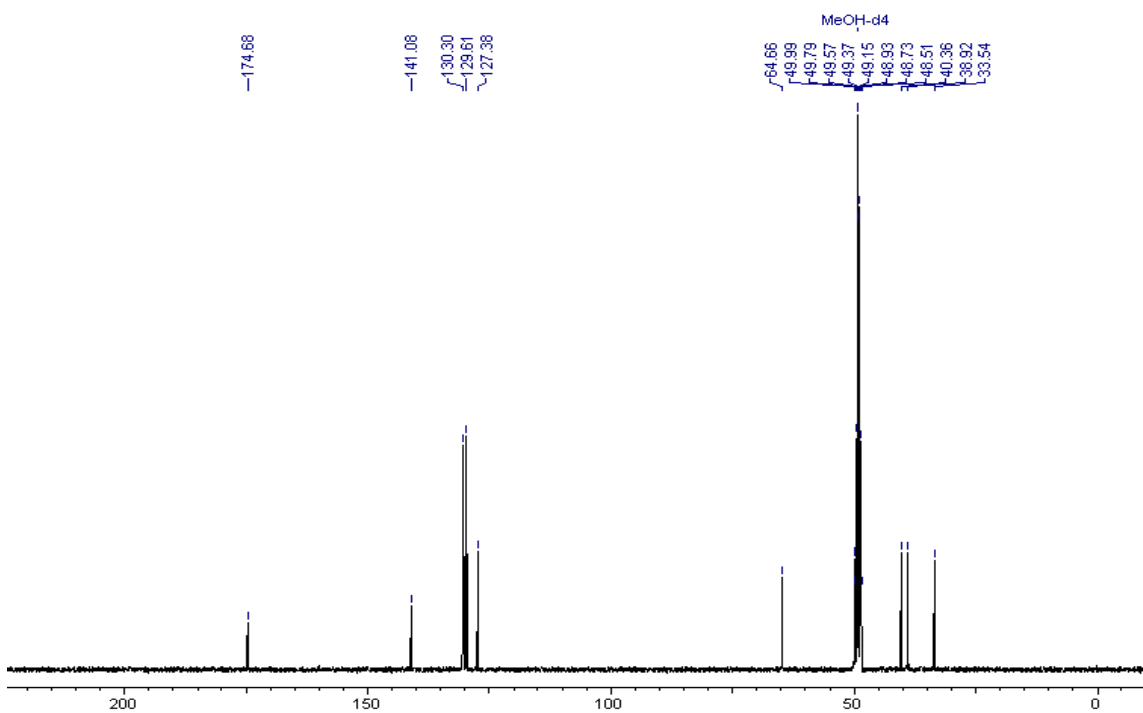

(4*S*,5*S*)-4-benzyl-5-hydroxypiperidin-2-one (19a)

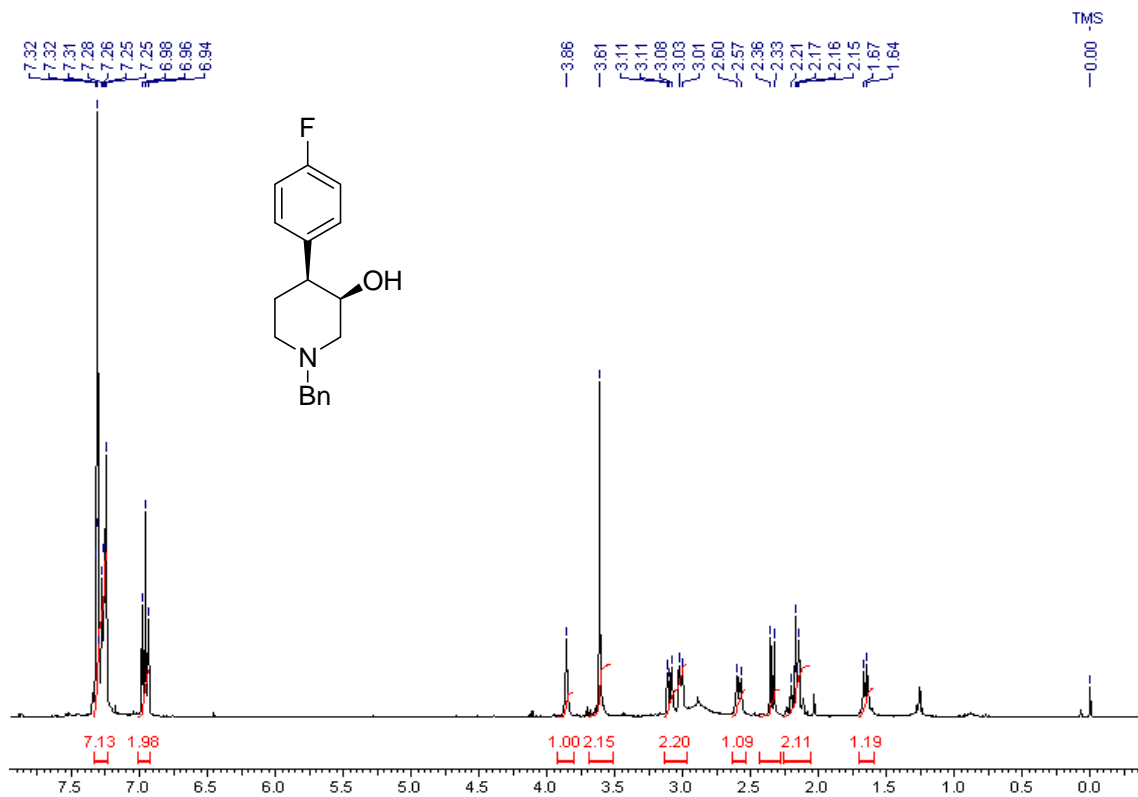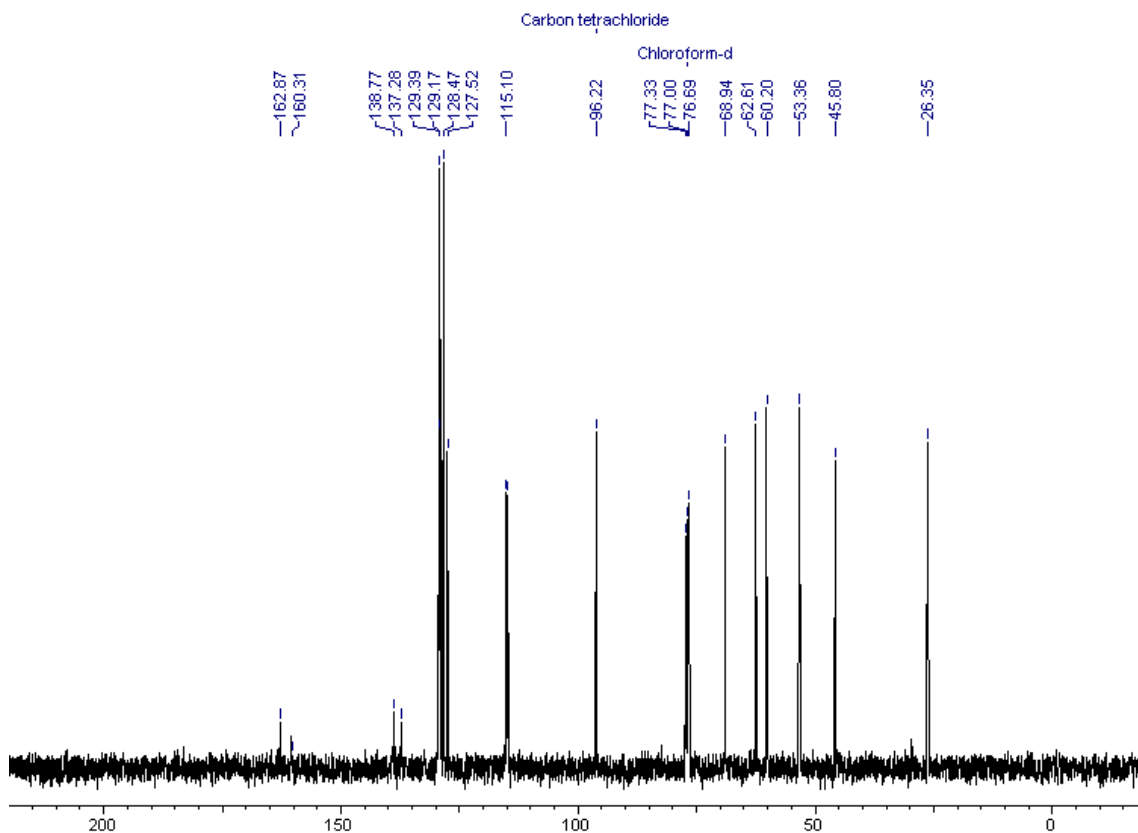

**2.6 (3R,4S)-1-benzyl-4-(4-fluorophenyl)piperidin-3-ol (20)**

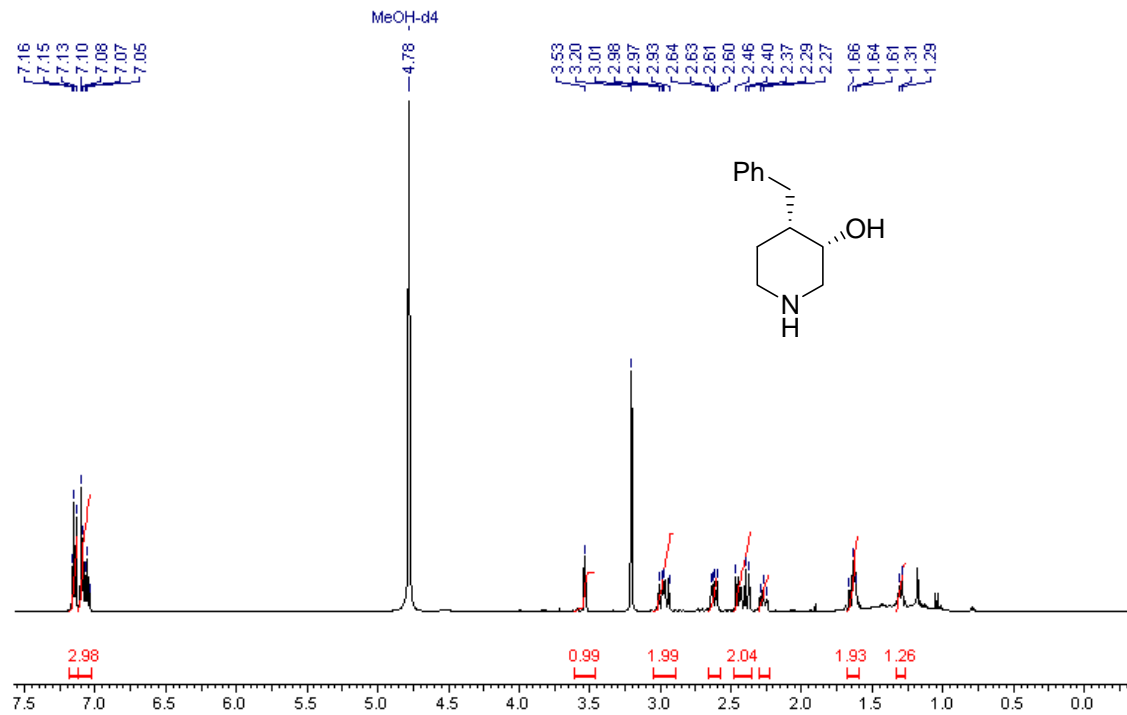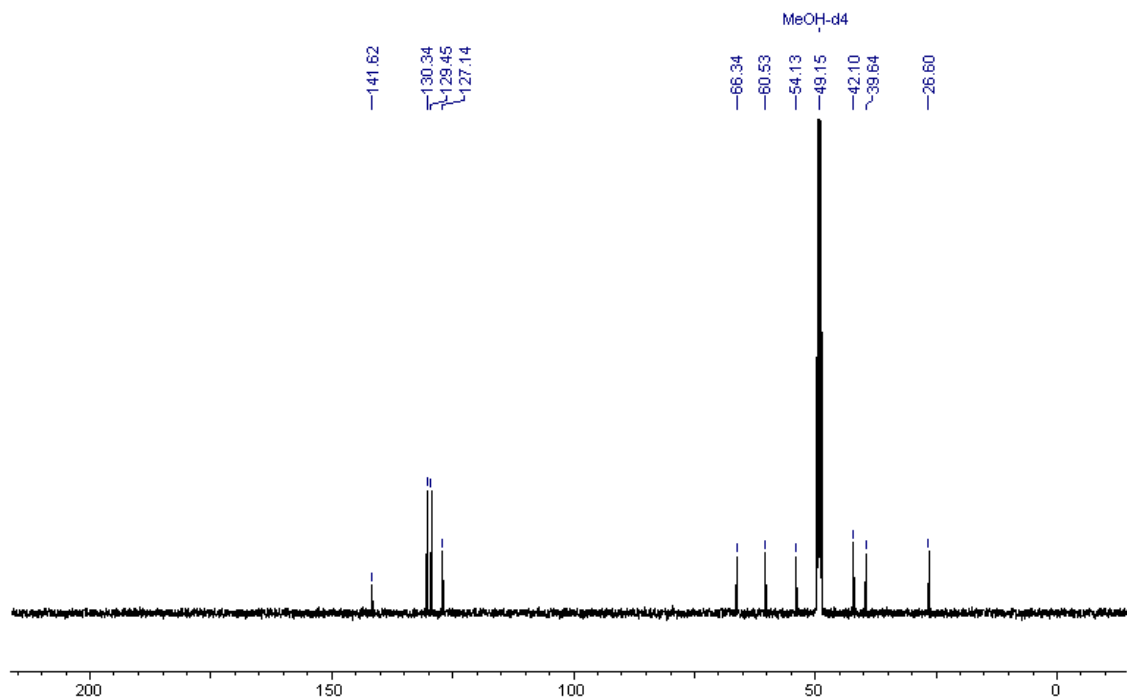

(3S,4S)-4-benzylpiperidin-3-ol (4)

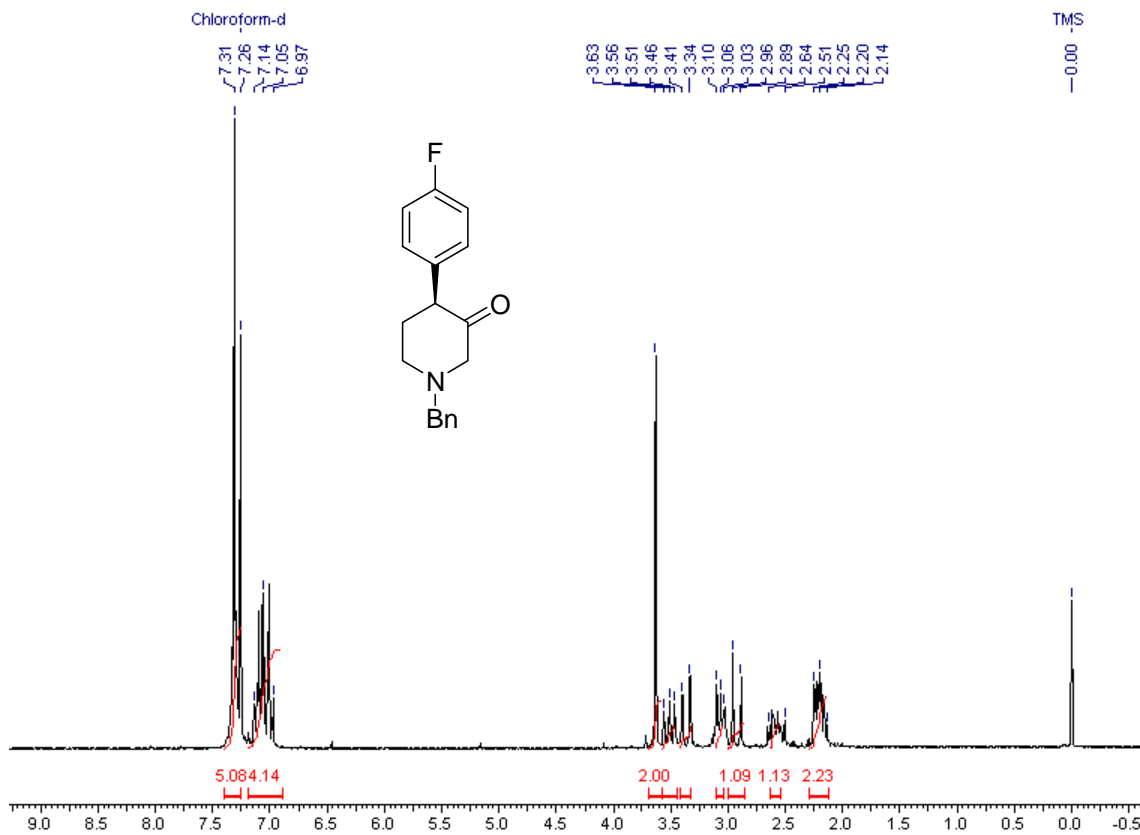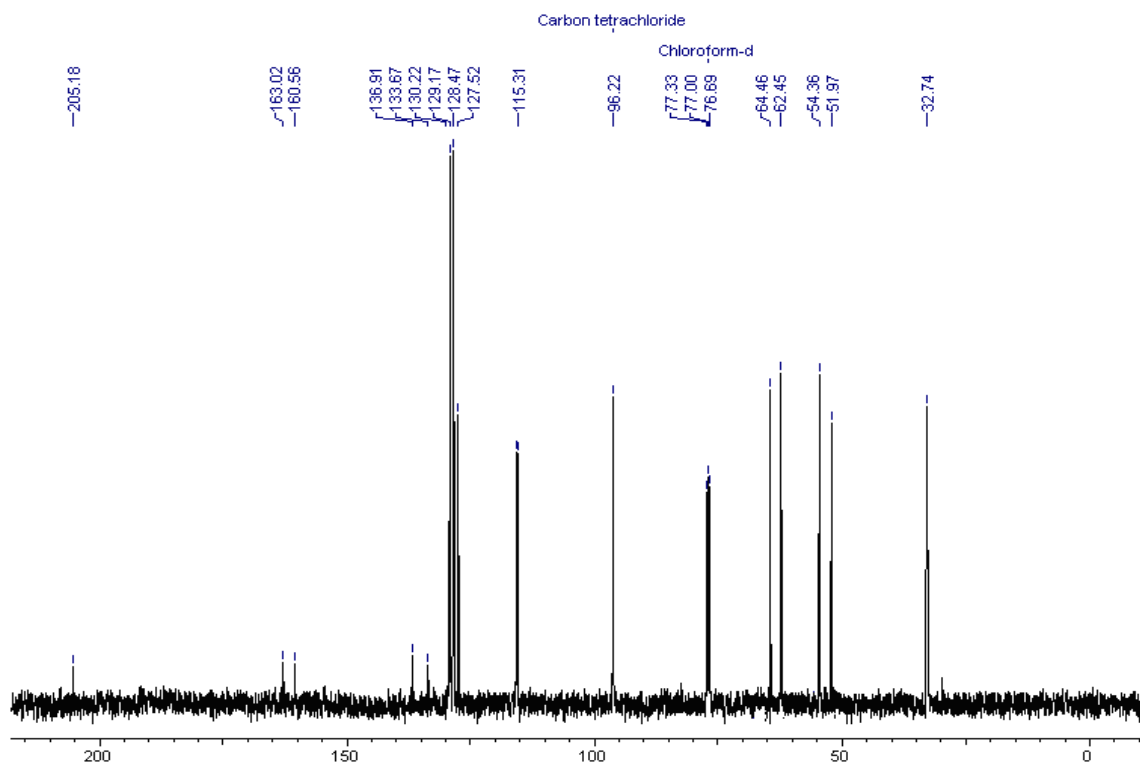

**(S)-1-benzyl-4-(4-fluorophenyl)piperidin-3-one (21)**

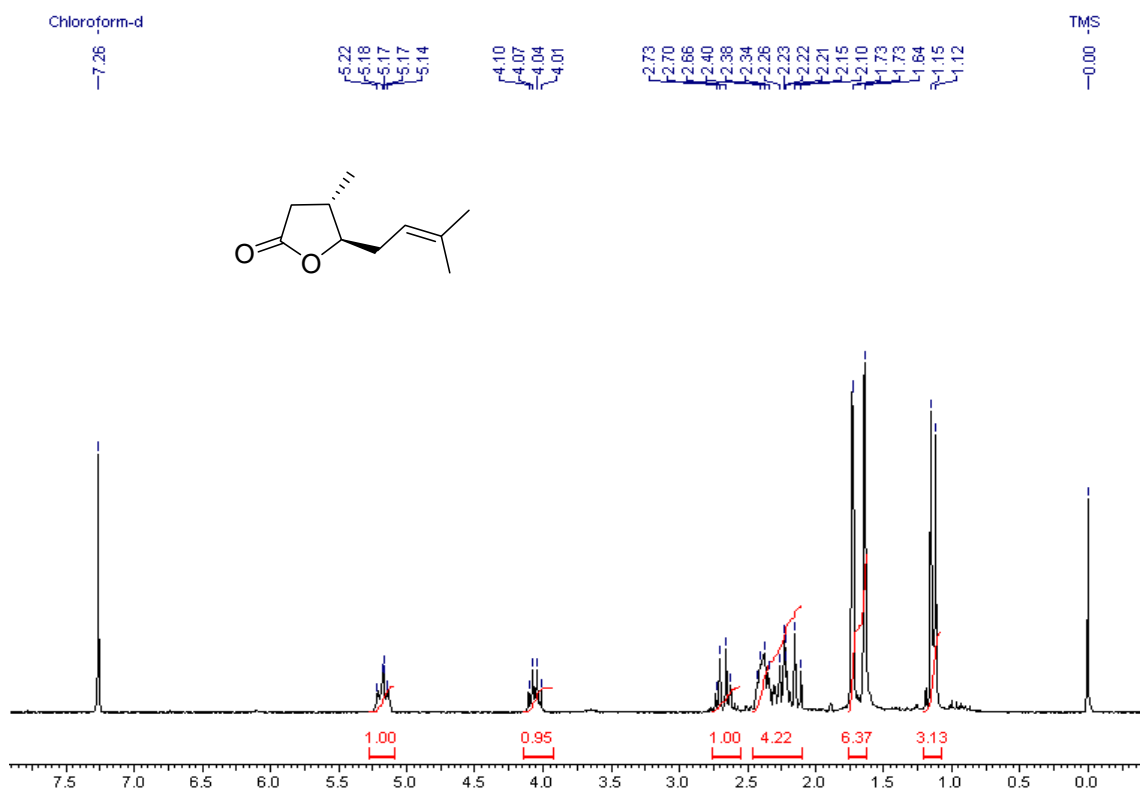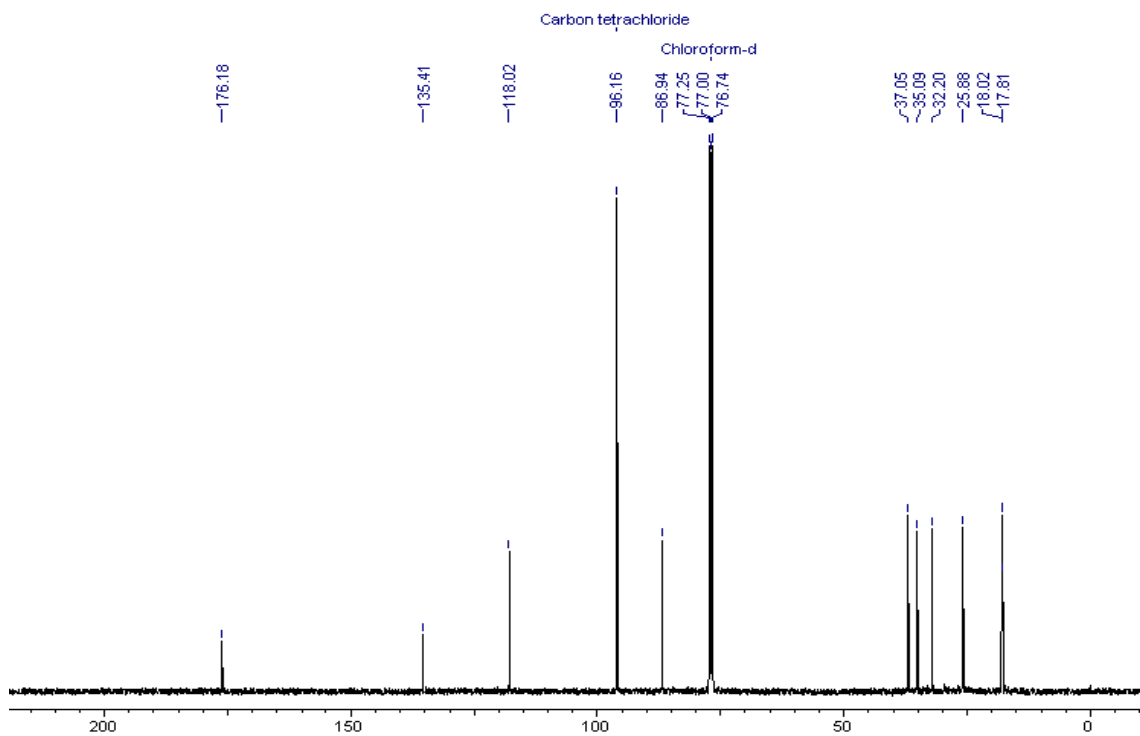

(+)-Eldanolide (1)

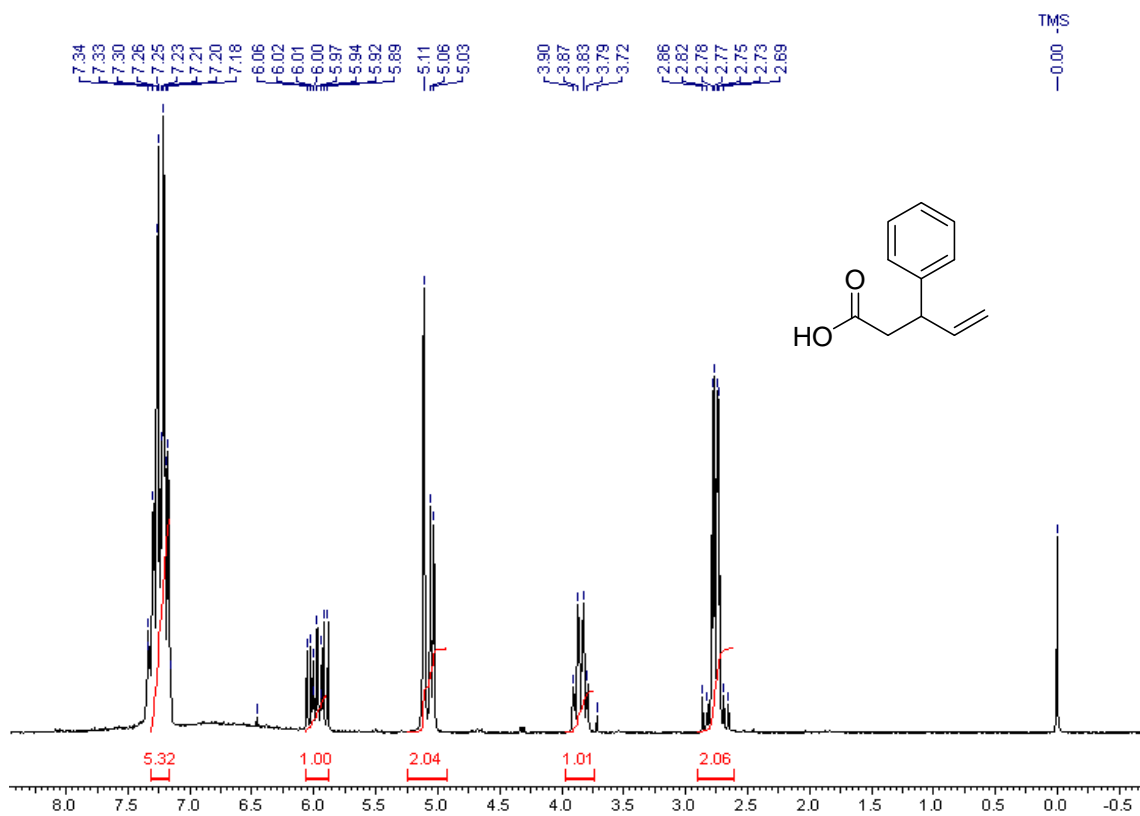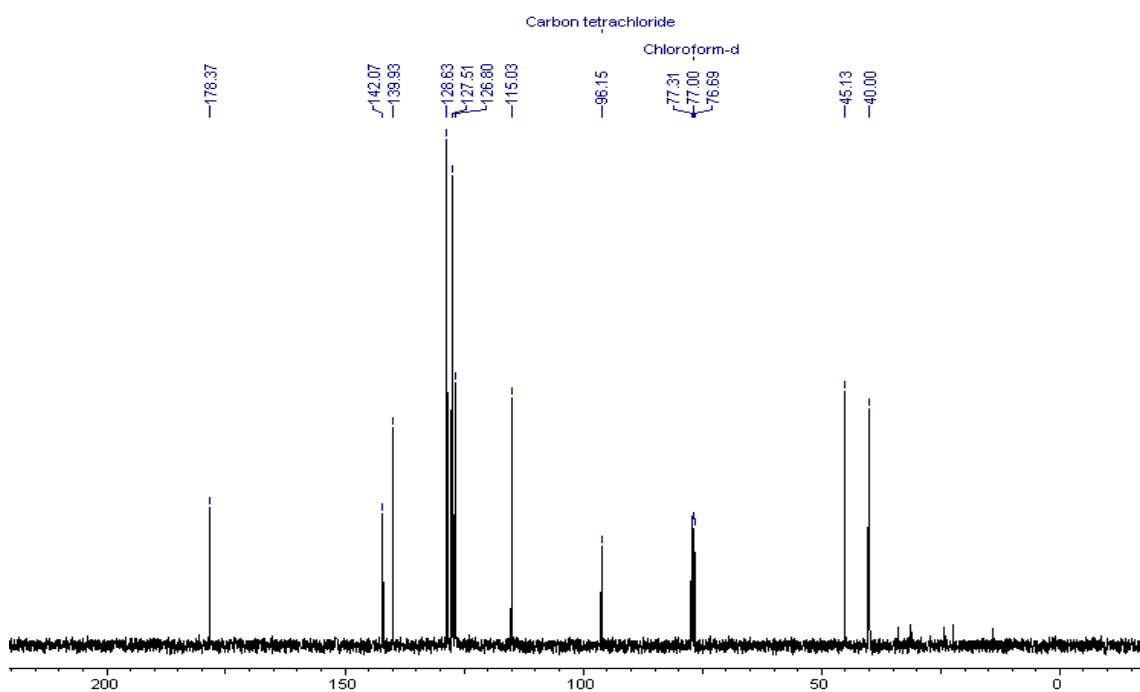

3-phenylpent-4-enoic acid (14a)

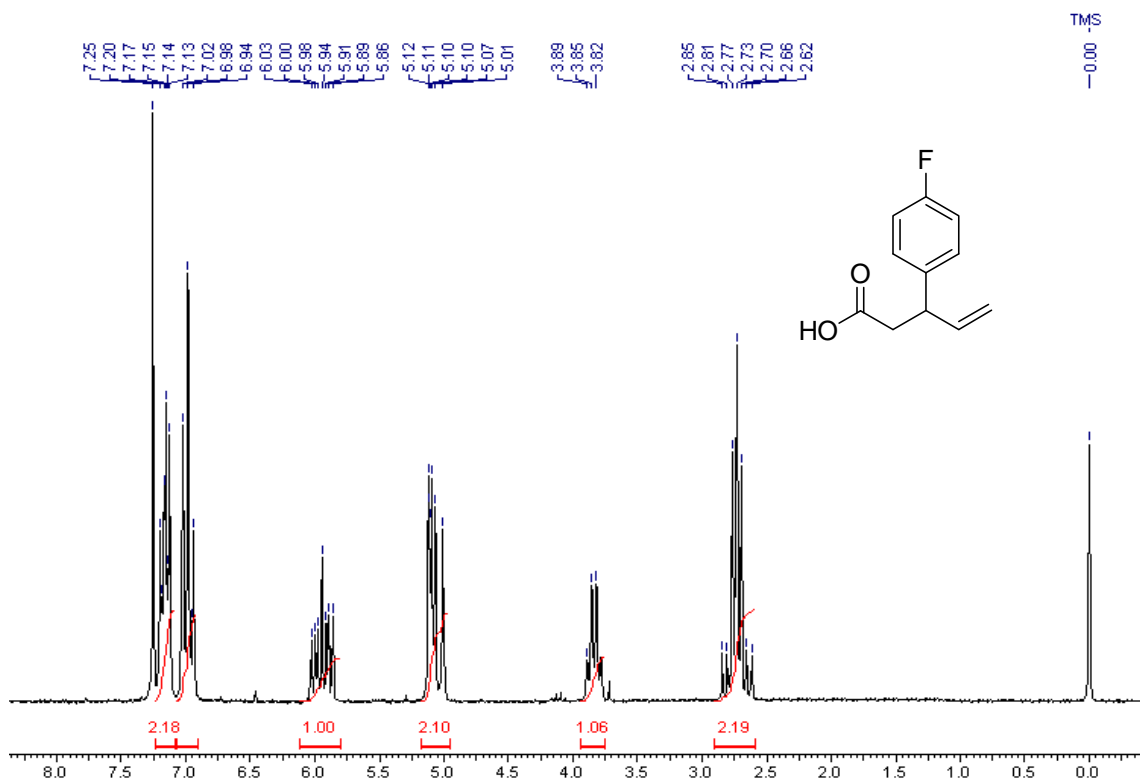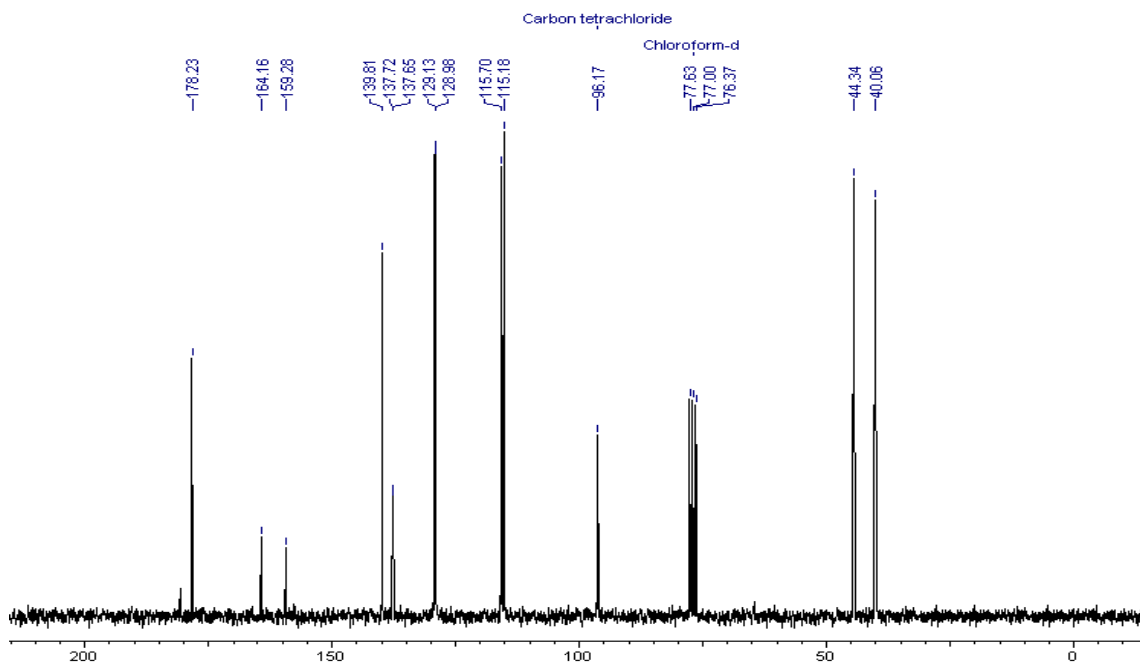

**3-(4-fluorophenyl)pent-4-enoic acid (14b)**

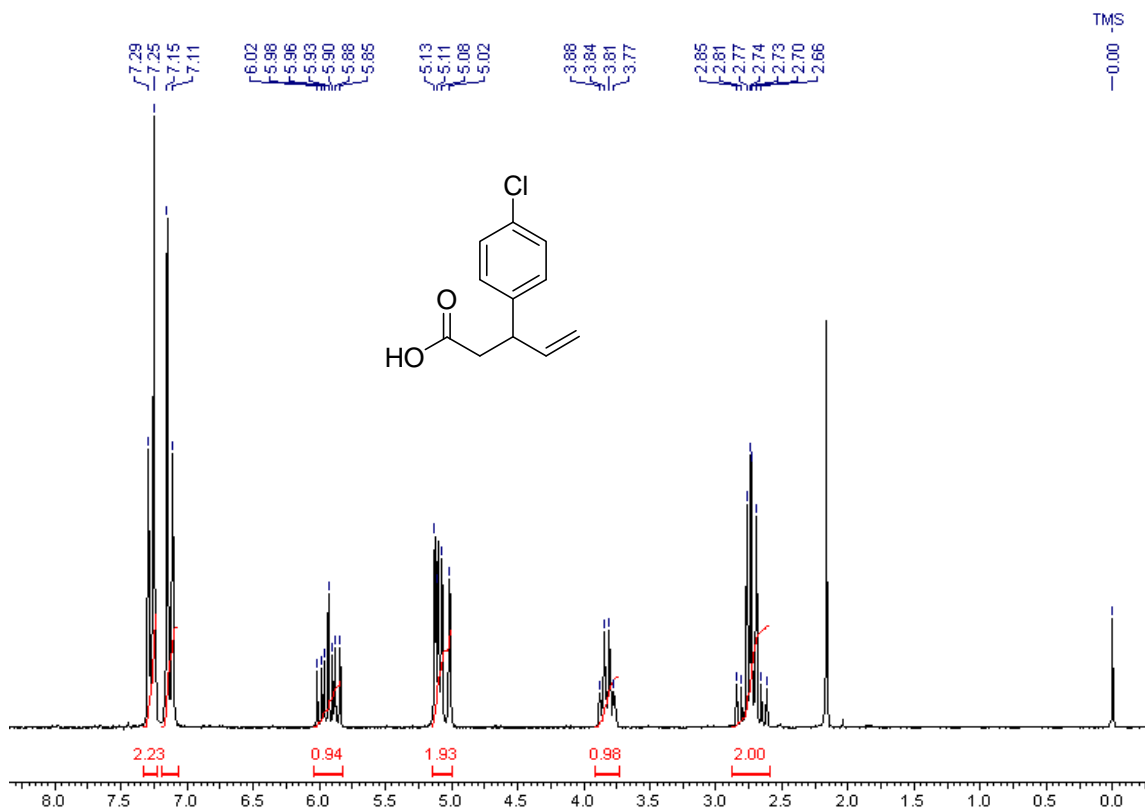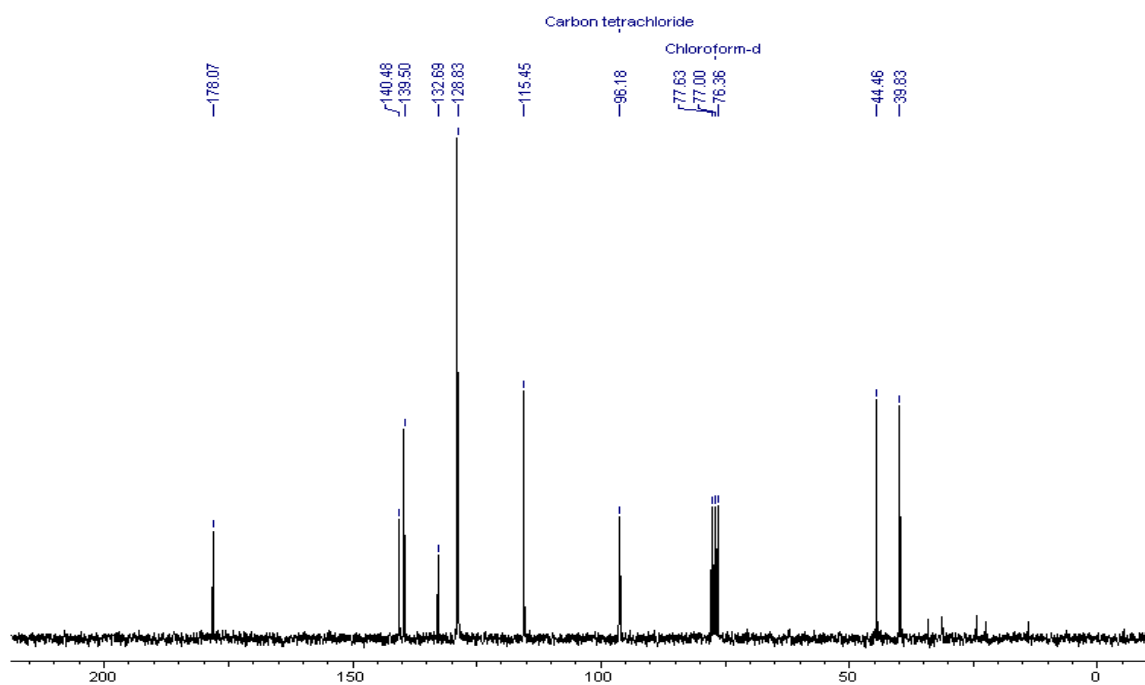

3-(4-chlorophenyl)pent-4-enoic acid (14c)



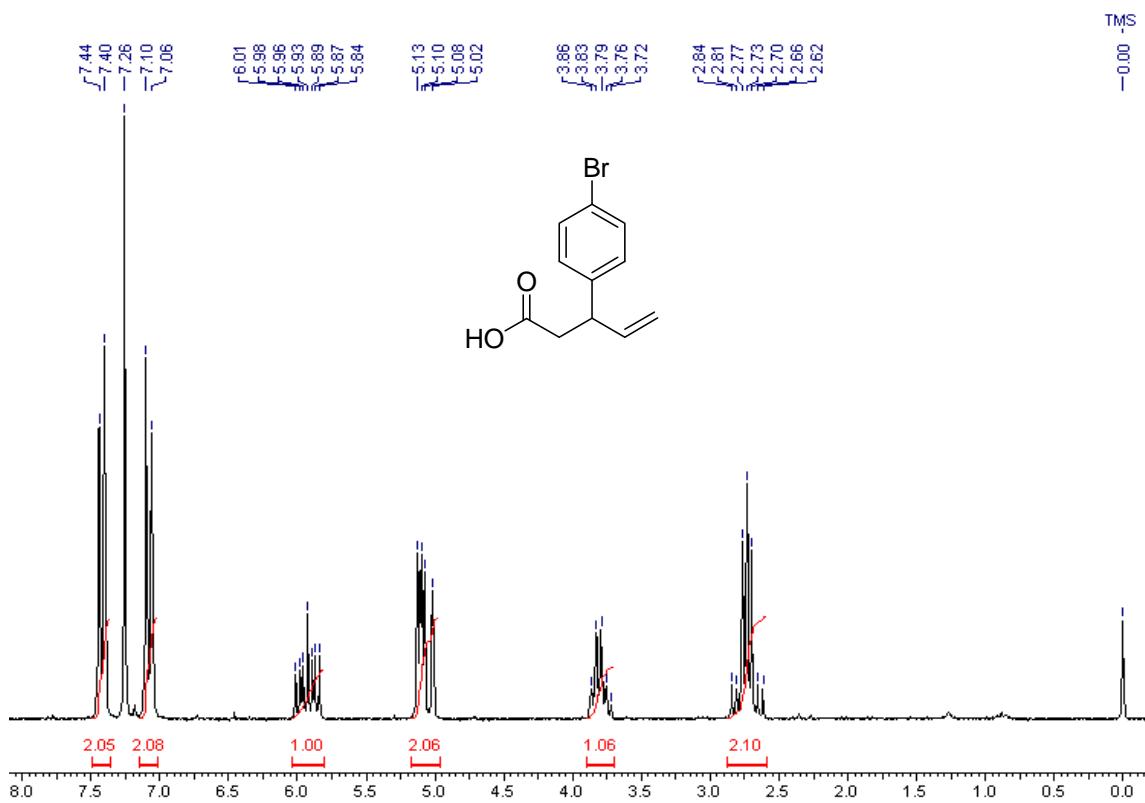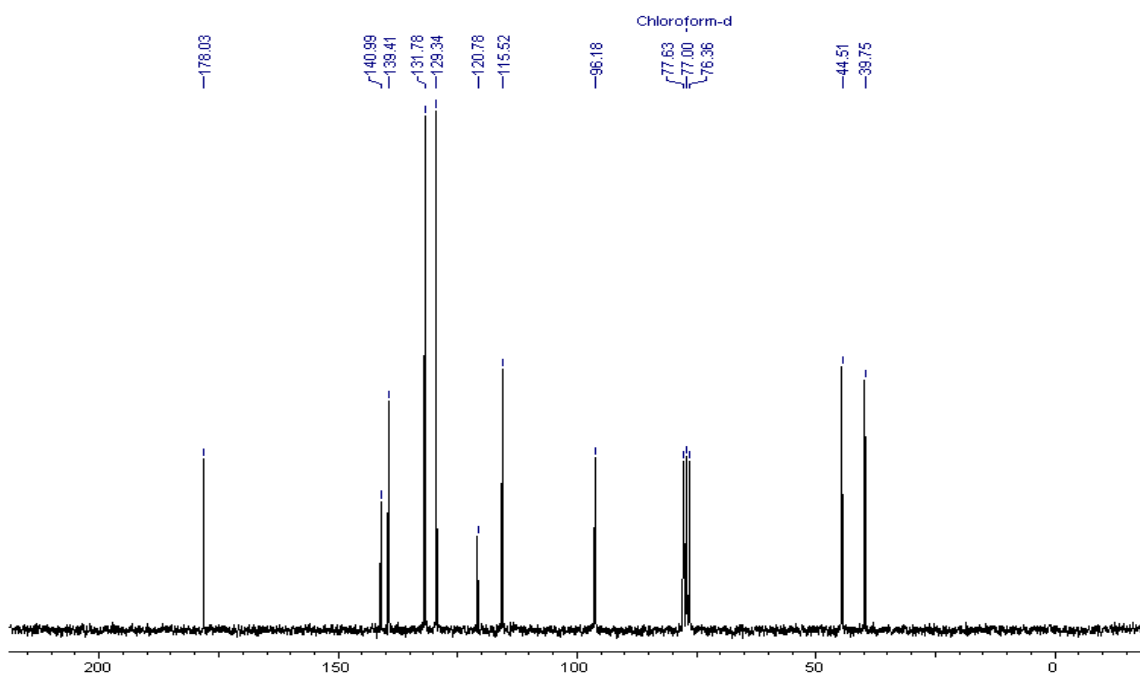

**3-(4-bromophenyl)pent-4-enoic acid (14d)**

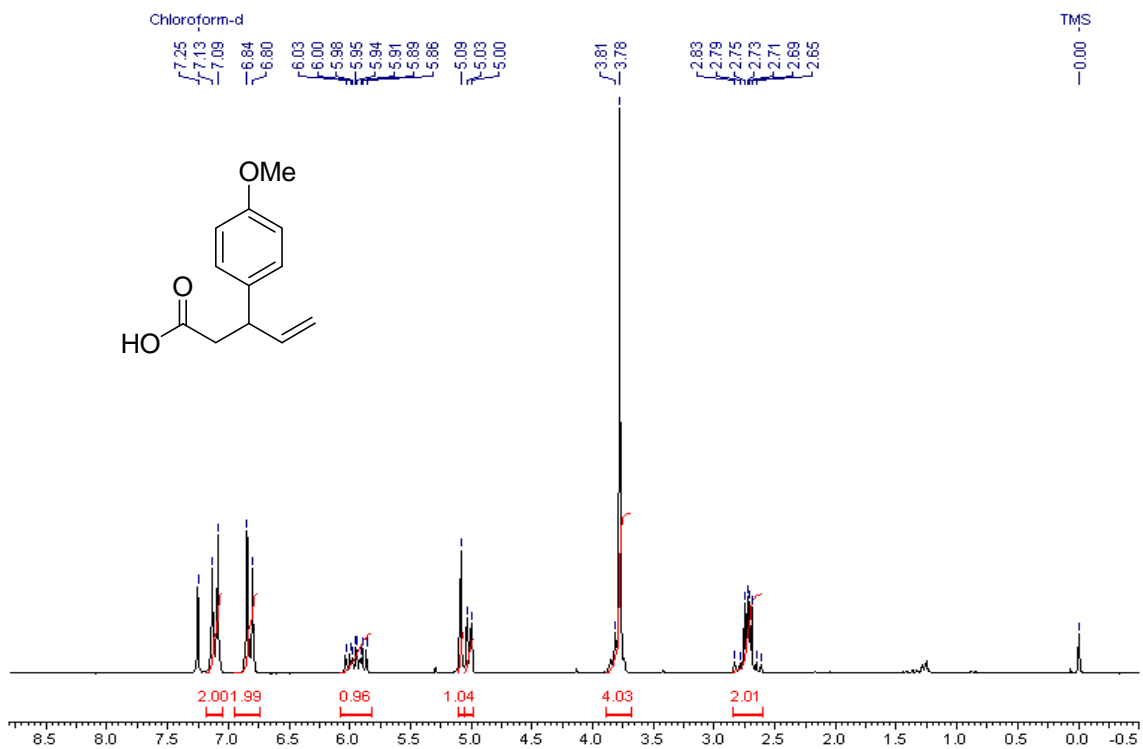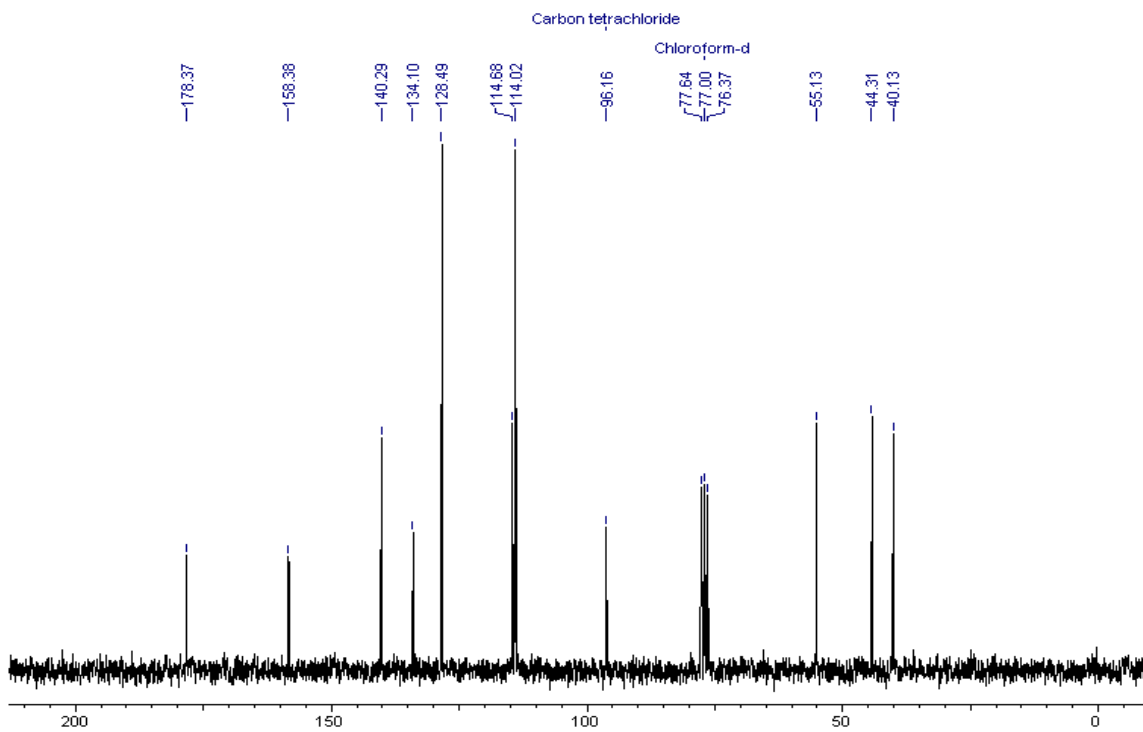

**3-(4-methoxyphenyl)pent-4-enoic acid (14e)**

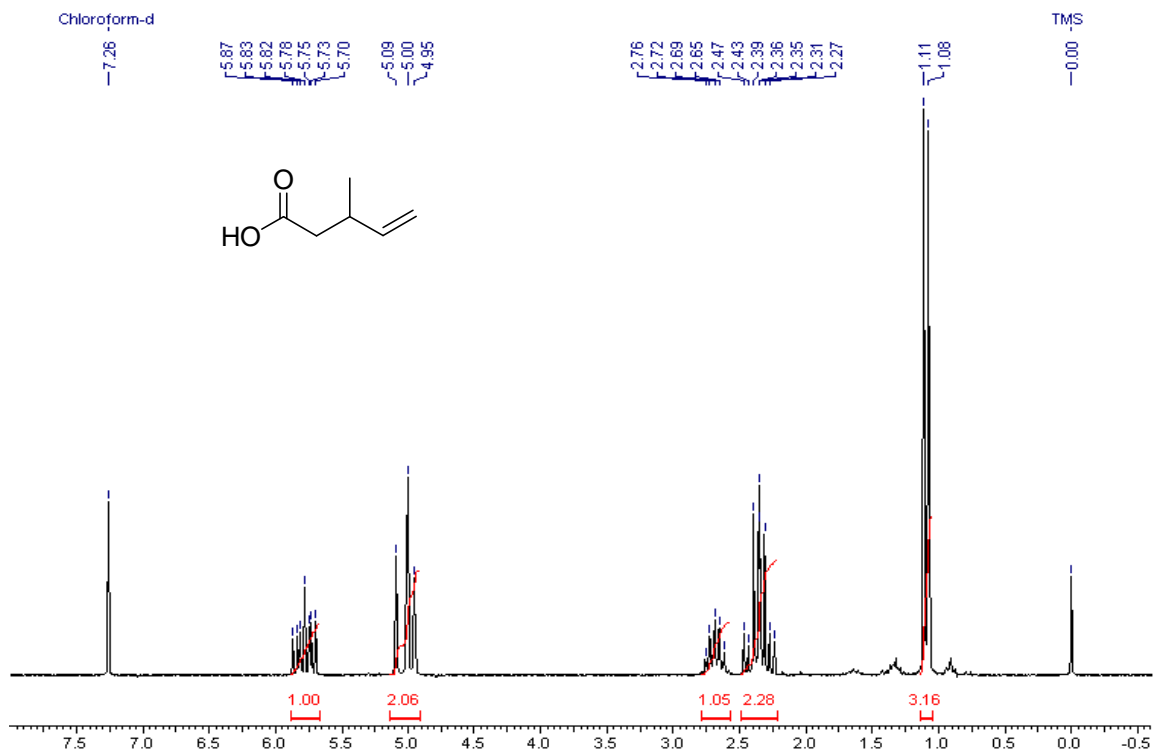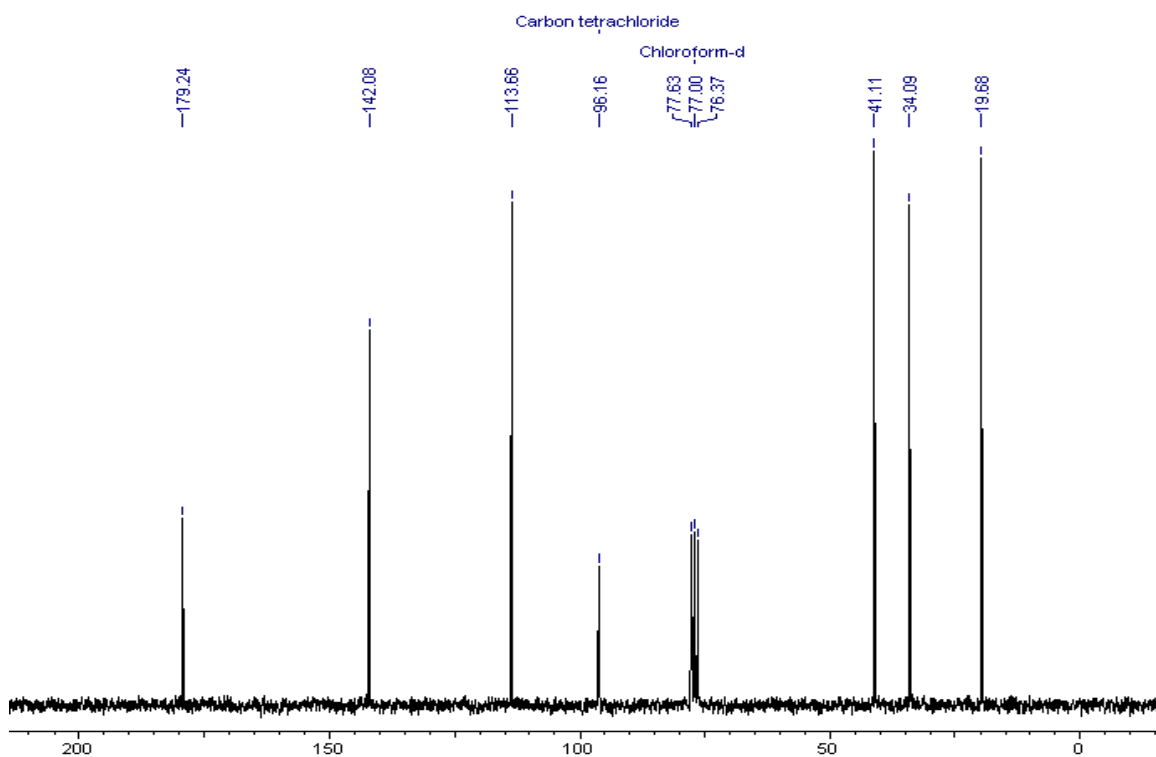

**3-methylpent-4-enoic acid (14f)**

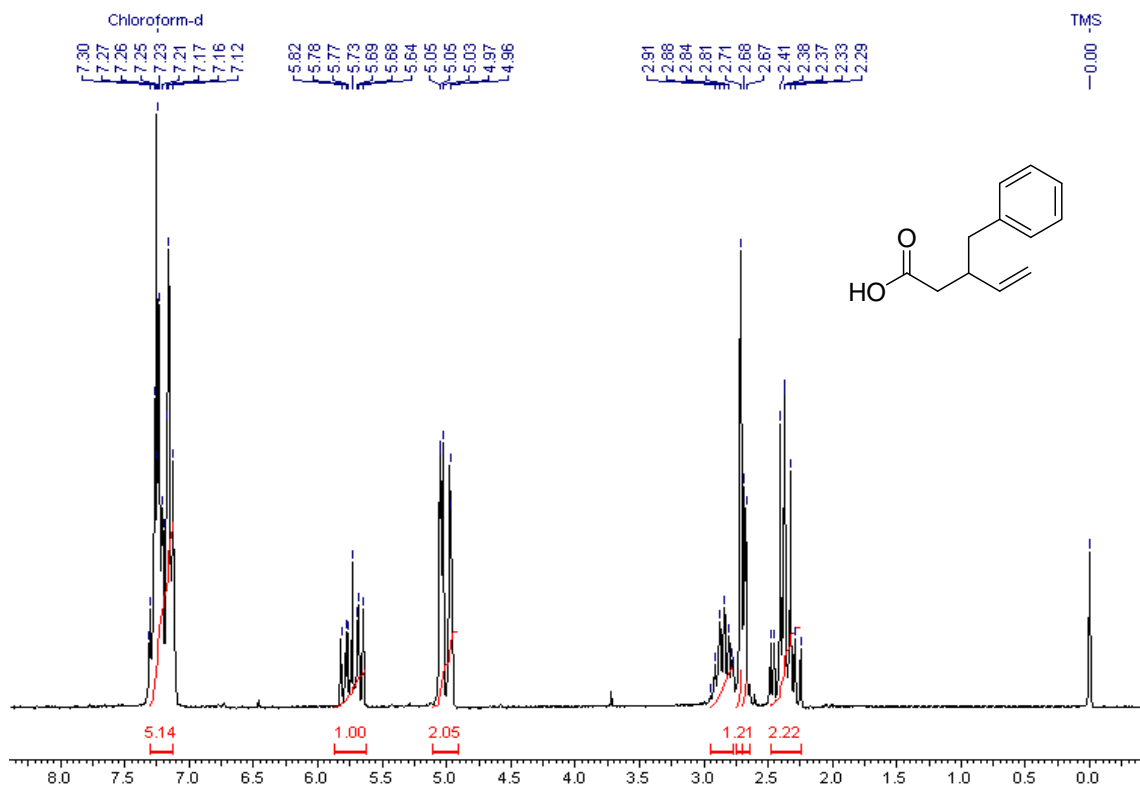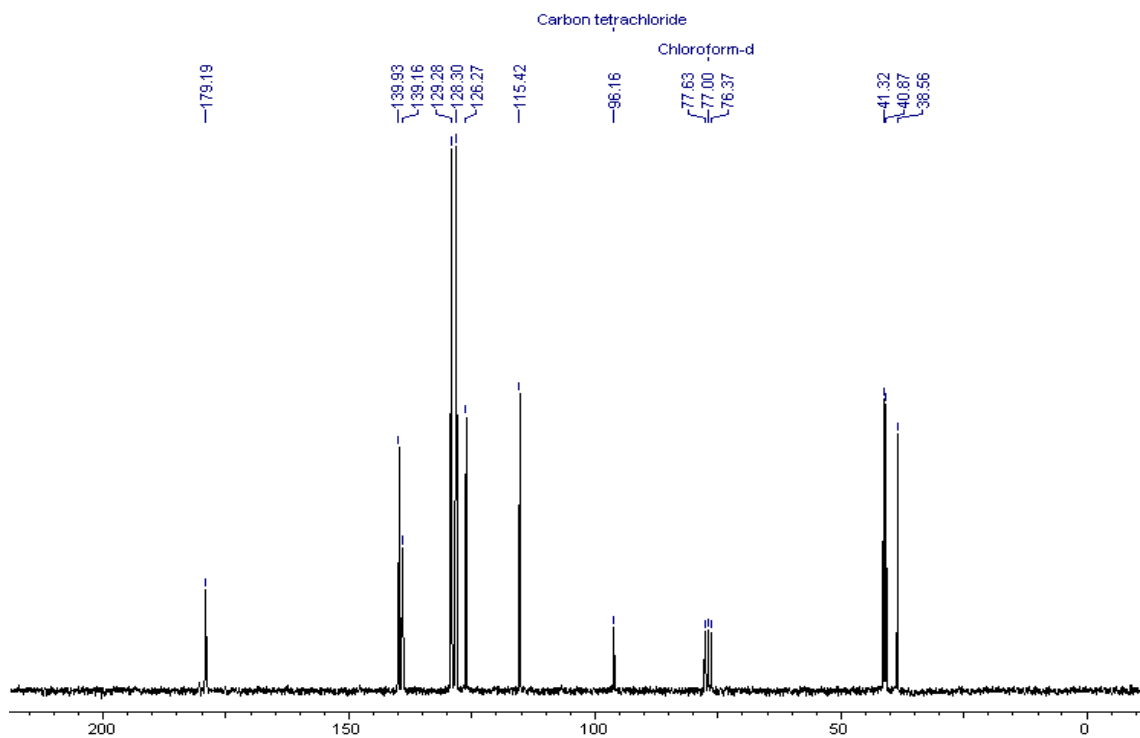

**3-benzylpent-4-enoic acid (14g)**

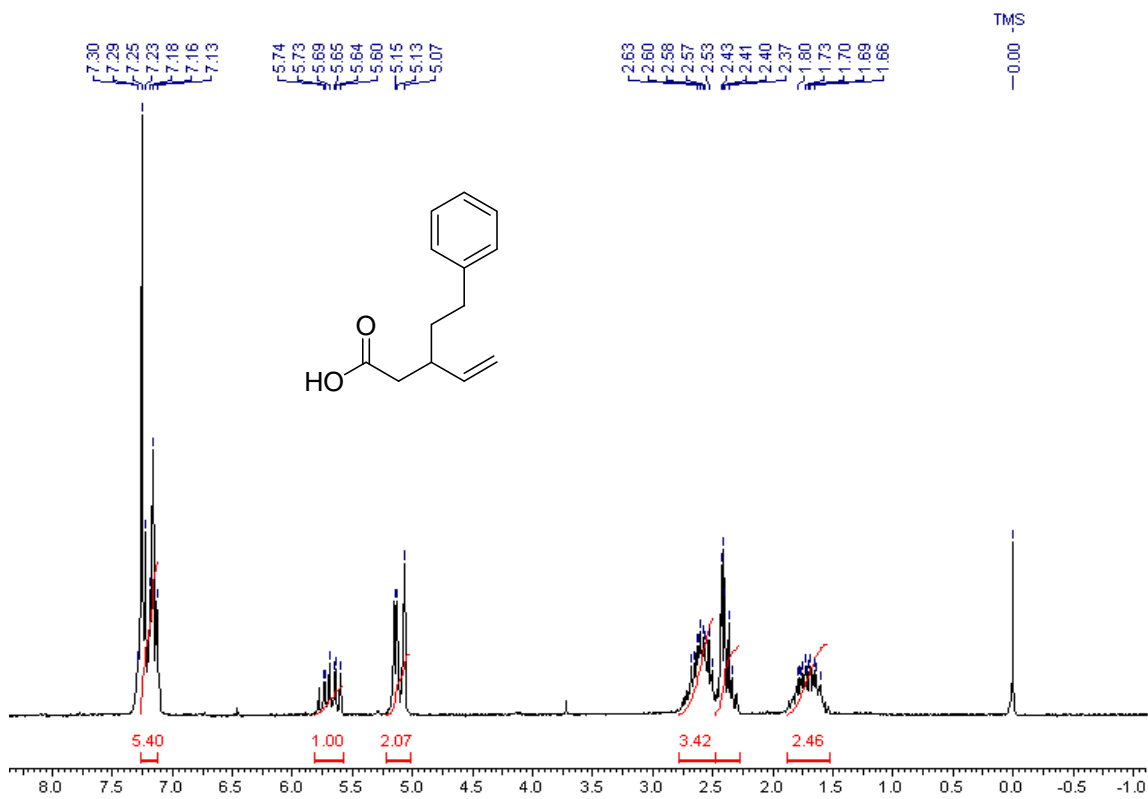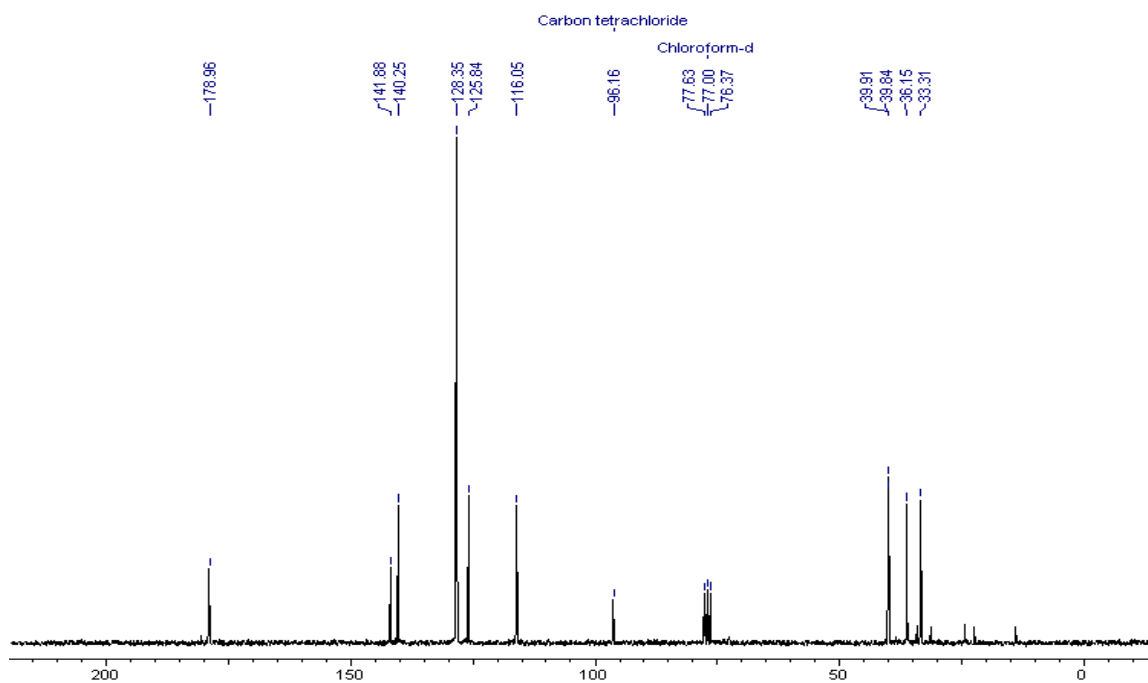

**3-phenethylpent-4-enoic acid (14h)**

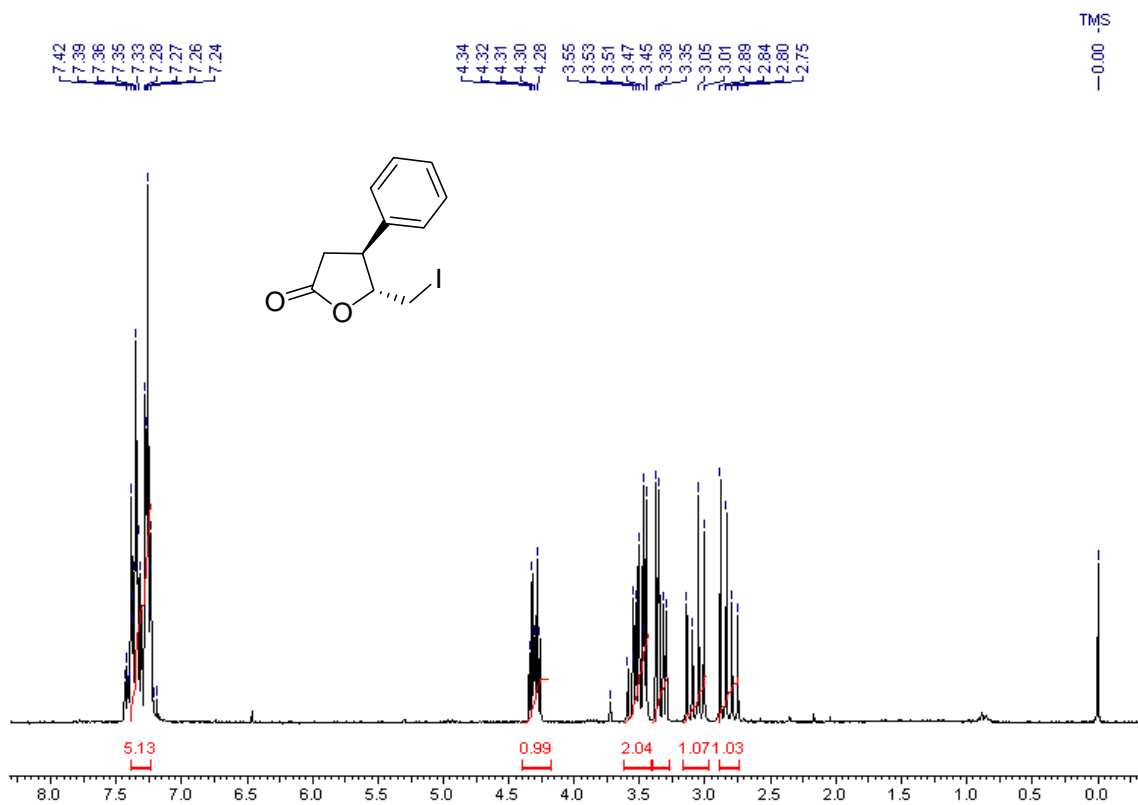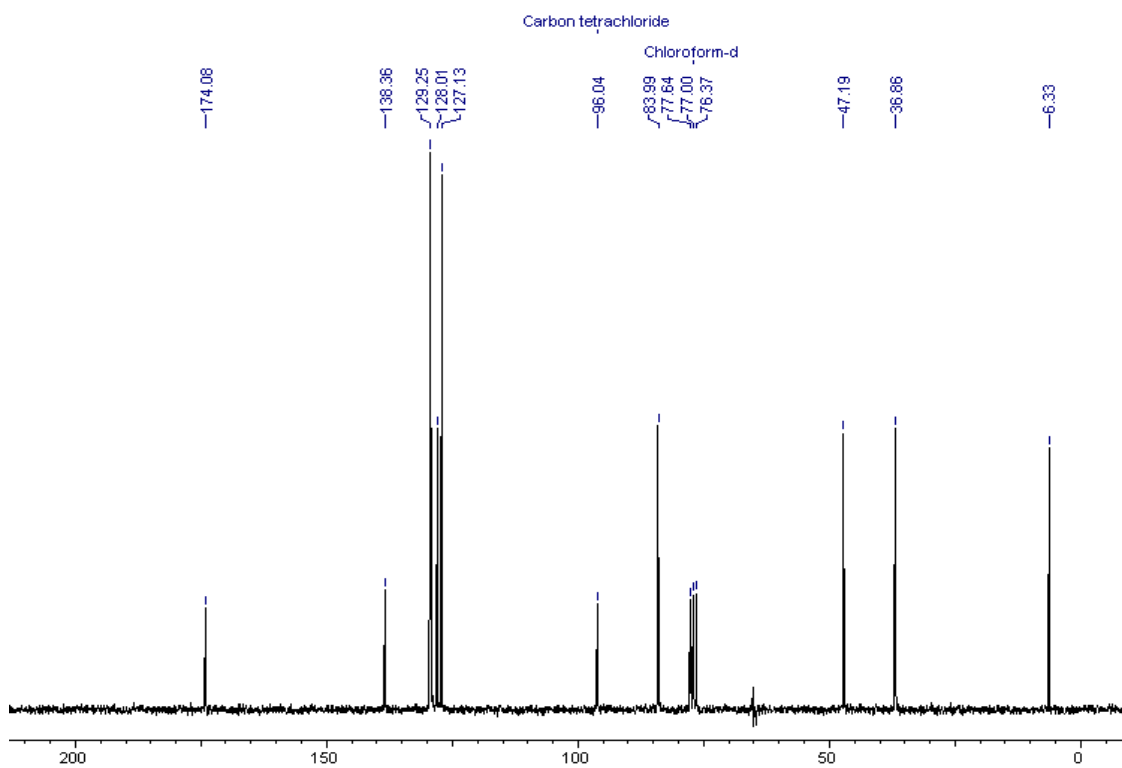

**5-(iodomethyl)-4-phenyldihydrofuran-2(3H)-one (15a)**

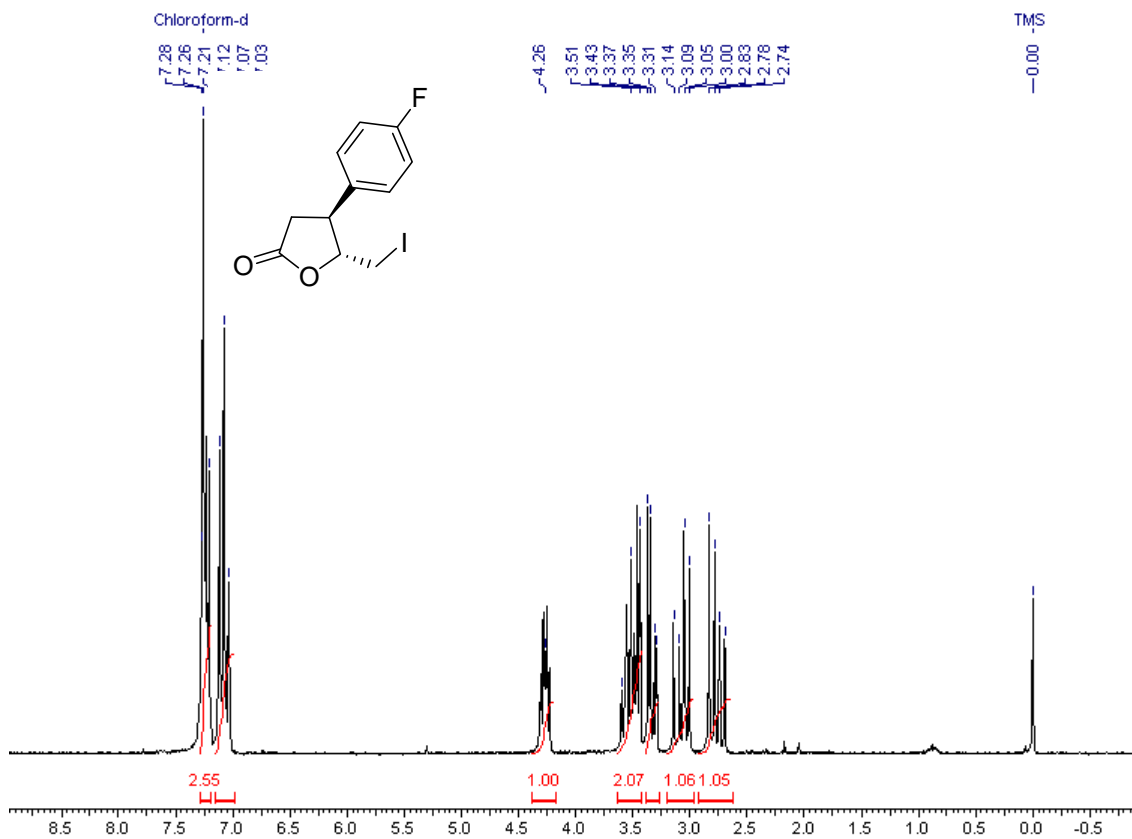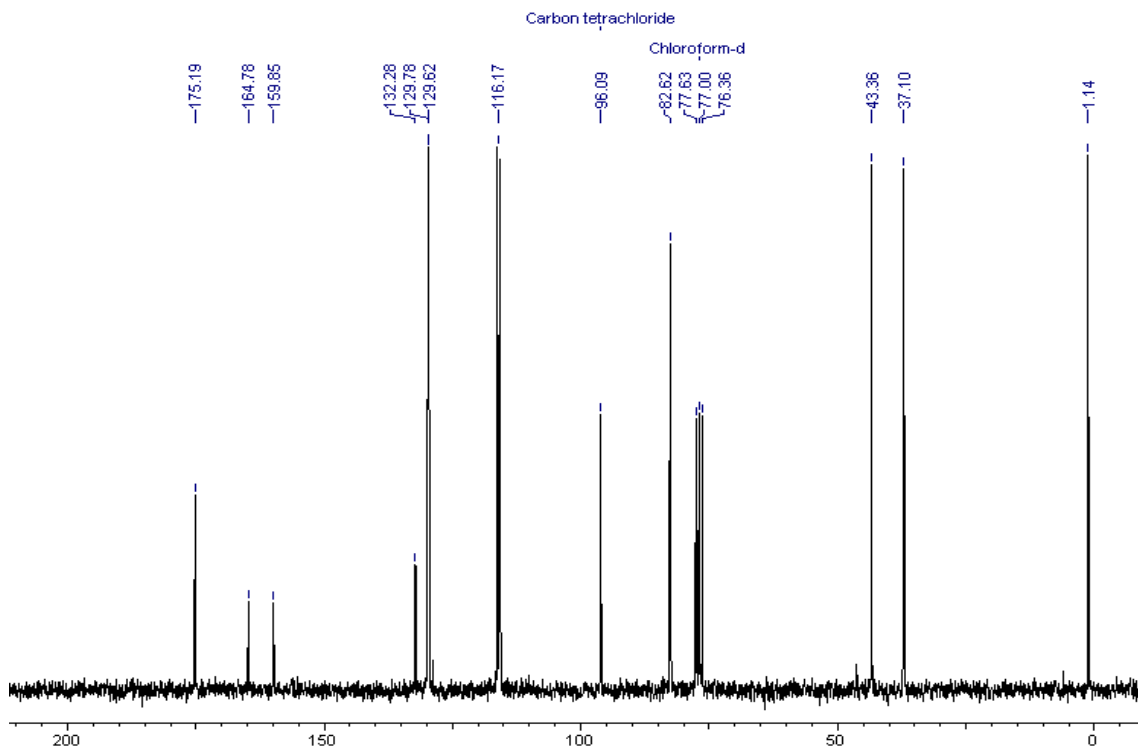

**4-(4-fluorophenyl)-5-(iodomethyl)dihydrofuran-2(3H)-one (15b)**

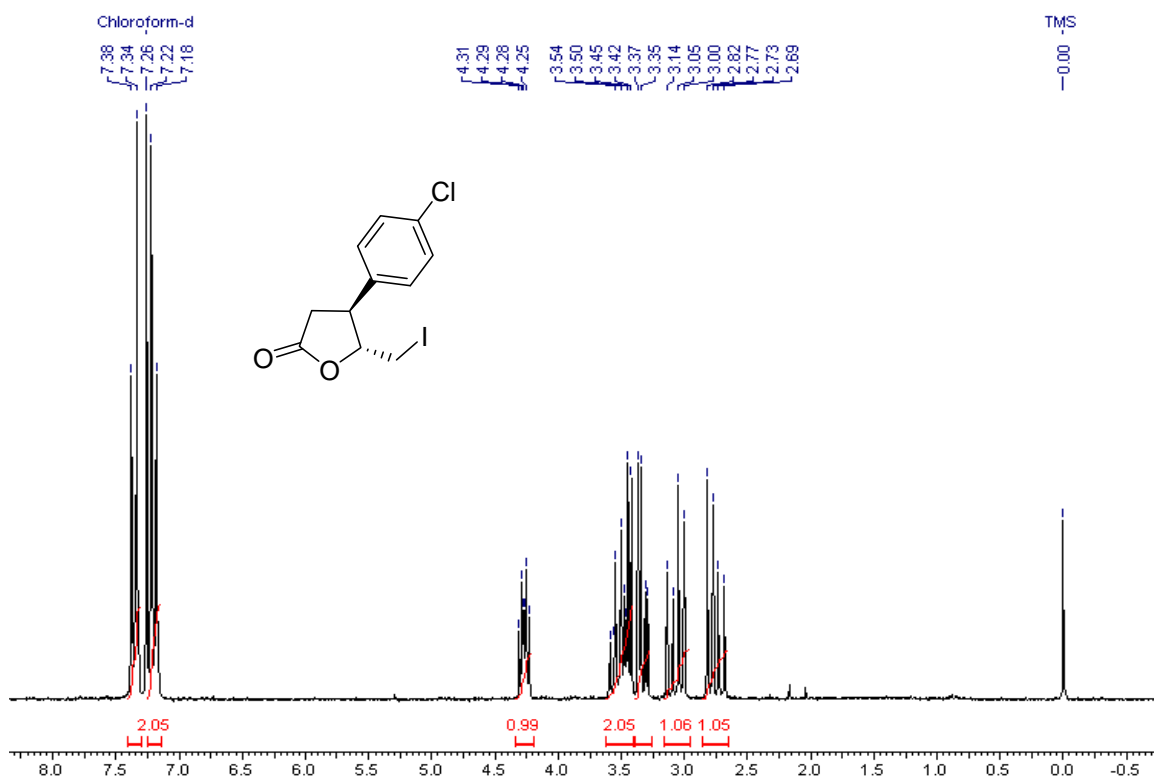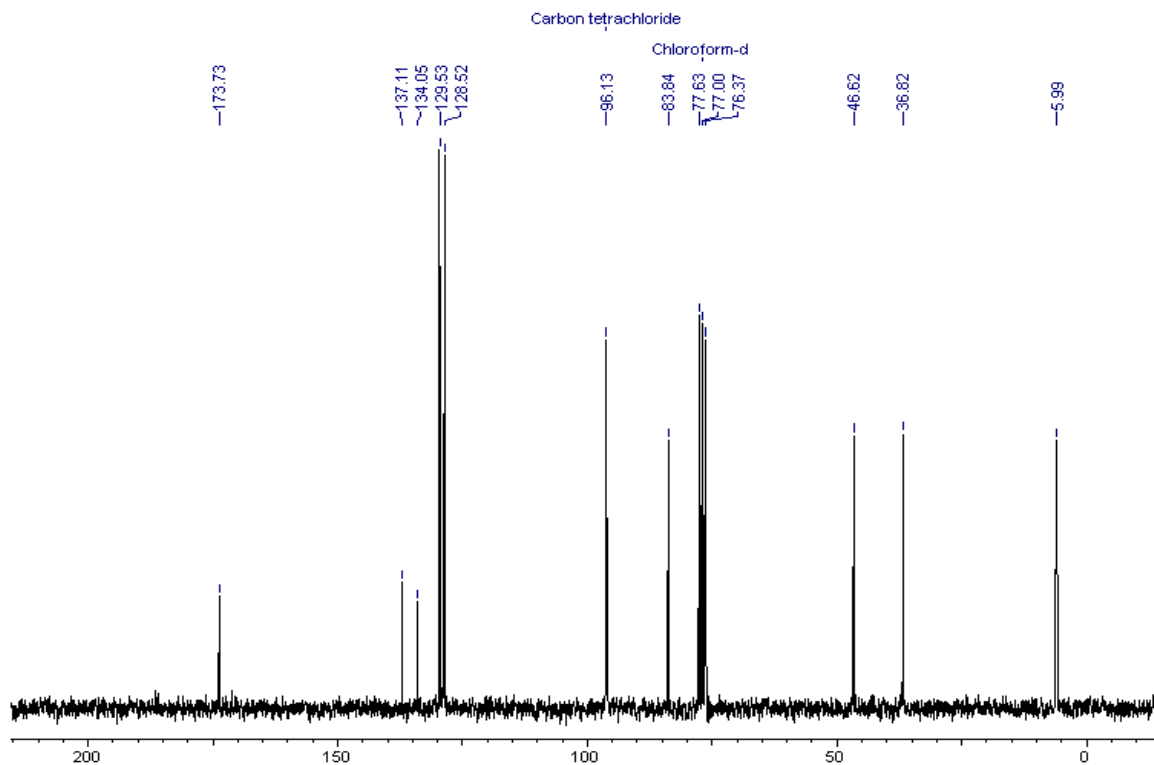

**4-(4-chlorophenyl)-5-(iodomethyl)dihydrofuran-2(3H)-one (15c)**



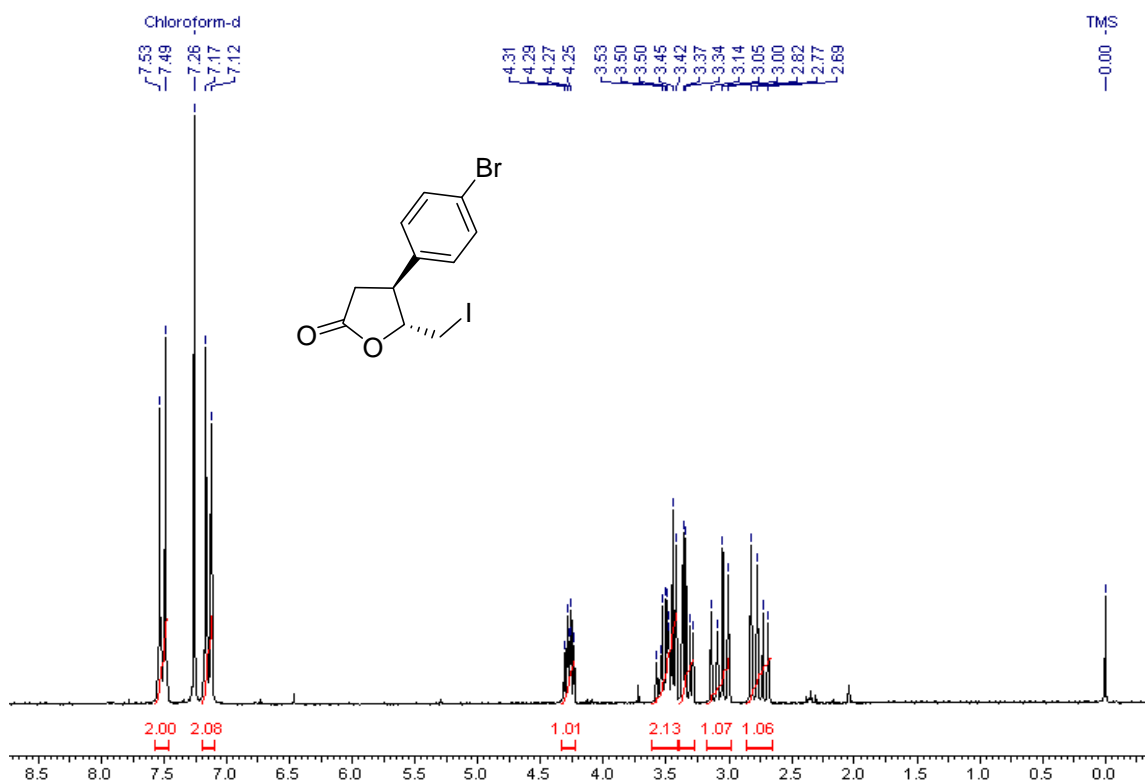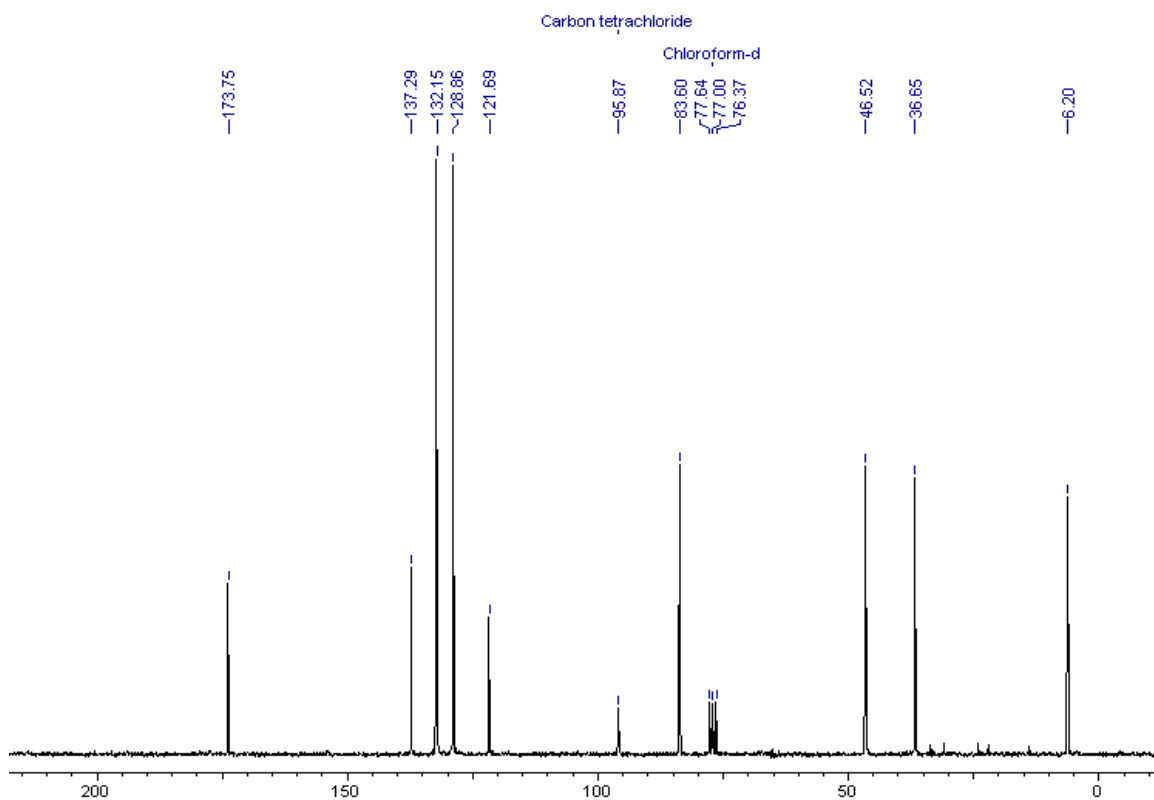

**4-(4-bromophenyl)-5-(iodomethyl)dihydrofuran-2(3H)-one (15d)**

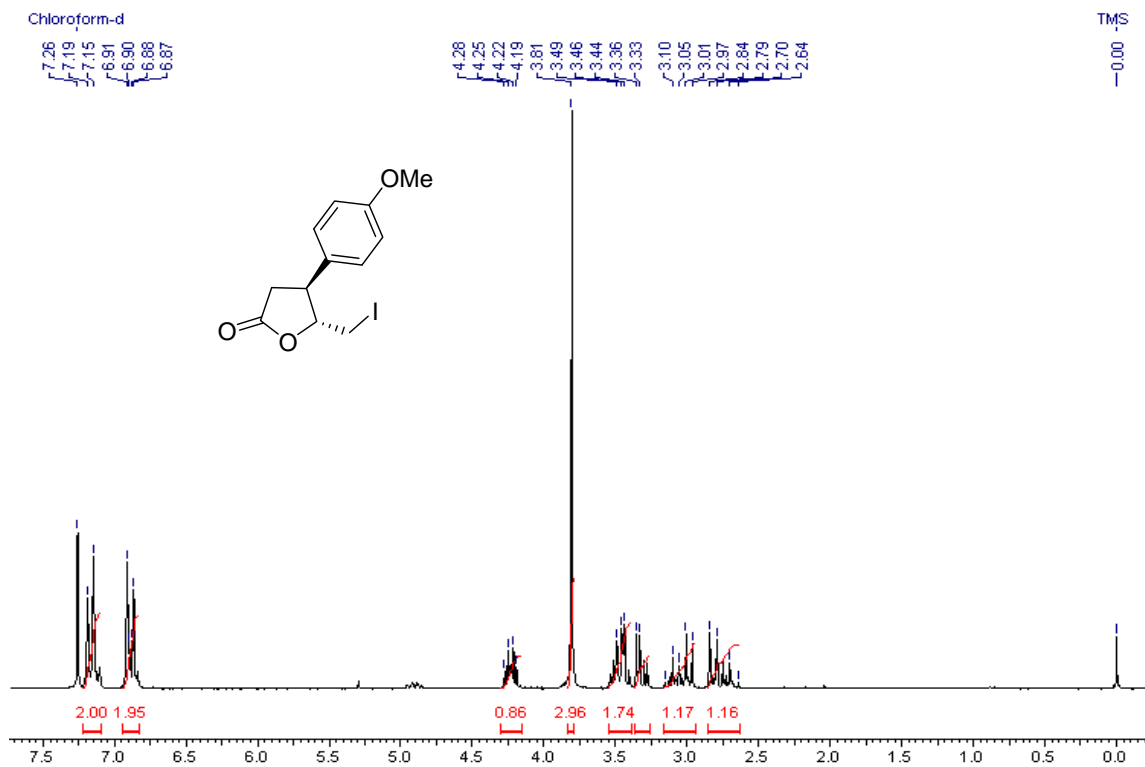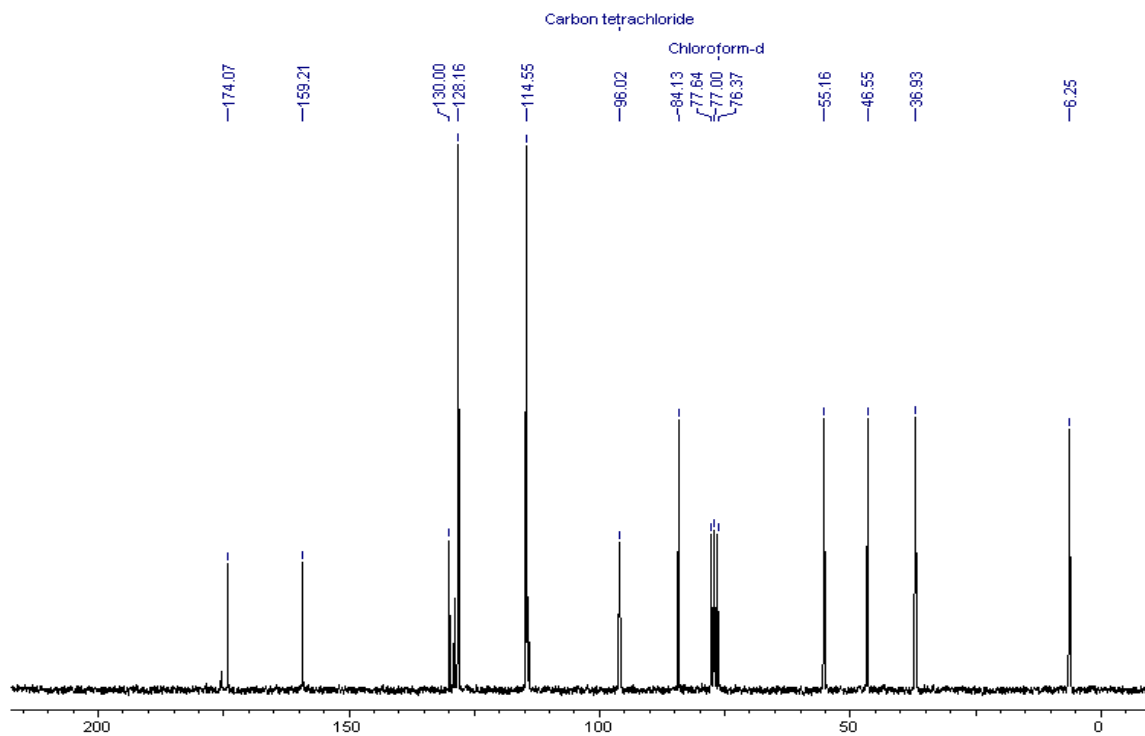

5-(iodomethyl)-4-(4-methoxyphenyl)dihydrofuran-2(3H)-one (15e)

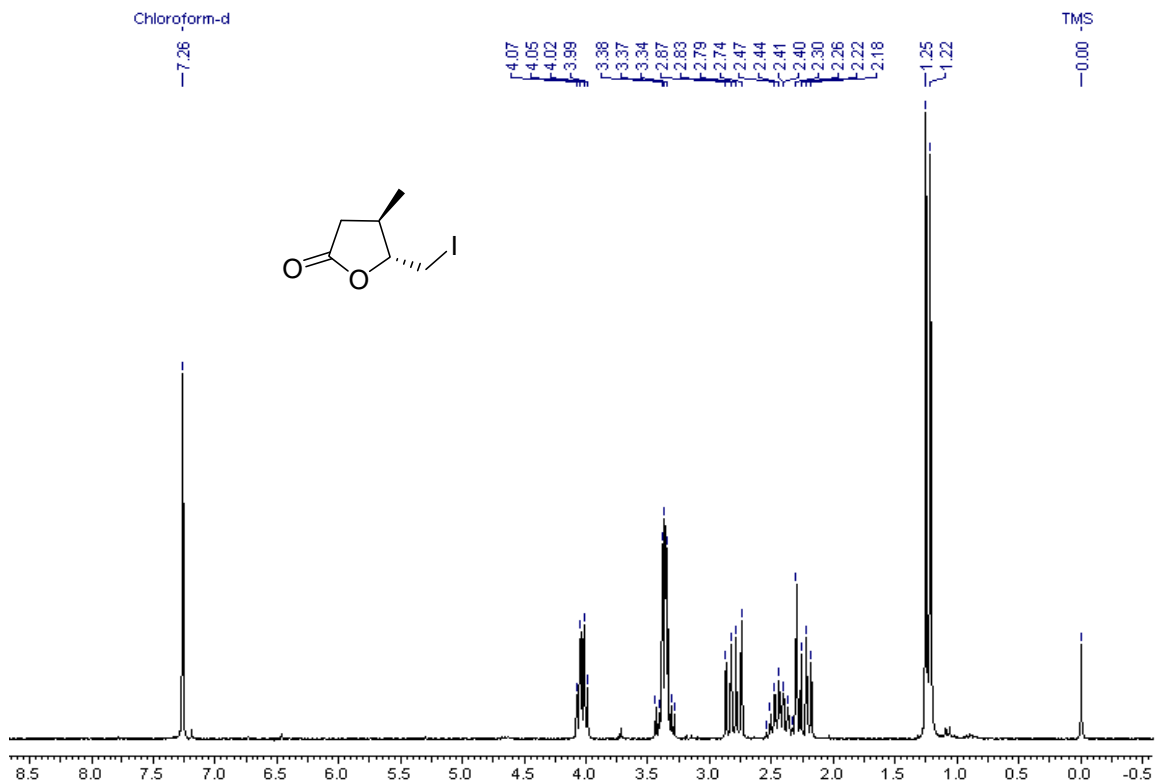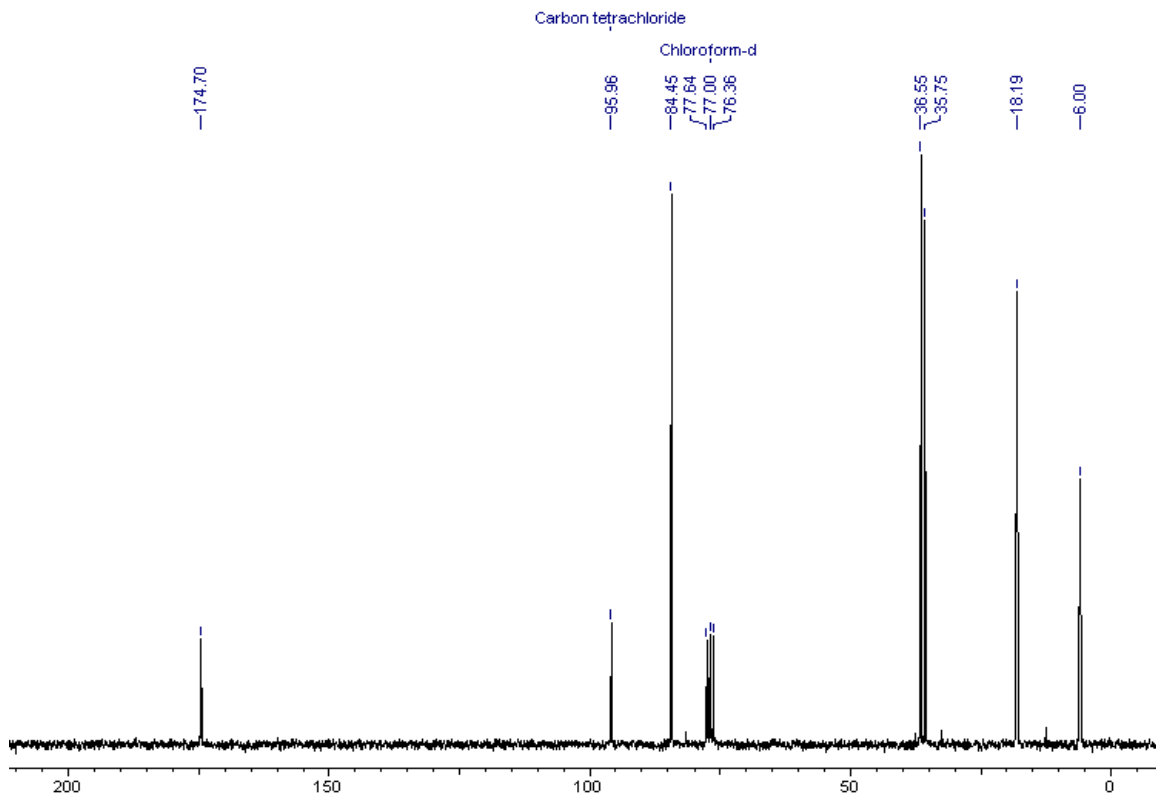

**5-(iodomethyl)-4-methyldihydrofuran-2(3H)-one (15f)**

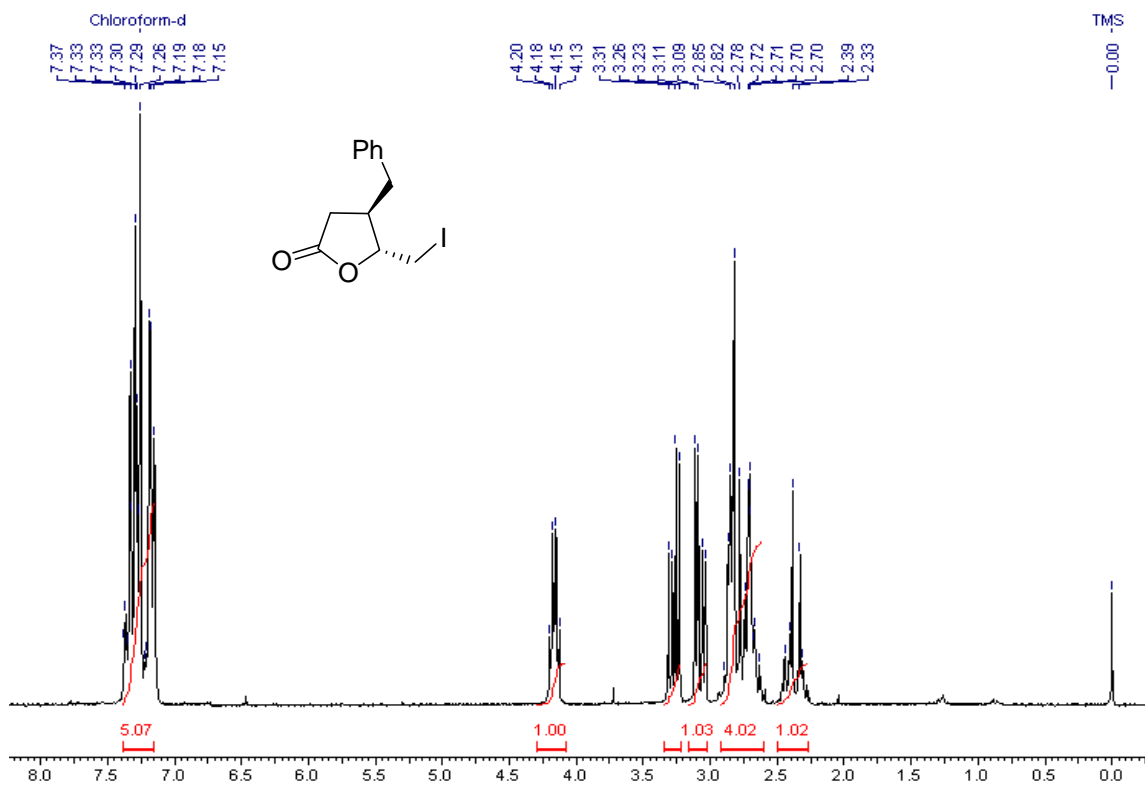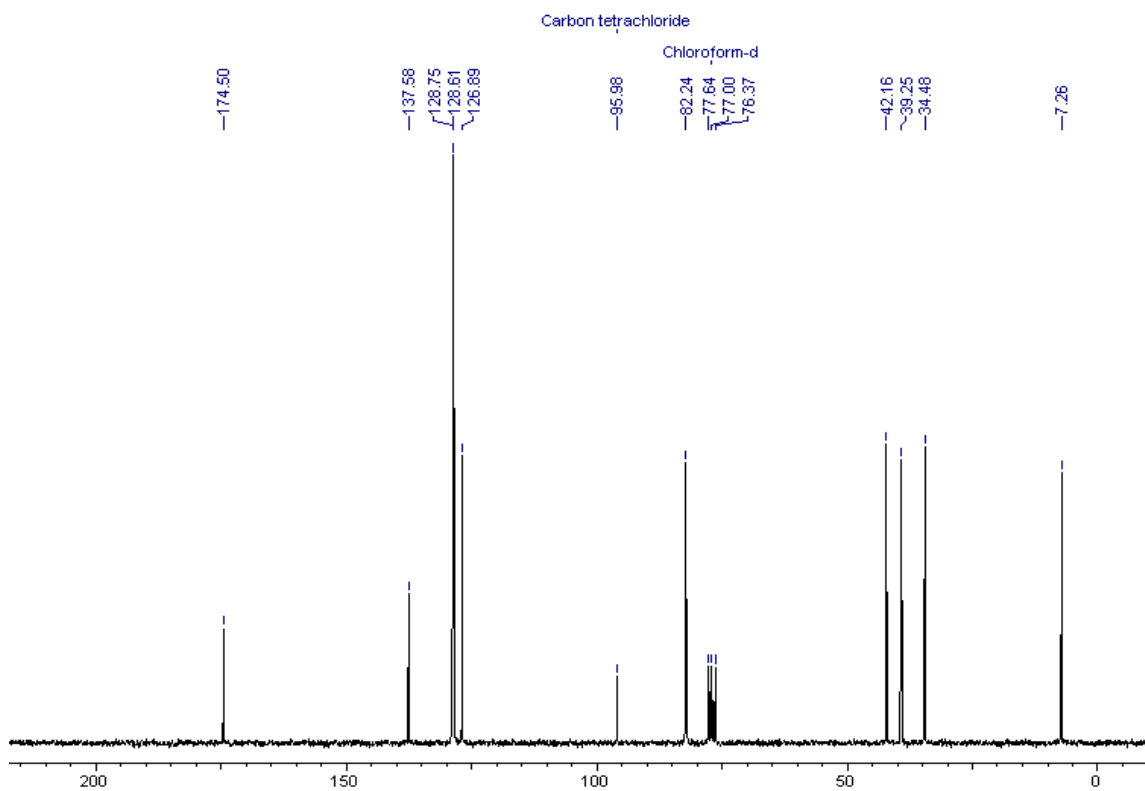

**4-benzyl-5-(iodomethyl)dihydrofuran-2(3H)-one (15g)**

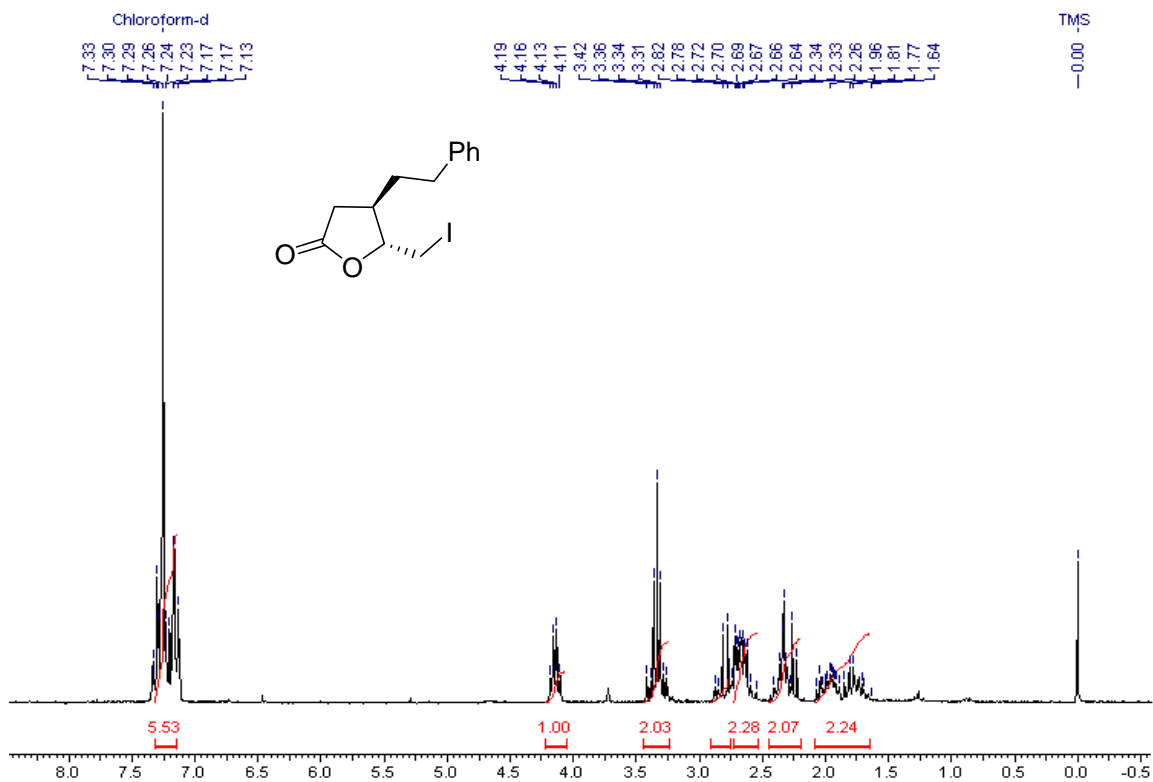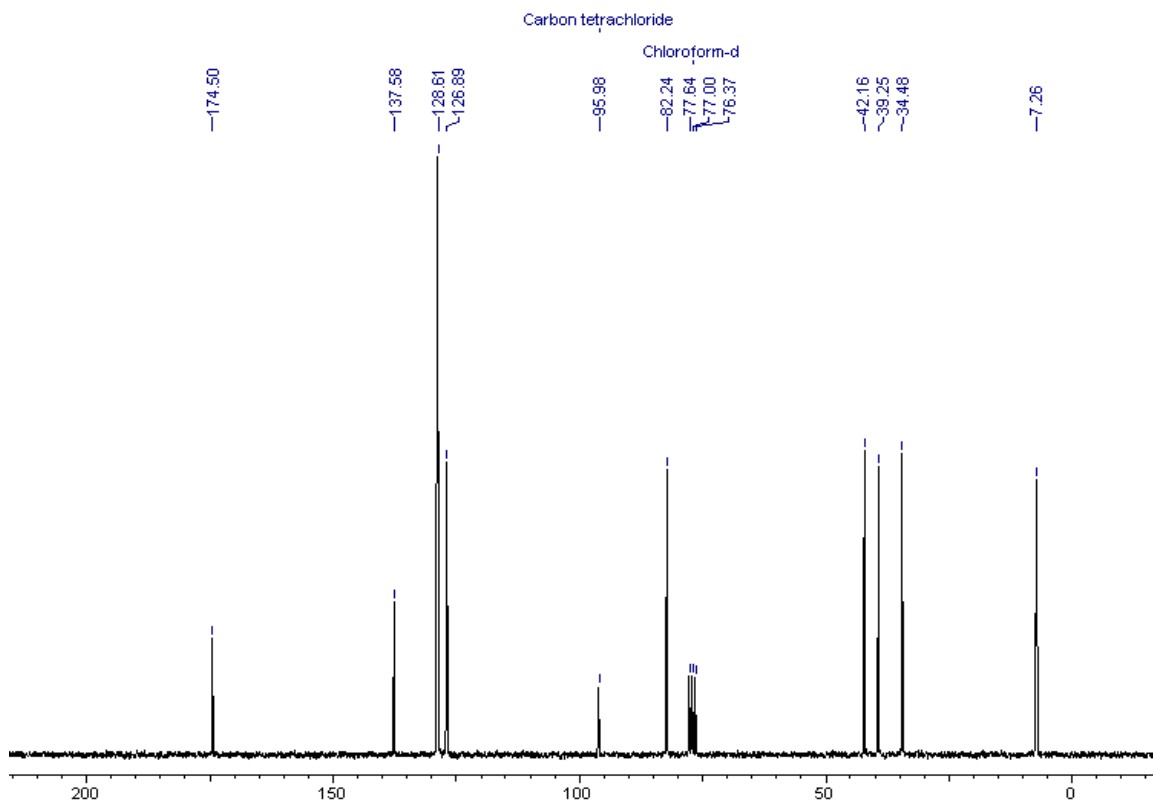

**5-(iodomethyl)-4-phenethyldihydrofuran-2(3H)-one (15h)**

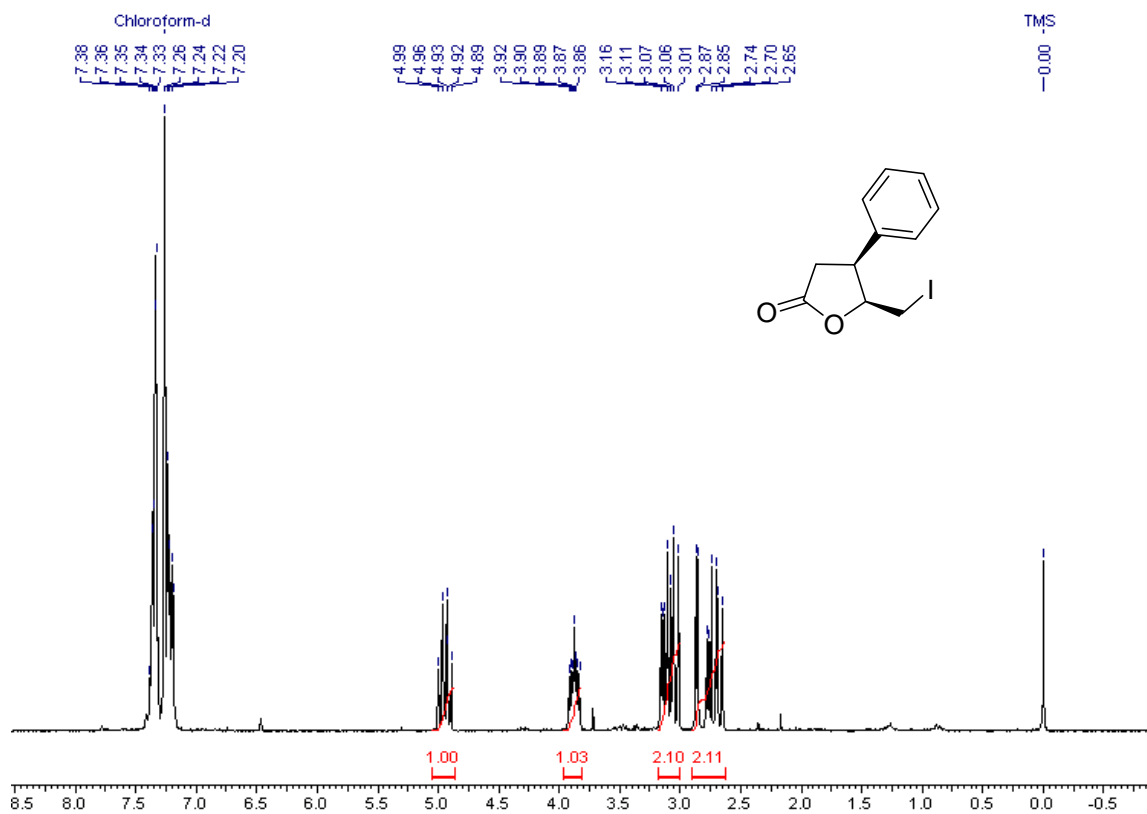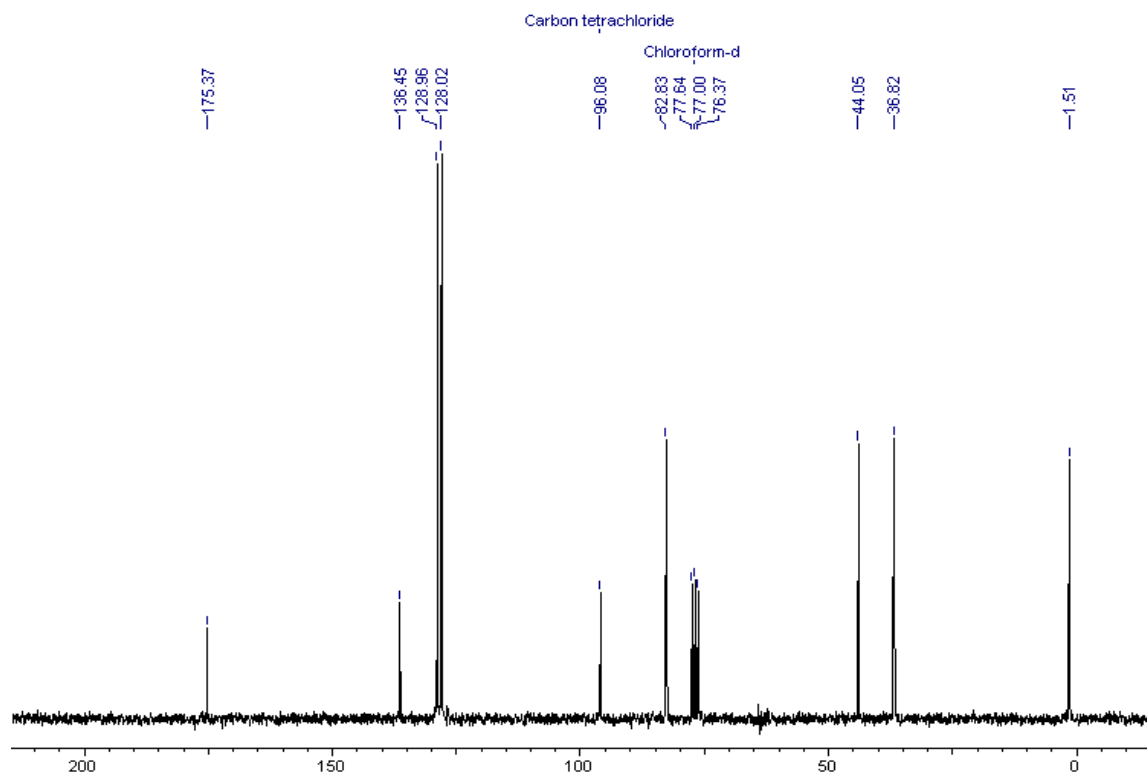

**5-(iodomethyl)-4-phenyldihydrofuran-2(3H)-one (16a)**

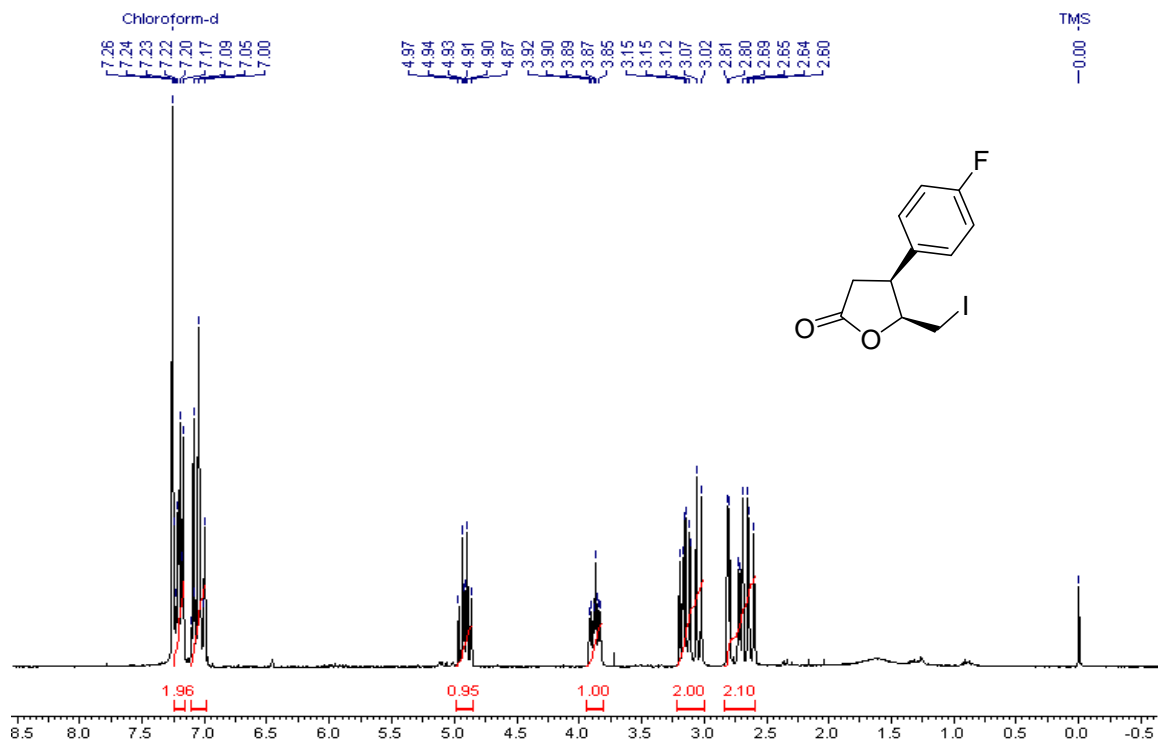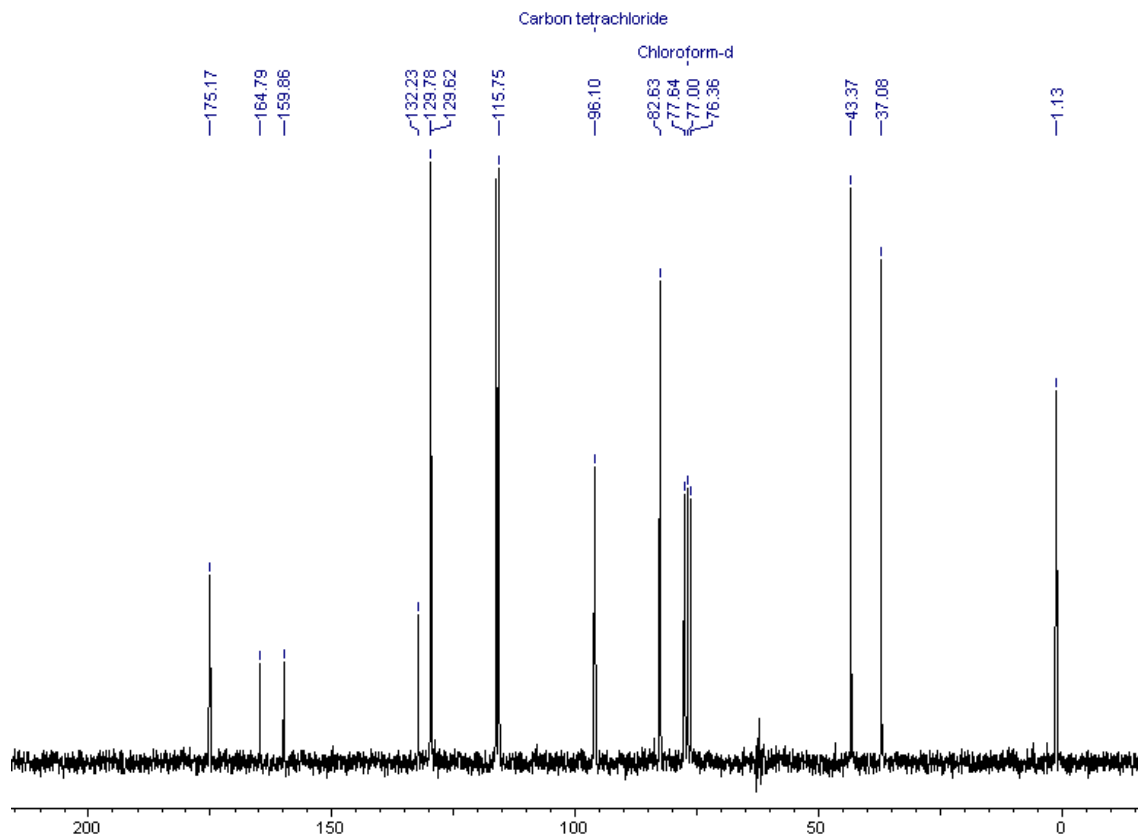

**4-(4-fluorophenyl)-5-(iodomethyl)dihydrofuran-2(3H)-one (16b)**

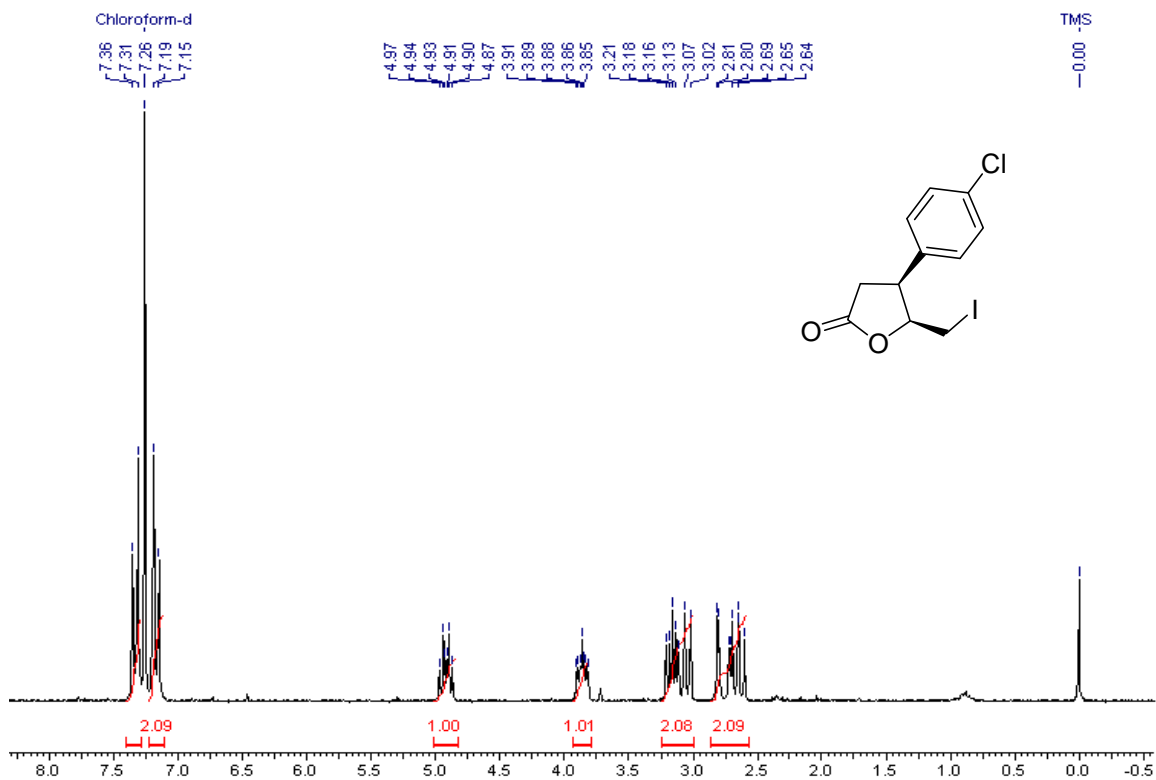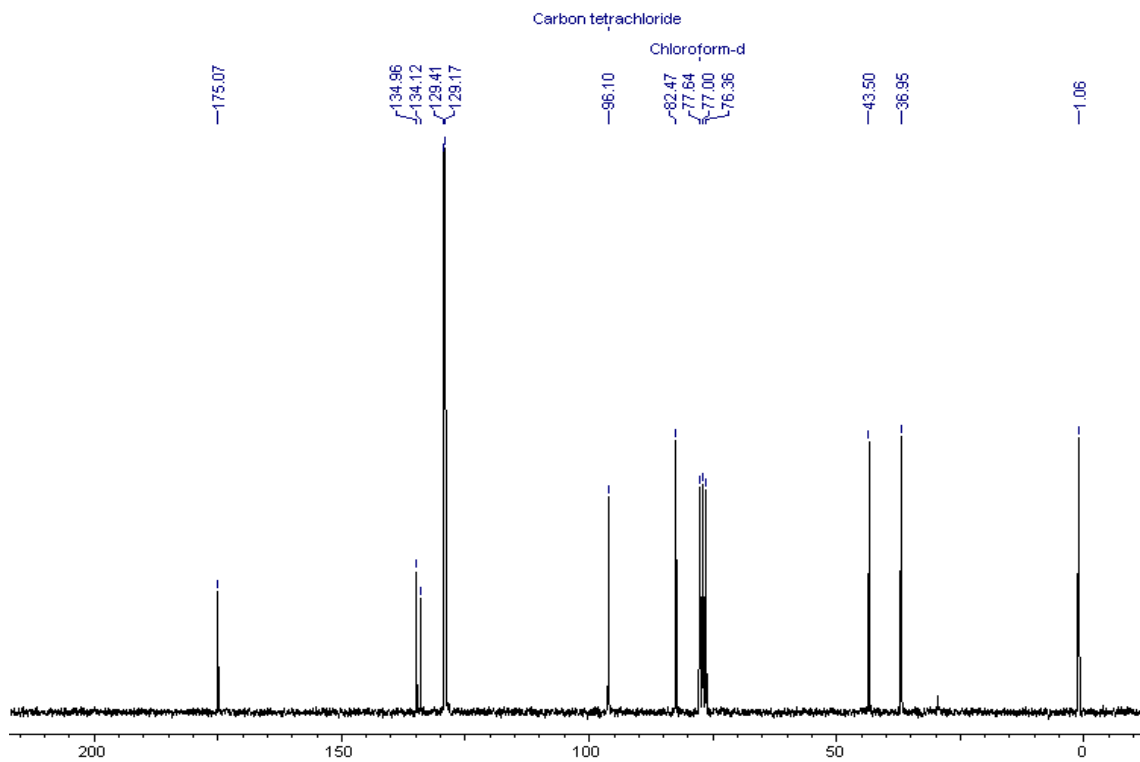

(4S,5S)-4-(4-chlorophenyl)-dihydro-5-(iodomethyl)furan-2(3H)-one (16c)



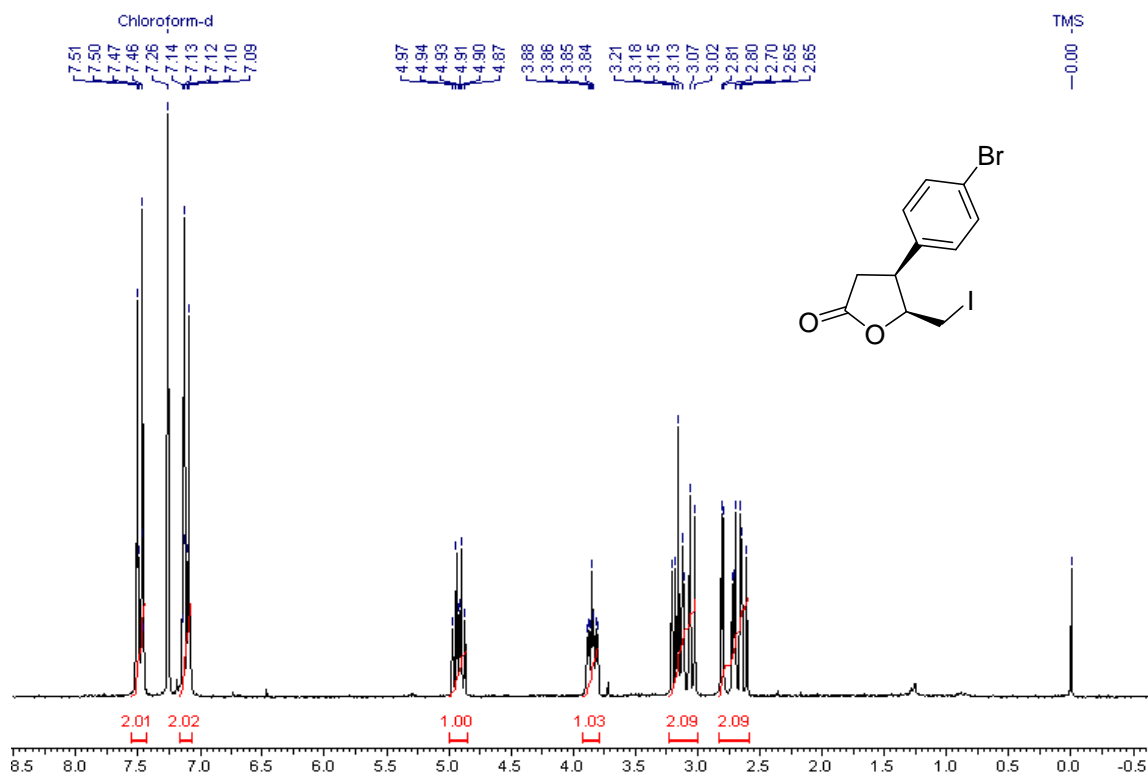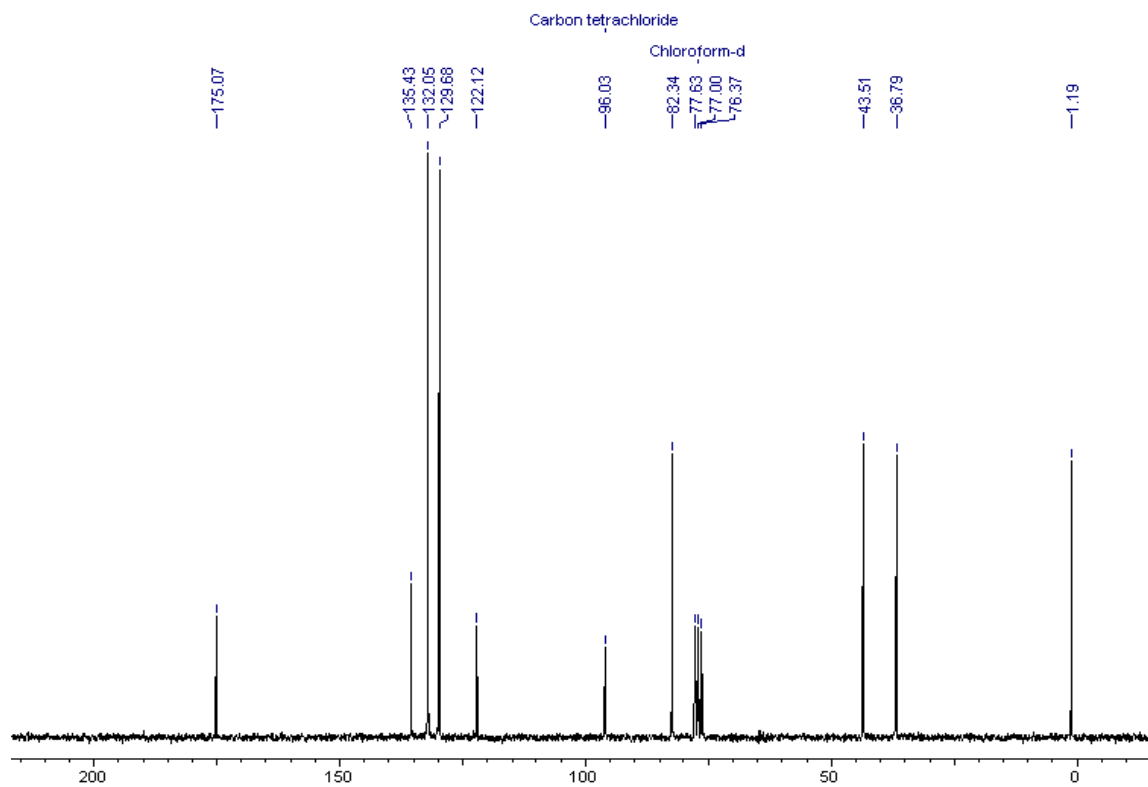

4-(4-bromophenyl)-5-(iodomethyl)dihydrofuran-2(3H)-one (16d)

## HPCL Chromatogram

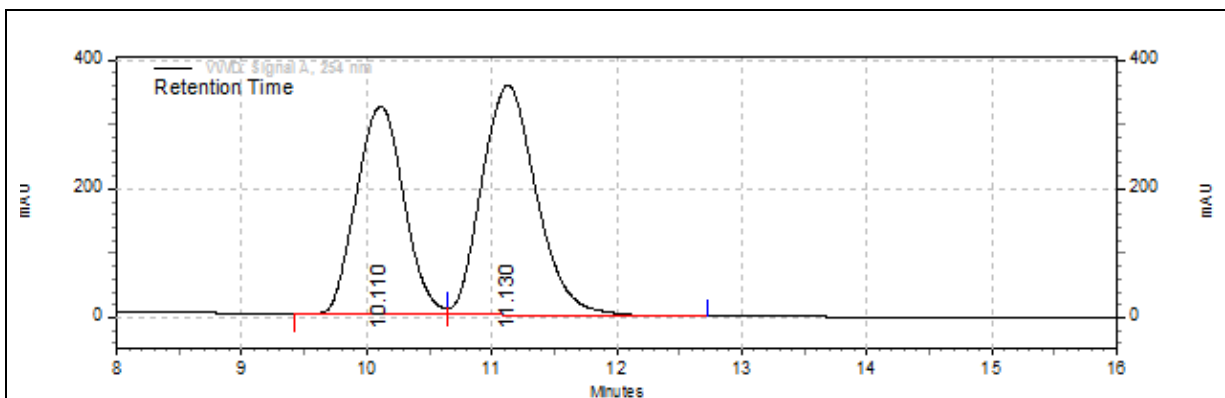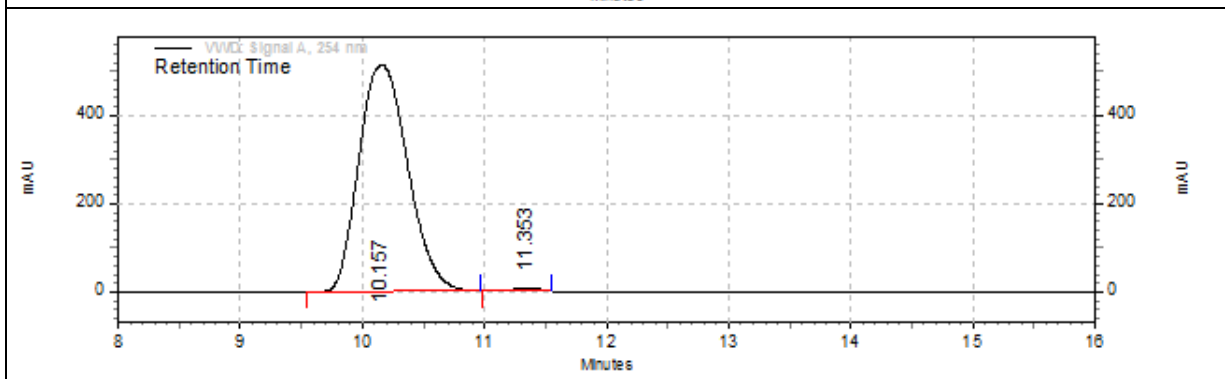

### VWD: Signal

A, 254 nm

### Results

| Retention Time | Area      | Area % | Height  | Height % |
|----------------|-----------|--------|---------|----------|
| 10.157         | 239861276 | 99.56  | 8617320 | 99.39    |
| 11.353         | 1070458   | 0.44   | 52774   | 0.61     |
| Totals         | 240931734 | 100.00 | 8670094 | 100.00   |

Column :Chiracel OD-H (4.6X250 nm)

Mobile Phase :IPA:n-Hexane(50:50)

Wavelength :254 nm

Flow rate :0.5ml/min

**(4*S*, 5*R*)-5-(hydroxymethyl)-4-phenyldihydrofuran-2(3*H*)-one (8a)**

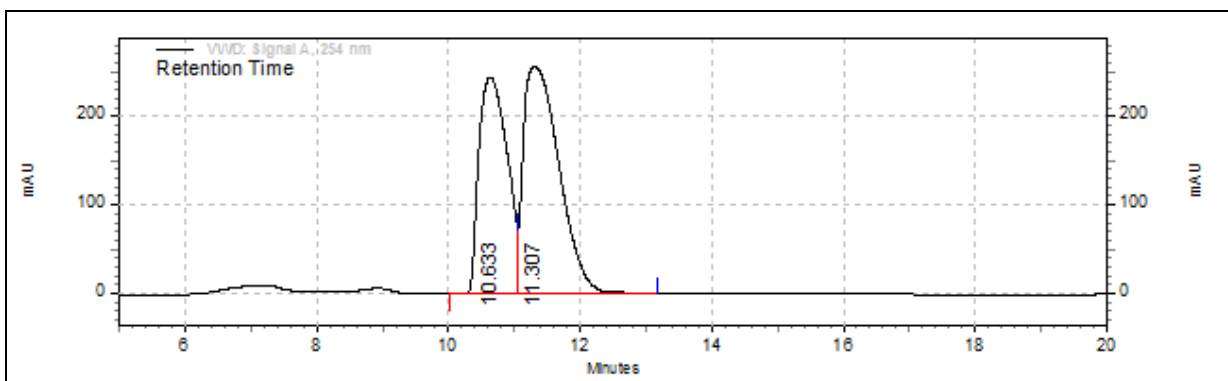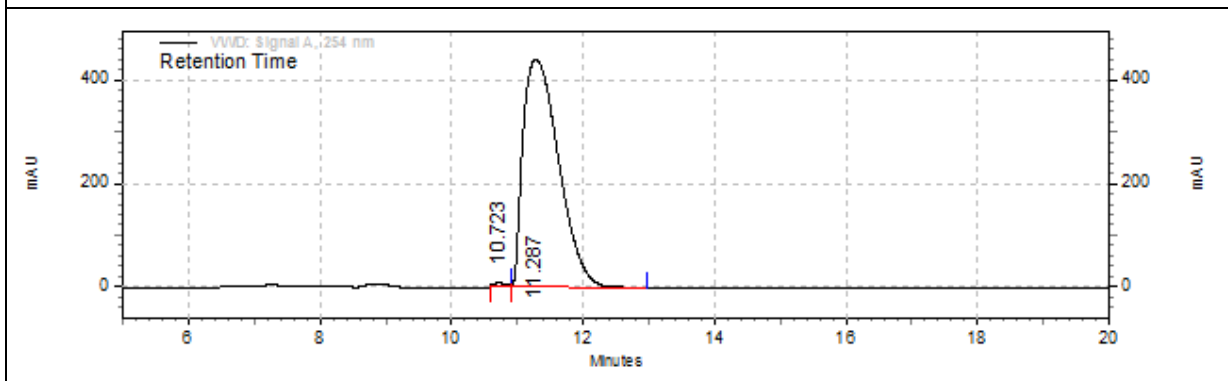

**VWD: Signal  
A, 254 nm**

**Results**

| Retention Time | Area      | Area % | Height  | Height % |
|----------------|-----------|--------|---------|----------|
| 10.723         | 1145220   | 0.41   | 84440   | 1.14     |
| 11.287         | 276138259 | 99.59  | 7342750 | 98.86    |
| Totals         | 277283479 | 100.00 | 7427190 | 100.00   |

Column :Chiracel OJ-H (4.6X250 nm)  
Mobile Phase :IPA:n-Hexane(50:50)  
Wavelength :254 nm  
Flow rate :0.5ml/min

**(4*S*, 5*R*)-4-(4-fluorophenyl)-5-(hydroxymethyl)dihydrofuran-2(3*H*)-one (8b)**

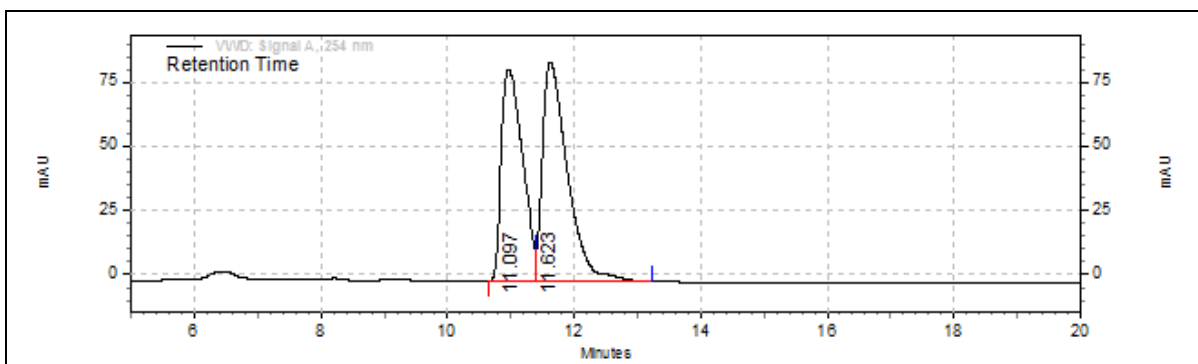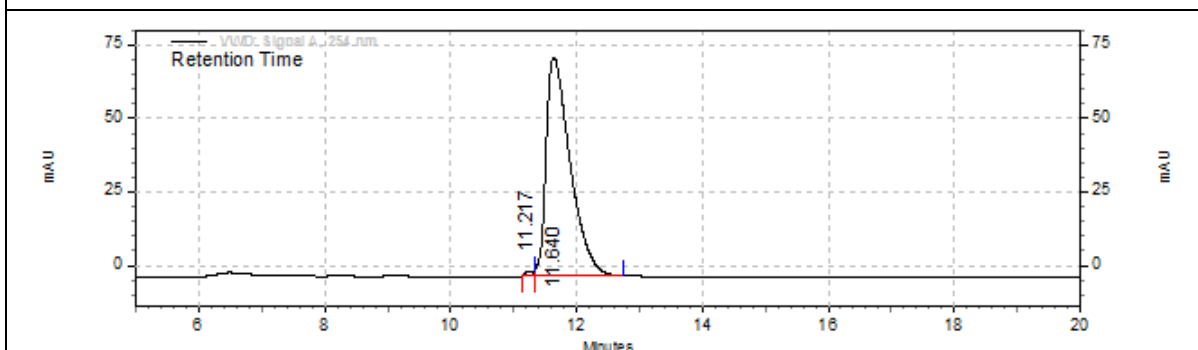

**VWD: Signal**

**A, 254 nm**

**Results**

| Retention Time | Area            | Area %        | Height         | Height %      |
|----------------|-----------------|---------------|----------------|---------------|
| 11.217         | 385194          | 1.15          | 39712          | 3.09          |
| 11.640         | 33195399        | 98.85         | 1245458        | 96.91         |
| <b>Totals</b>  | <b>33580593</b> | <b>100.00</b> | <b>1285170</b> | <b>100.00</b> |

Column :Chiracel OJ-H (4.6X250 nm)

Mobile Phase :IPA:n-Hexane(50:50)

Wavelength :254 nm

Flow rate :0.5ml/min

**(4*S*, 5*R*)-4-(4-chlorophenyl)-5-(hydroxymethyl)dihydrofuran-2(3*H*)-one (8c)**

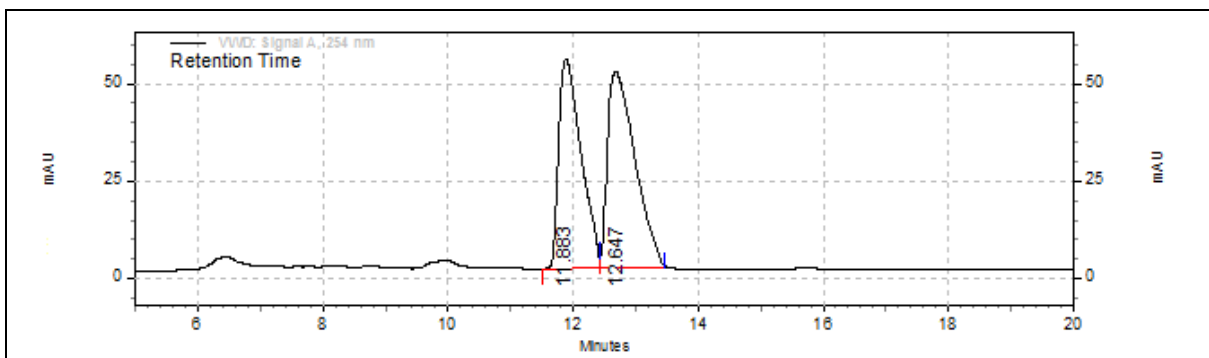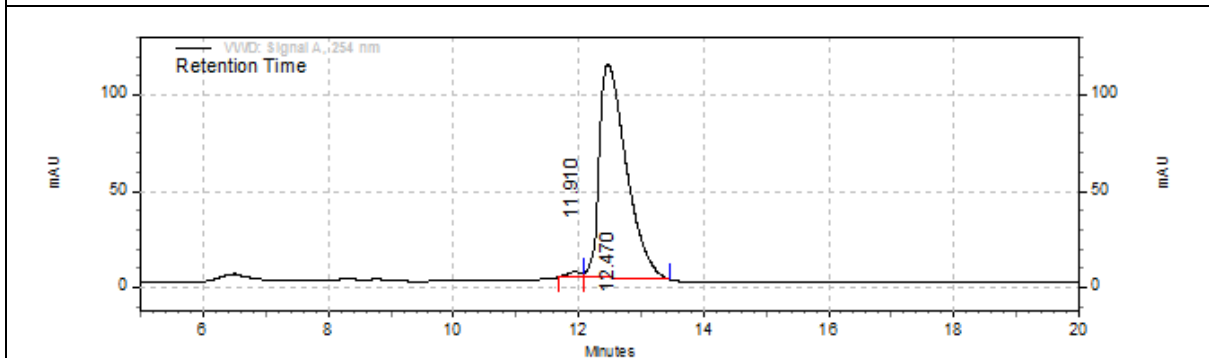

**VWD: Signal**

**A, 254 nm**

**Results**

| Retention Time | Area            | Area %        | Height         | Height %      |
|----------------|-----------------|---------------|----------------|---------------|
| 11.910         | 1174002         | 1.89          | 63064          | 2.84          |
| 12.470         | 60942491        | 98.11         | 2157502        | 97.16         |
| <b>Totals</b>  | <b>62116493</b> | <b>100.00</b> | <b>2220566</b> | <b>100.00</b> |

Column :Chiracel OJ-H (4.6X250 nm)

Mobile Phase :IPA:n-Hexane(50:50)

Wavelength :254 nm

Flow rate :0.5ml/min

**(4*S*, 5*R*)-4-(4-bromophenyl)-5-(hydroxymethyl)dihydrofuran-2(3*H*)-one (8d)**

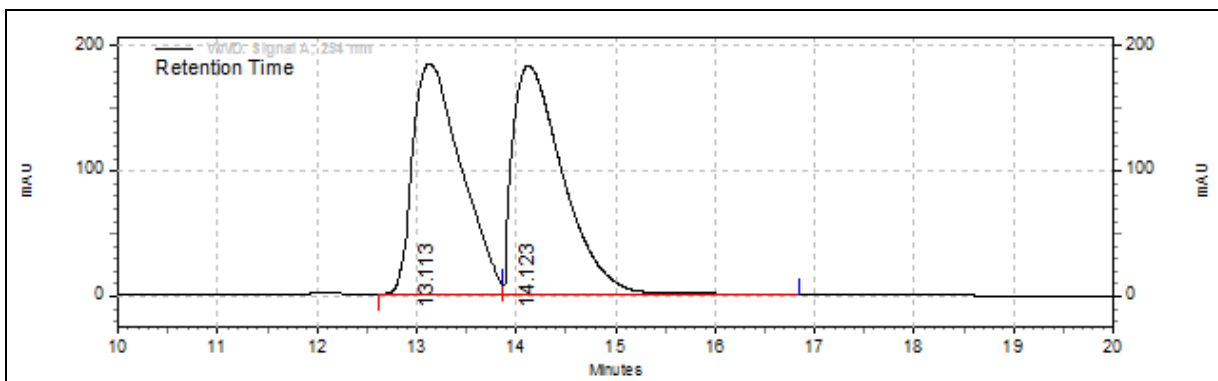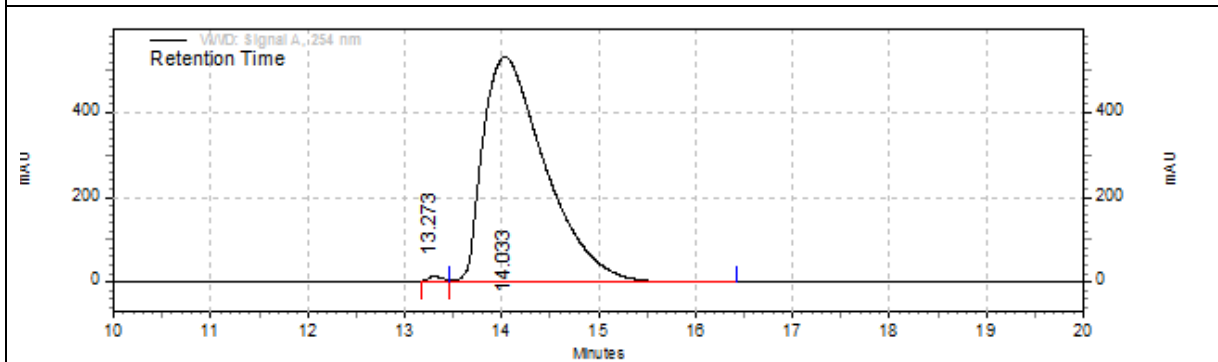

**VWD: Signal  
A, 254 nm**

**Results**

| Retention Time | Area             | Area %        | Height         | Height %      |
|----------------|------------------|---------------|----------------|---------------|
| 13.273         | 6404390          | 1.58          | 342368         | 3.70          |
| 14.033         | 398481392        | 98.42         | 8914216        | 96.30         |
| <b>Totals</b>  | <b>404885782</b> | <b>100.00</b> | <b>9256584</b> | <b>100.00</b> |

Column :Chiracel OJ-H (4.6X250 nm)  
 Mobile Phase :IPA:n-Hexane(50:50)  
 Wavelength :254 nm  
 Flow rate :0.5ml/min

**(4*S*, 5*R*)-5-(hydroxymethyl)-4-(4-methoxyphenyl)dihydro- furan-2(3*H*)-one (8e)**

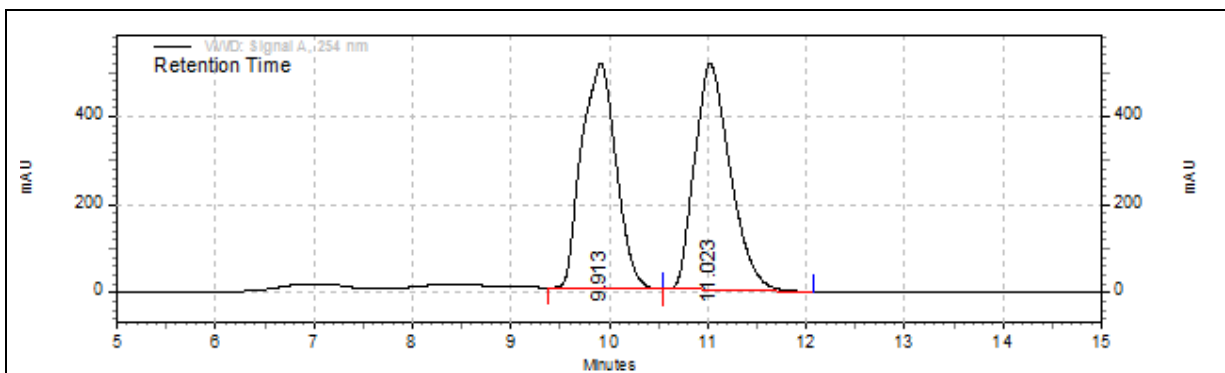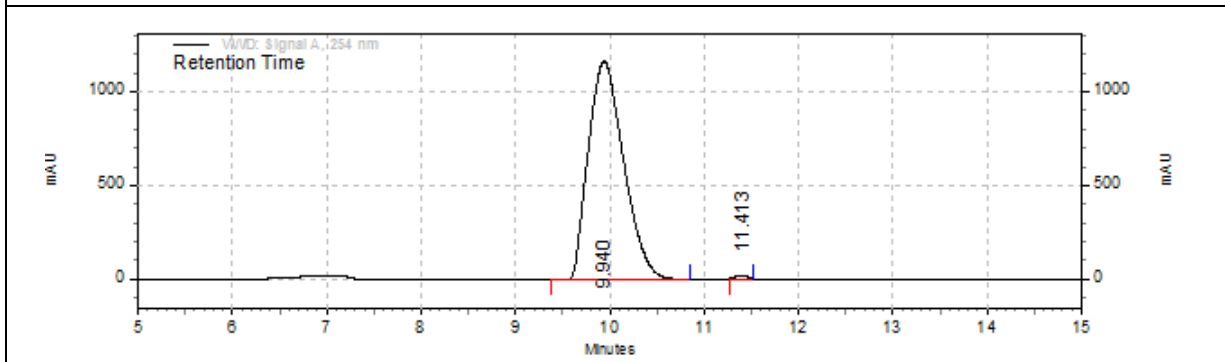

**VWD: Signal  
A, 254 nm  
Results**

| Retention Time | Area      | Area % | Height   | Height % |
|----------------|-----------|--------|----------|----------|
| 9.940          | 514230213 | 99.44  | 19588723 | 97.40    |
| 11.413         | 2897113   | 0.56   | 522812   | 2.60     |
| Totals         | 517127326 | 100.00 | 20111535 | 100.00   |

Column :Chiracel OD-H (4.6X250 nm)

Mobile Phase :IPA:n-Hexane(50:50)

Wavelength :254 nm

Flow rate :0.5ml/min

**(4R, 5R)-4-benzyl-5-(hydroxymethyl)dihydrofuran-2(3H)-one (8g)**

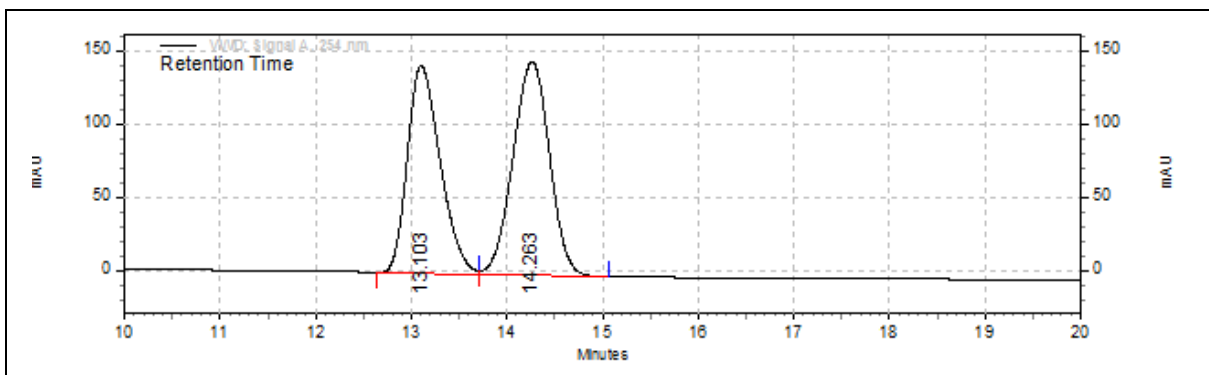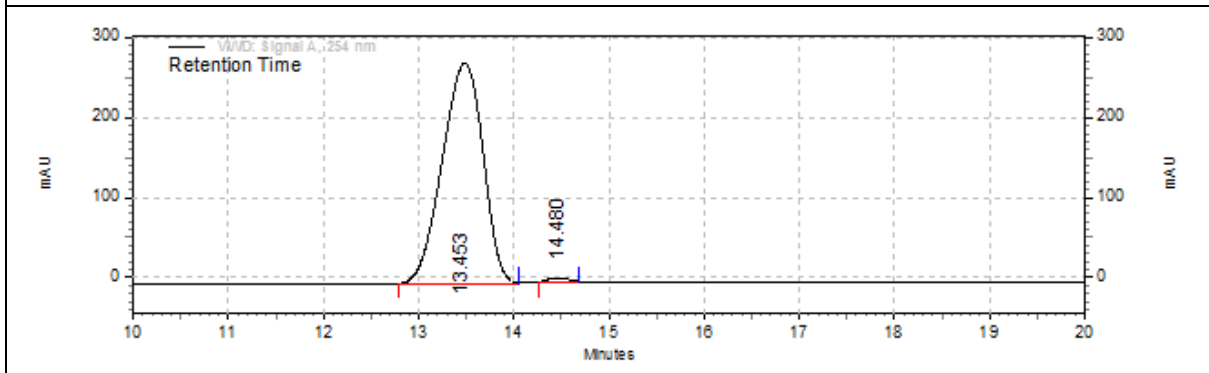

**VWD: Signal  
 A, 254 nm**

**Results**

| Retention Time | Area             | Area %        | Height         | Height %      |
|----------------|------------------|---------------|----------------|---------------|
| 13.453         | 141439488        | 98.10         | 4730300        | 97.33         |
| 14.480         | 2739399          | 1.90          | 129764         | 2.67          |
| <b>Totals</b>  | <b>144178887</b> | <b>100.00</b> | <b>4860064</b> | <b>100.00</b> |

Column :Chiracel OD-H (4.6X250 nm)  
 Mobile Phase :IPA:n-Hexane(50:50)  
 Wavelength :254 nm  
 Flow rate :0.5ml/min

**(4*R*, 5*R*)-5-(hydroxymethyl)-4-phenethyldihydrofuran-2(3*H*)-one (8h)**



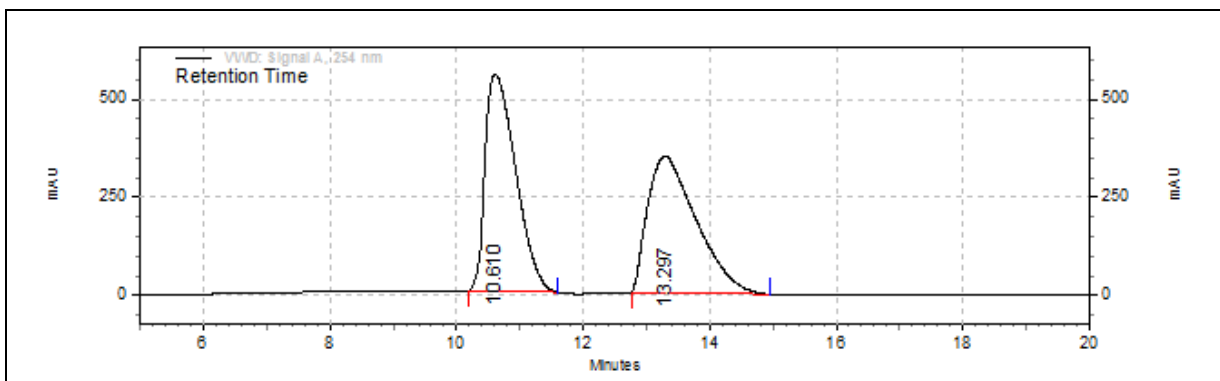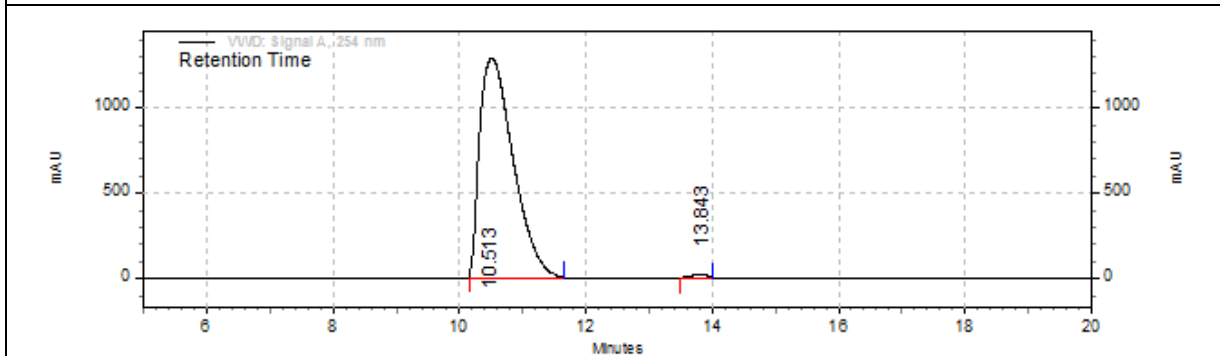

**VWD: Signal  
 A, 254 nm  
 Results**

| Retention Time | Area             | Area %        | Height          | Height %      |
|----------------|------------------|---------------|-----------------|---------------|
| 10.513         | 770861957        | 98.87         | 21199435        | 97.24         |
| 13.843         | 8810296          | 1.13          | 601712          | 2.76          |
| <b>Totals</b>  | <b>779672253</b> | <b>100.00</b> | <b>21801147</b> | <b>100.00</b> |

Column :Chiracel OJ-H (4.6X250 nm)  
 Mobile Phase :IPA:n-Hexane(50:50)  
 Wavelength :254 nm  
 Flow rate :0.5ml/min

**(4*S*, 5*S*)-5-(hydroxymethyl)-4-phenyldihydrofuran-2(3*H*)-one (11a)**

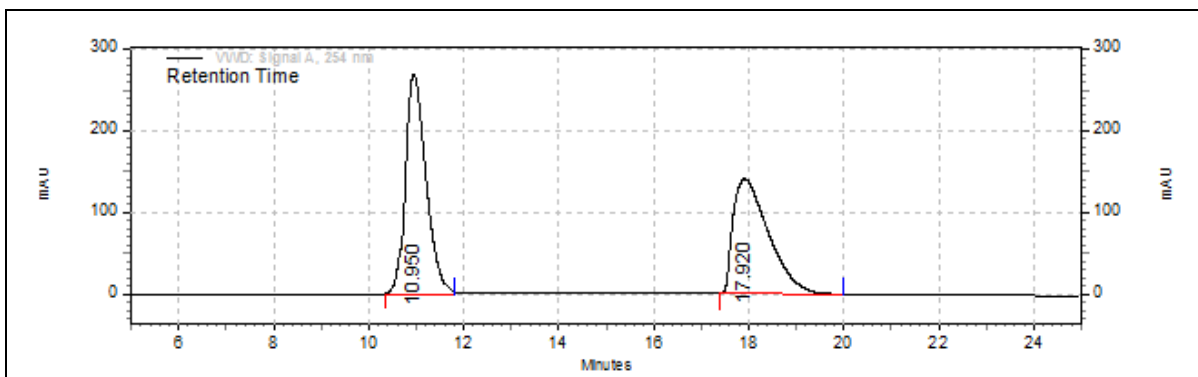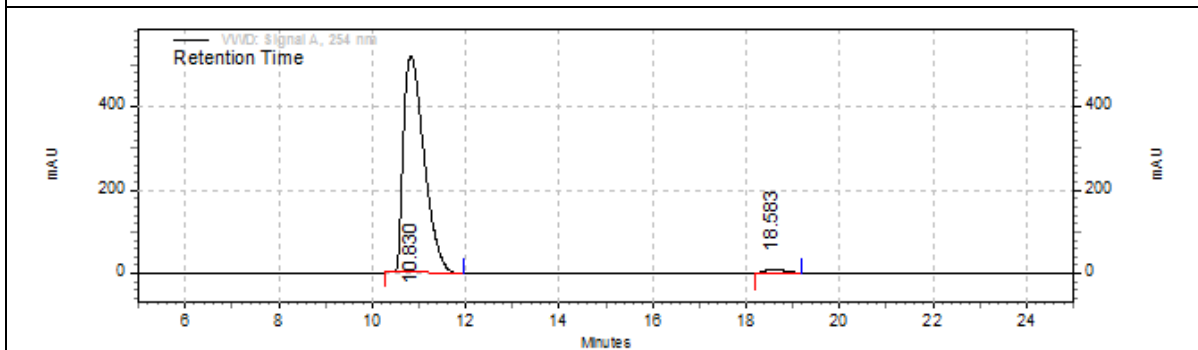

**VWD: Signal  
A, 254 nm  
Results**

| Retention Time | Area      | Area % | Height  | Height % |
|----------------|-----------|--------|---------|----------|
| 10.830         | 268706835 | 99.18  | 8661347 | 97.96    |
| 18.583         | 2221613   | 0.82   | 180255  | 2.04     |
| Totals         | 270928448 | 100.00 | 8841602 | 100.00   |

Column :Chiracel OJ-H (4.6X250 nm)  
Mobile Phase :IPA:n-Hexane(50:50)  
Wavelength :254 nm  
Flow rate :0.5ml/min

**(4*S*, 5*S*)-4-(4-fluorophenyl)-5-(hydroxymethyl)dihydrofuran-2(3*H*)-one (11b)**

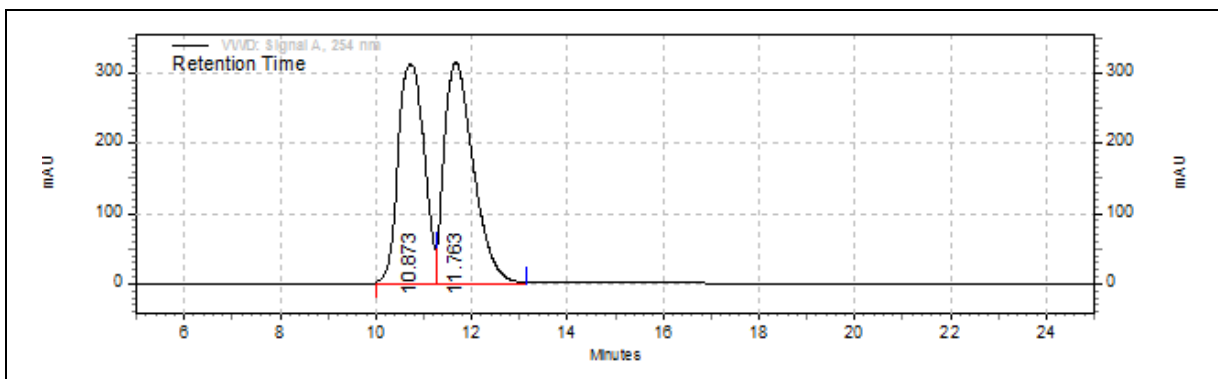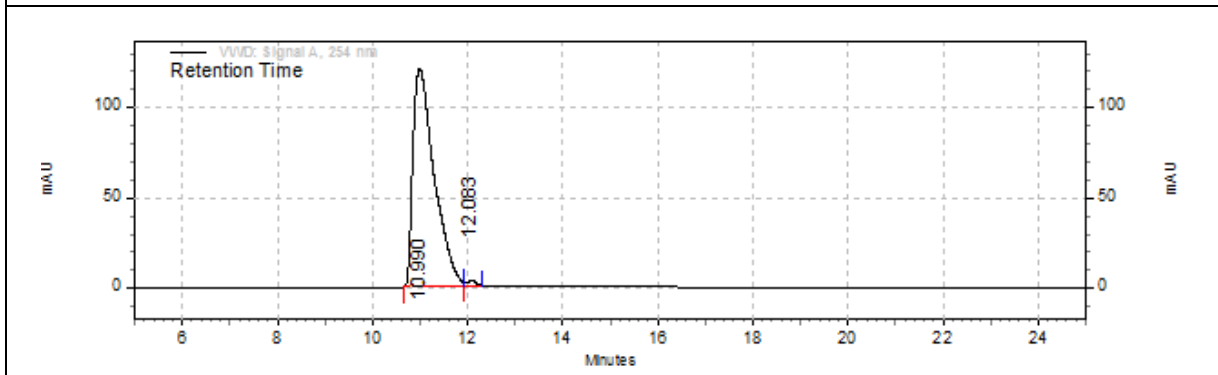

**VWD: Signal  
A, 254 nm**

**Results**

| Retention Time | Area     | Area % | Height  | Height % |
|----------------|----------|--------|---------|----------|
| 10.990         | 59650033 | 99.29  | 1996754 | 98.39    |
| 12.083         | 428803   | 0.71   | 32736   | 1.61     |
| Totals         | 60078836 | 100.00 | 2029490 | 100.00   |

Column :Chiracel OJ-H (4.6X250 nm)

Mobile Phase :IPA:n-Hexane(50:50)

Wavelength :254 nm

Flow rate :0.5ml/min

**(4S, 5S)-4-(4-chlorophenyl)-5-(hydroxymethyl)dihydrofuran-2(3H)-one (11c)**

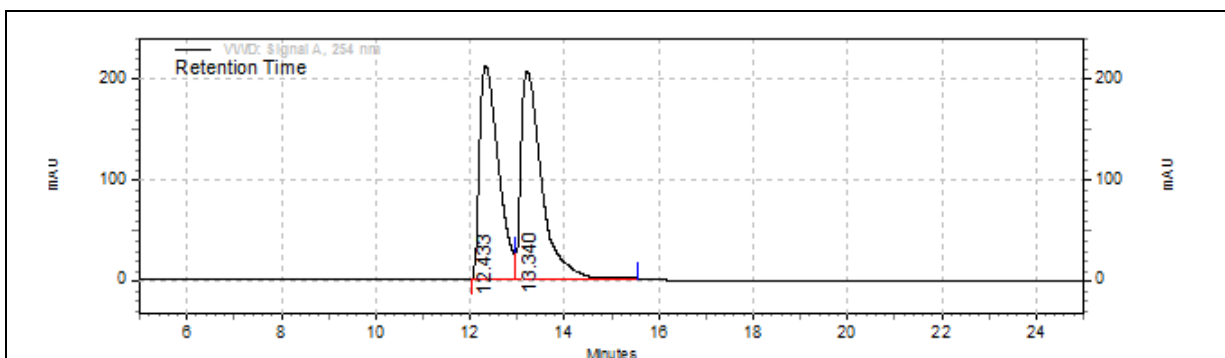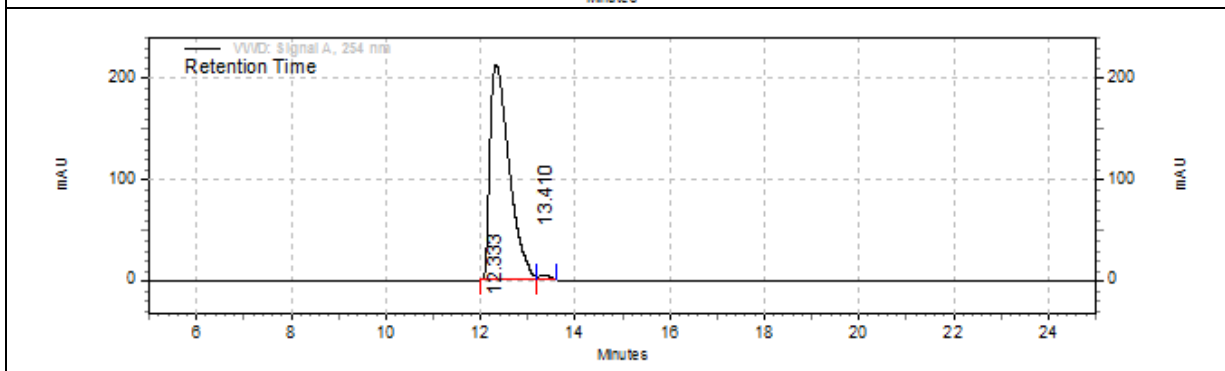

**VWD: Signal**

**A, 254 nm**

**Results**

| Retention Time | Area             | Area %        | Height         | Height %      |
|----------------|------------------|---------------|----------------|---------------|
| 12.333         | 116895600        | 98.83         | 4258259        | 97.94         |
| 13.410         | 1383868          | 1.17          | 89565          | 2.06          |
| <b>Totals</b>  | <b>118279468</b> | <b>100.00</b> | <b>4347824</b> | <b>100.00</b> |

Column :Chiracel OJ-H (4.6X250 nm)

Mobile Phase :IPA:n-Hexane(50:50)

Wavelength :254 nm

Flow rate :0.5ml/min

**(4*S*, 5*S*)-4-(4-bromophenyl)-5-(hydroxymethyl)dihydrofuran-2(3*H*)-one (11d)**

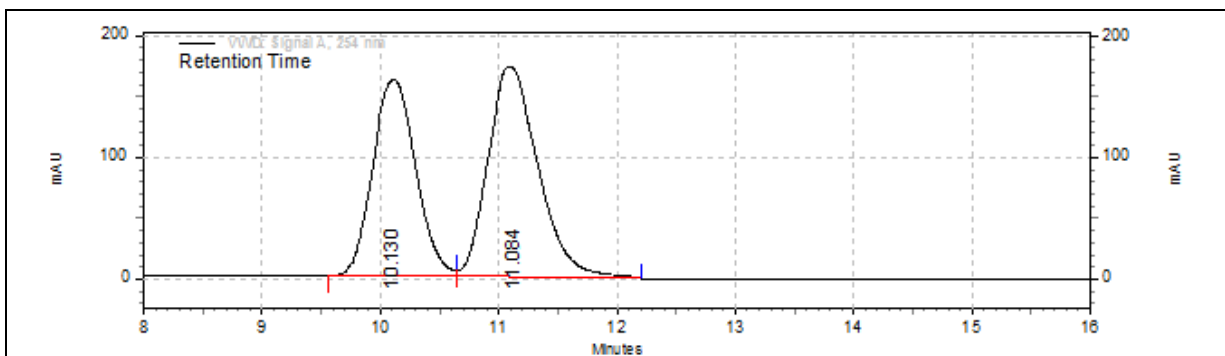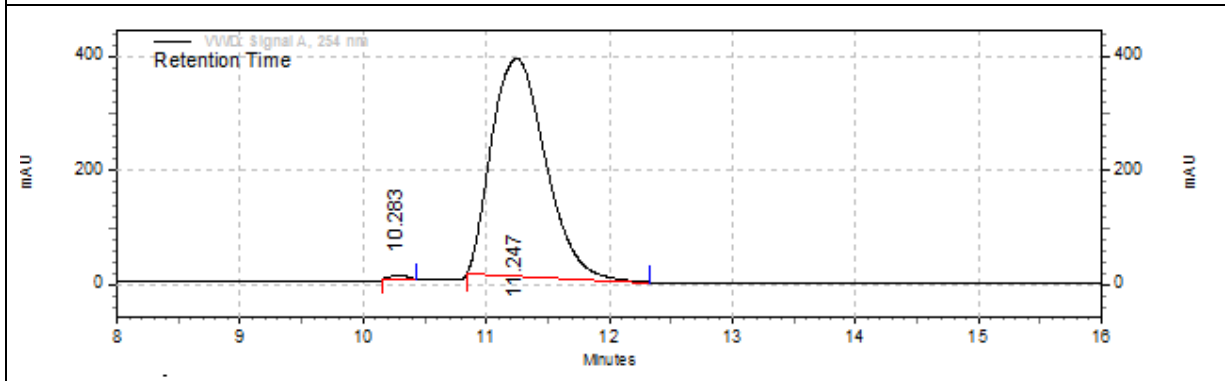

**VWD: Signal**

**A, 254 nm**

**Results**

| Retention Time | Area             | Area %        | Height         | Height %      |
|----------------|------------------|---------------|----------------|---------------|
| 10.283         | 2605821          | 1.31          | 150721         | 2.29          |
| 11.247         | 195852243        | 98.69         | 6430035        | 97.71         |
| <b>Totals</b>  | <b>198458064</b> | <b>100.00</b> | <b>6580756</b> | <b>100.00</b> |

Column :Chiracel OD-H (4.6X250 nm)

Mobile Phase :IPA:n-Hexane(10:90)

Wavelength :254 nm

Flow rate :0.5ml/min

**(R)-methyl 3-((S)-oxiran-2-yl)-3-phenylpropanoate (9a)**

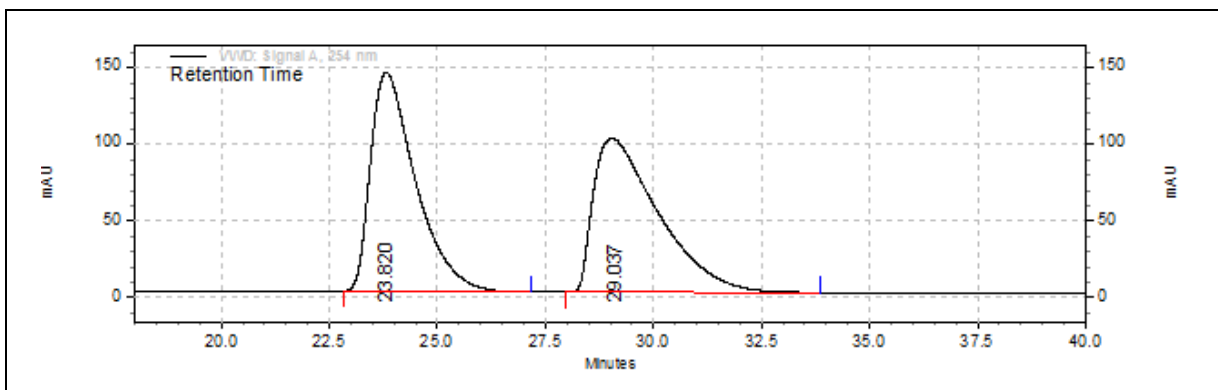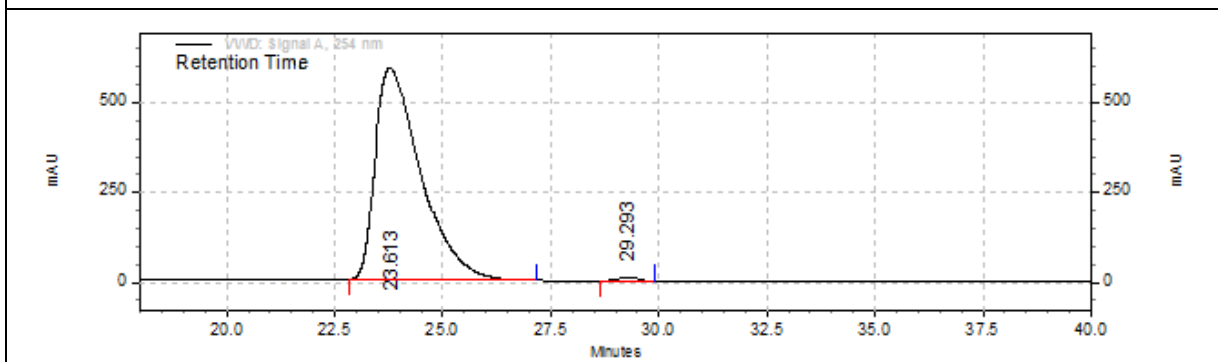

**VWD: Signal**

**A, 254 nm**

**Results**

| Retention Time | Area             | Area %        | Height          | Height %      |
|----------------|------------------|---------------|-----------------|---------------|
| 23.613         | 744775659        | 99.35         | 10081948        | 99.10         |
| 29.293         | 4872714          | 0.65          | 91561           | 0.90          |
| <b>Totals</b>  | <b>749648373</b> | <b>100.00</b> | <b>10173509</b> | <b>100.00</b> |

Column :Chiracel OJ-H (4.6X250 nm)

Mobile Phase :IPA:n-Hexane(10:90)

Wavelength :254 nm

Flow rate :0.5ml/min

**(R)-methyl 3-(4-fluorophenyl)-3-((S)-oxiran-2-yl)propanoate (9b)**

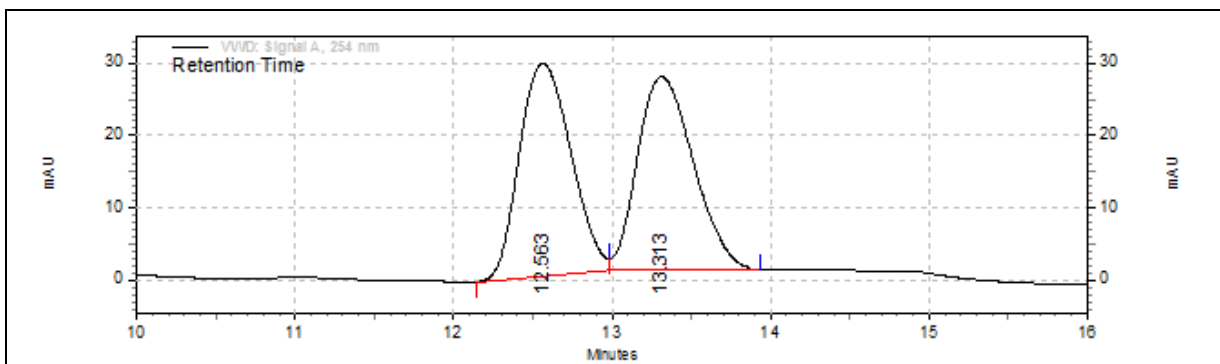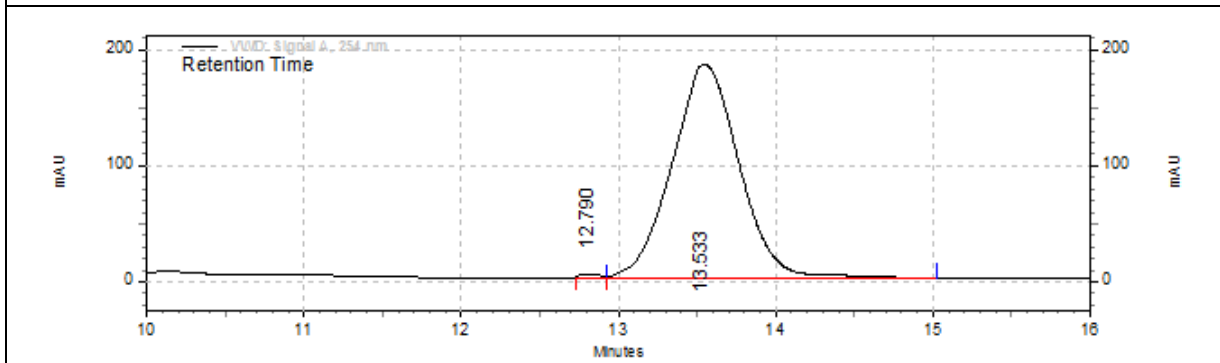

**VWD: Signal A, 254 nm**

**Results**

| Retention Time | Area             | Area %        | Height         | Height %      |
|----------------|------------------|---------------|----------------|---------------|
| 12.790         | 1271922          | 1.00          | 23145          | 0.70          |
| 13.533         | 127169261        | 99.00         | 3283293        | 99.30         |
| <b>Totals</b>  | <b>128441183</b> | <b>100.00</b> | <b>3306438</b> | <b>100.00</b> |

Column :Chiracel OD-H (4.6X250 nm)

Mobile Phase :IPA:n-Hexane(10:90)

Wavelength :254 nm

Flow rate :0.5ml/min

**(R)-methyl 3-(4-chlorophenyl)-3-((S)-oxiran-2-yl)propanoate (9c)**

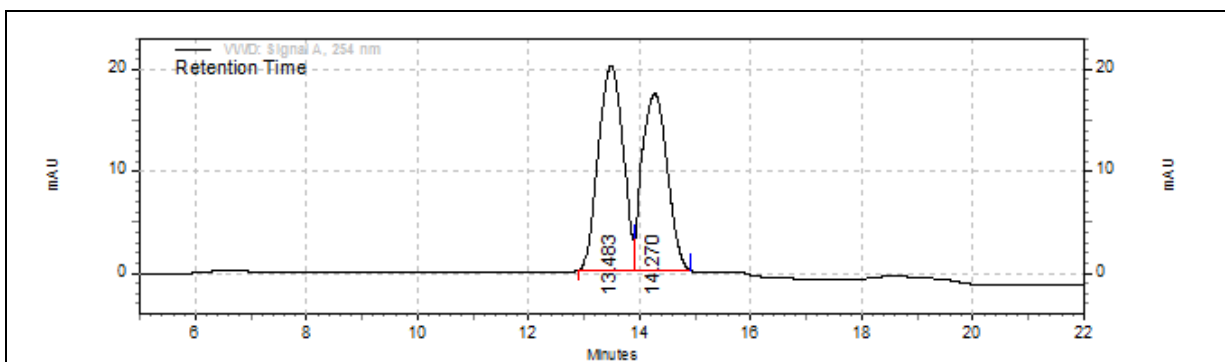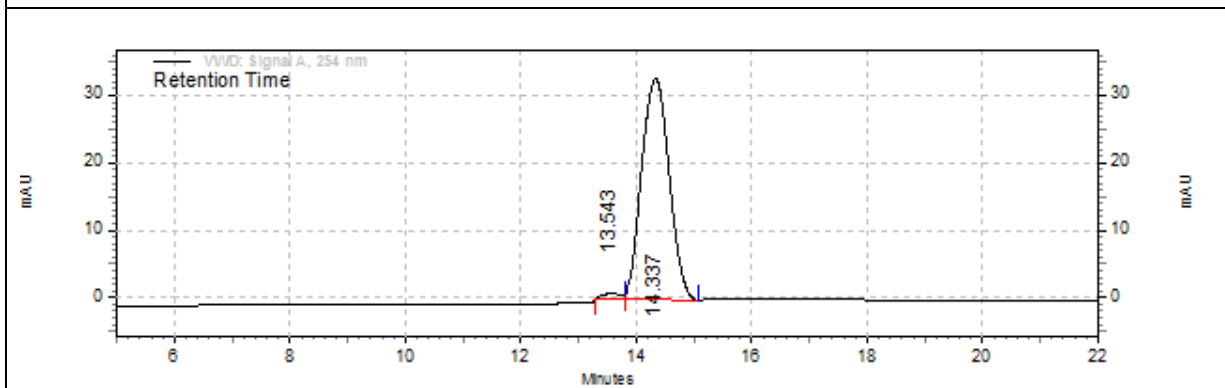

**VWD: Signal**

**A, 254 nm**

**Results**

| Retention Time | Area     | Area % | Height | Height % |
|----------------|----------|--------|--------|----------|
| 13.543         | 360799   | 1.81   | 13201  | 2.15     |
| 14.337         | 19572852 | 98.19  | 600822 | 97.85    |
| Totals         | 19933651 | 100.00 | 614023 | 100.00   |

Column :Chiracel OD-H (4.6X250 nm)

Mobile Phase :IPA:n-Hexane(5:95)

Wavelength :254 nm

Flow rate :0.5ml/min

**(R)-methyl 3-(4-bromophenyl)-3-((S)-oxiran-2-yl)propanoate (9d)**



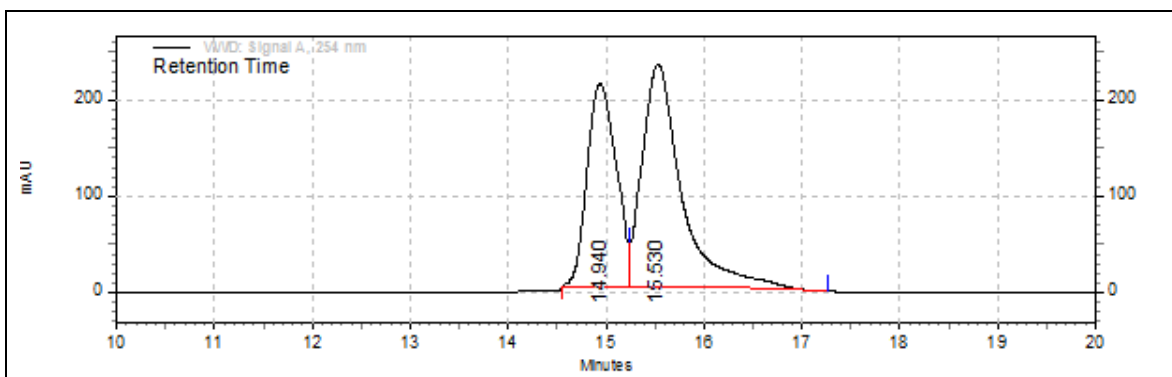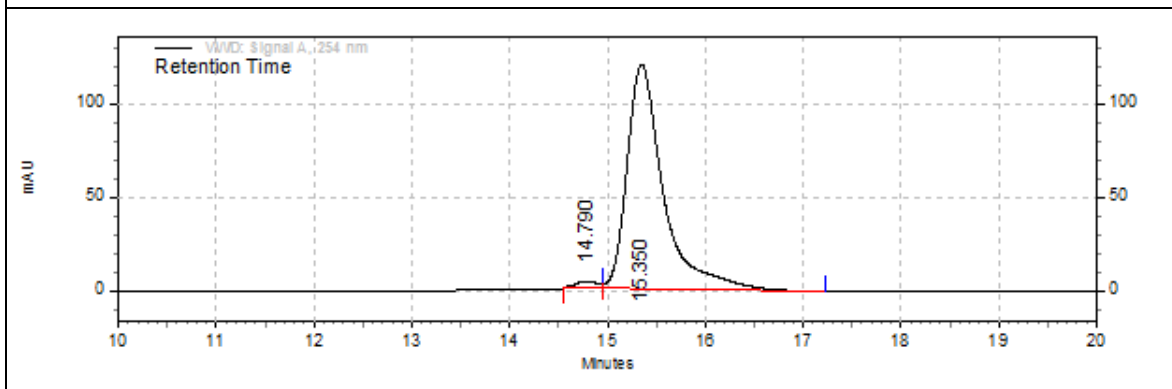

**VWD: Signal  
 A, 254 nm  
 Results**

| Retention Time | Area            | Area %        | Height         | Height %      |
|----------------|-----------------|---------------|----------------|---------------|
| 14.790         | 1095969         | 2.09          | 54486          | 2.64          |
| 15.350         | 51342728        | 97.91         | 2012792        | 97.36         |
| <b>Totals</b>  | <b>52438697</b> | <b>100.00</b> | <b>2067278</b> | <b>100.00</b> |

Column :Chiracel OD-H (4.6X250 nm)

Mobile Phase :IPA:n-Hexane(10:90)

Wavelength :254 nm

Flow rate :0.5ml/min

**(S)-methyl 3-((S)-oxiran-2-yl)-5-phenylpentanoate (9h)**

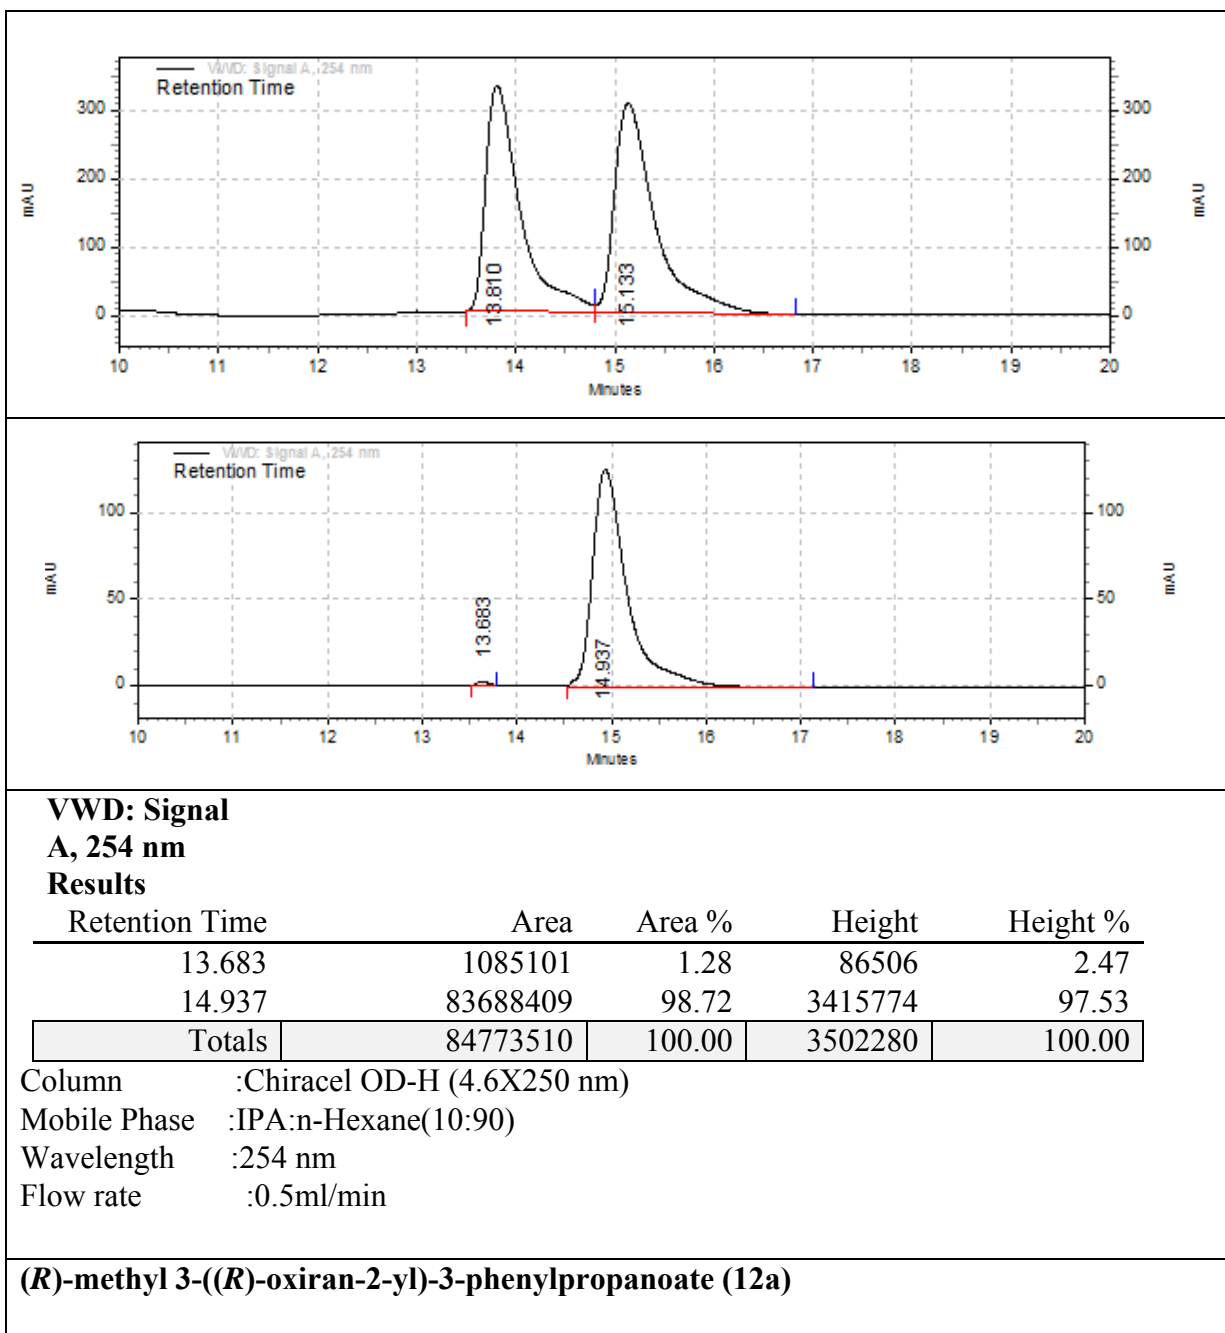

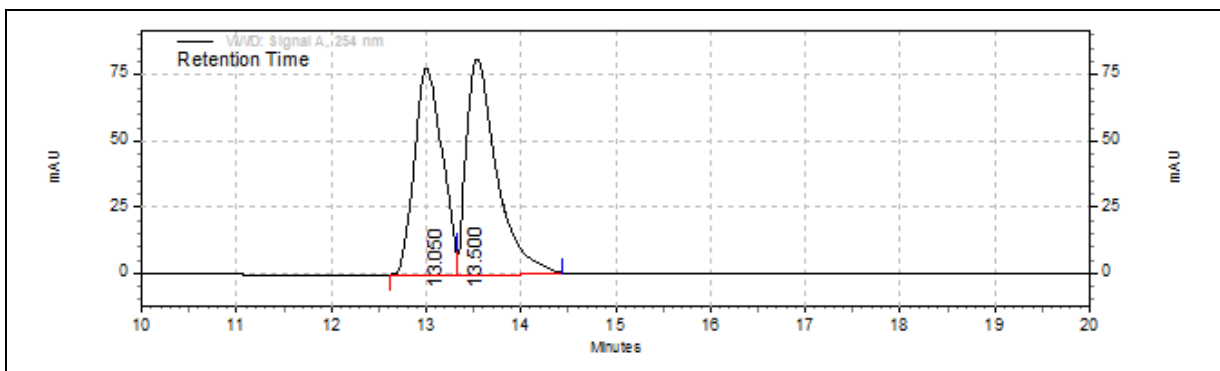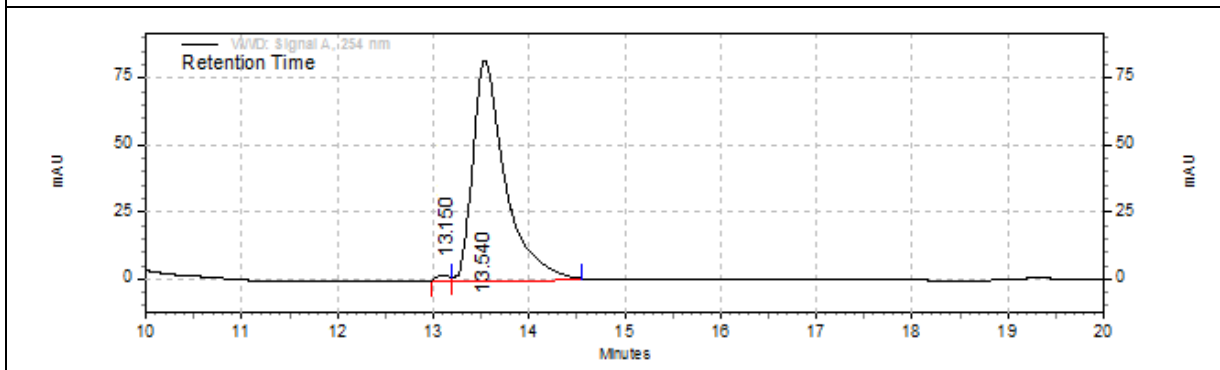

**VWD: Signal  
 A, 254 nm  
 Results**

| Retention Time | Area            | Area %        | Height         | Height %      |
|----------------|-----------------|---------------|----------------|---------------|
| 13.150         | 703311          | 1.59          | 51813          | 2.94          |
| 13.540         | 43530094        | 98.41         | 1710546        | 97.06         |
| <b>Totals</b>  | <b>44233405</b> | <b>100.00</b> | <b>1762359</b> | <b>100.00</b> |

Column :Chiracel OD-H (4.6X250 nm)  
 Mobile Phase :IPA:n-Hexane(10:90)  
 Wavelength :254 nm  
 Flow rate :0.5ml/min

**(R)-methyl 3-(4-chlorophenyl)-3-((R)-oxiran-2-yl)propanoate (12c)**

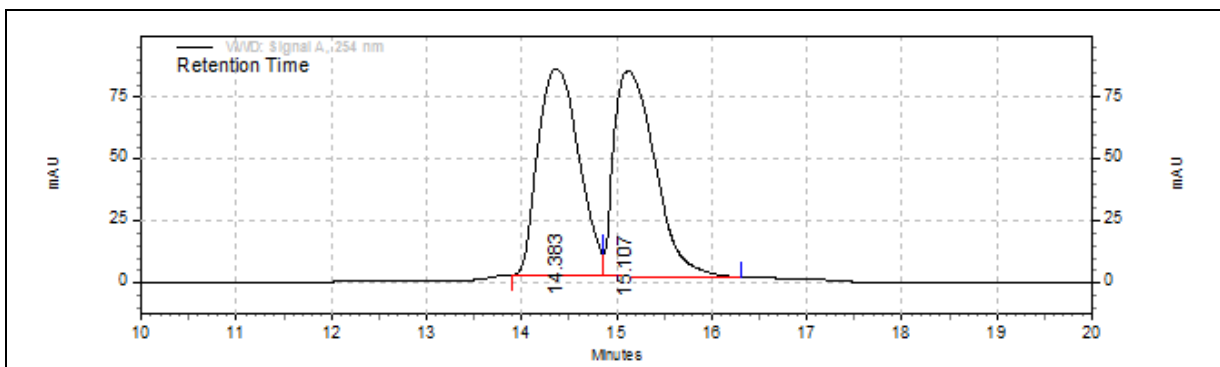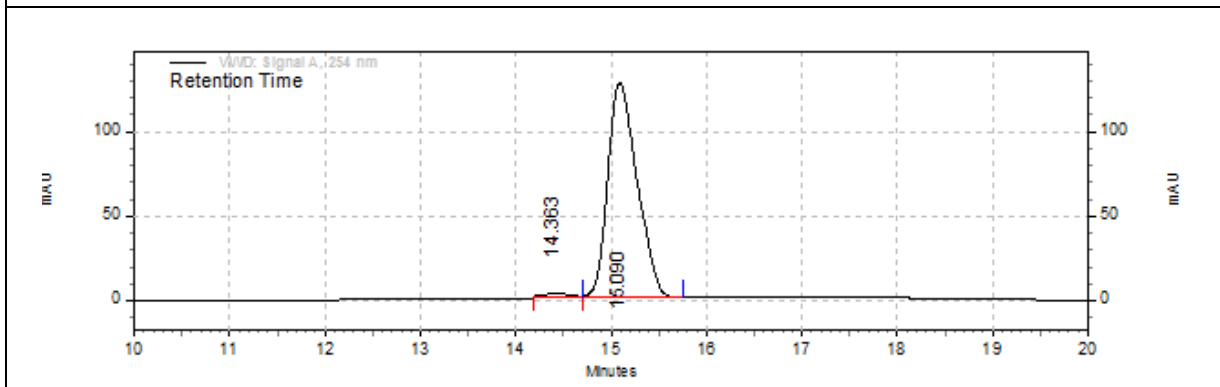

**VWD: Signal  
A, 254 nm**

**Results**

| Retention Time | Area            | Area %        | Height         | Height %      |
|----------------|-----------------|---------------|----------------|---------------|
| 14.363         | 889081          | 1.70          | 42135          | 1.83          |
| 15.090         | 51409808        | 98.30         | 2260328        | 98.17         |
| <b>Totals</b>  | <b>52298889</b> | <b>100.00</b> | <b>2302463</b> | <b>100.00</b> |

Column :Chiracel OD-H (4.6X250 nm)

Mobile Phase :IPA:n-Hexane(10:90)

Wavelength :254 nm

Flow rate :0.5ml/min

**(R)-methyl 3-(4-bromophenyl)-3-((R)-oxiran-2-yl)propanoate (12d)**

## HRMS

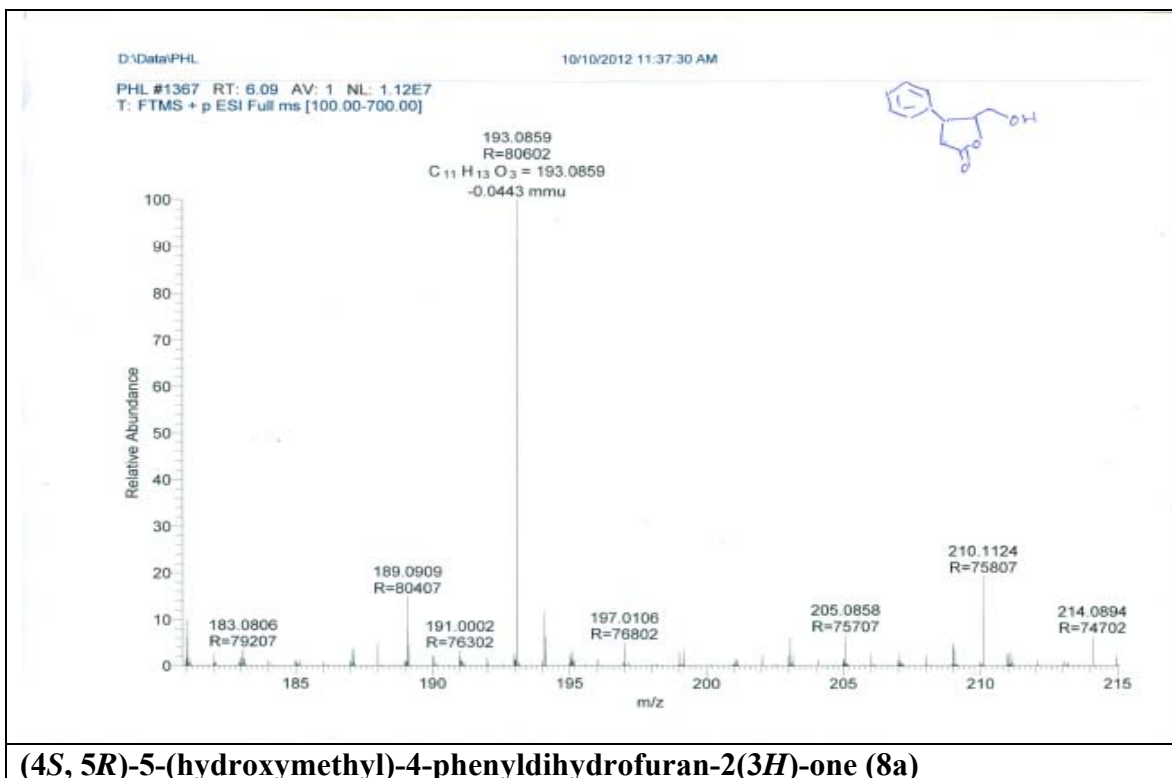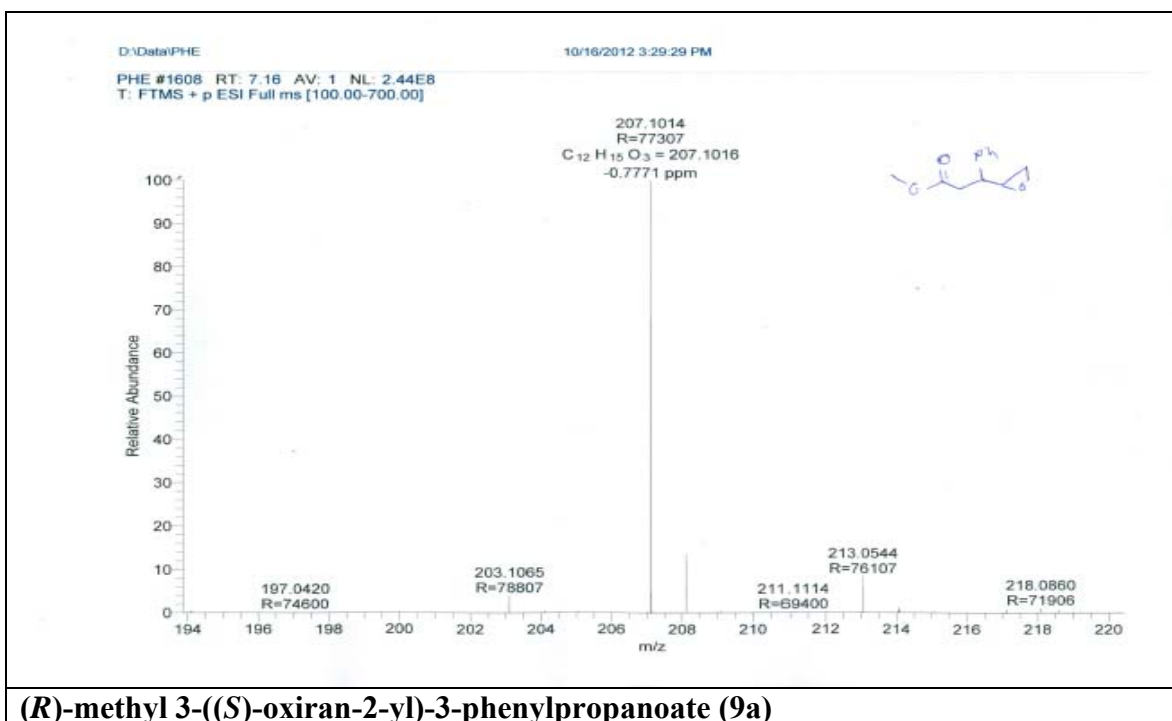

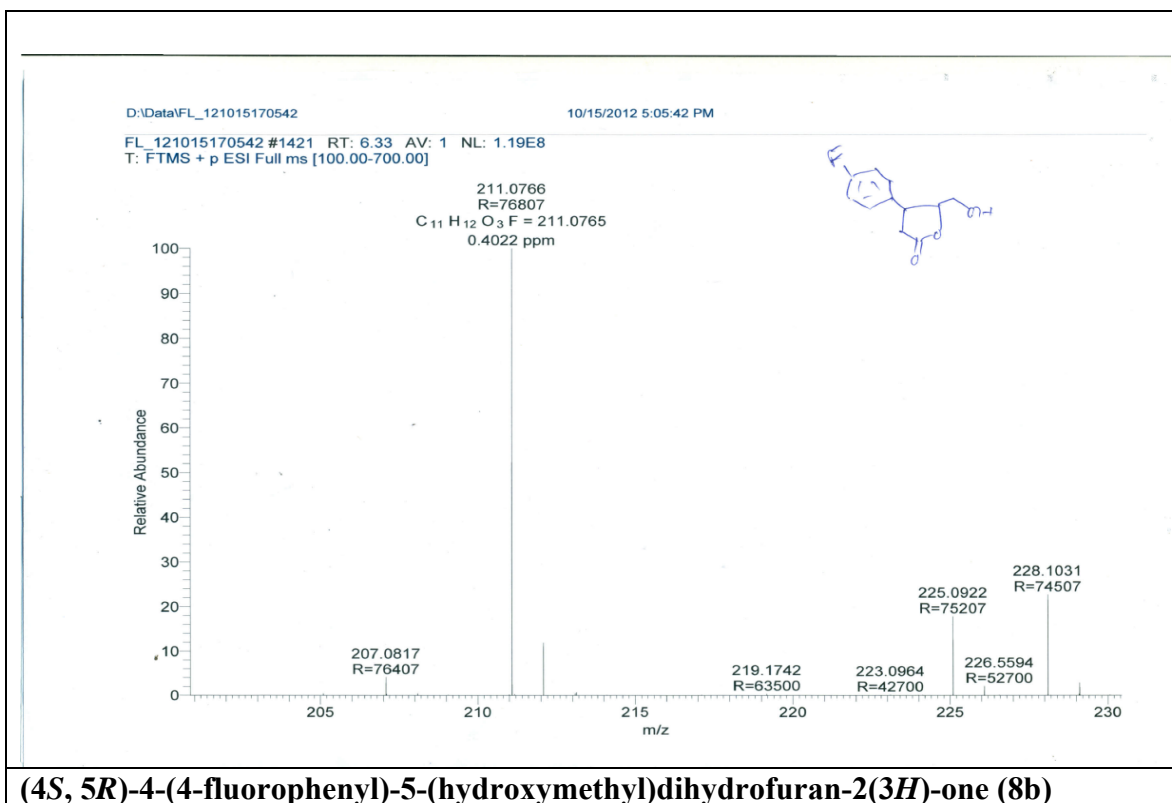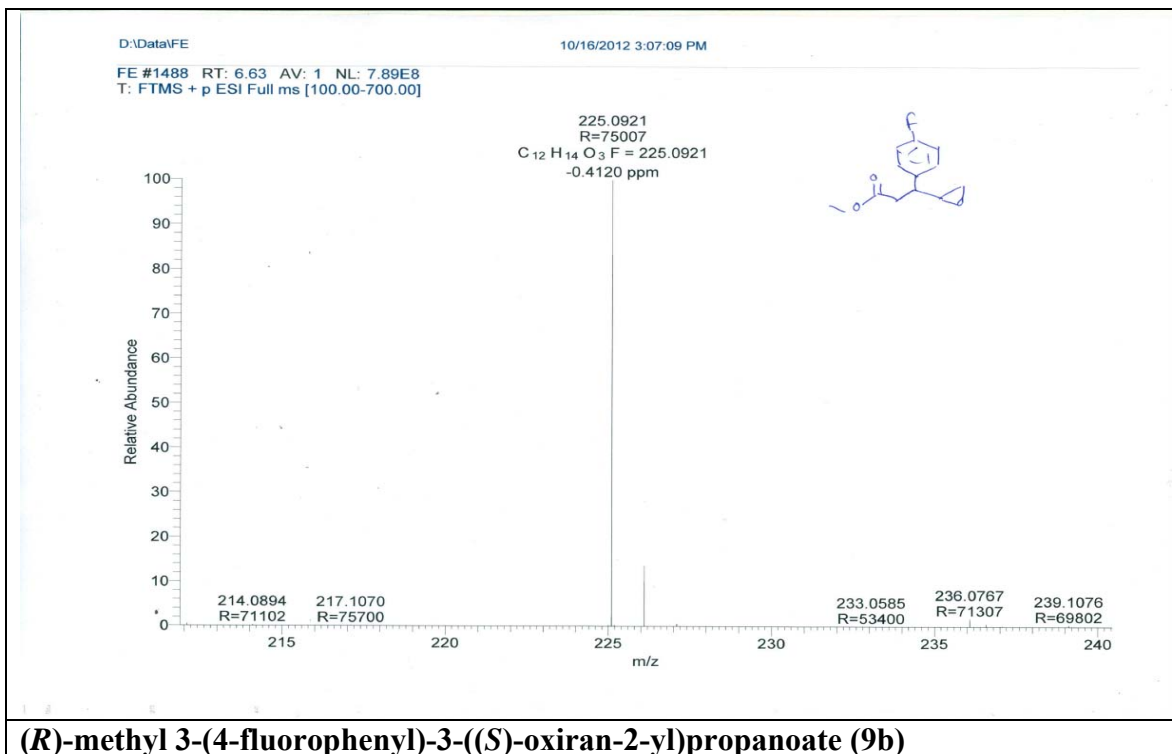

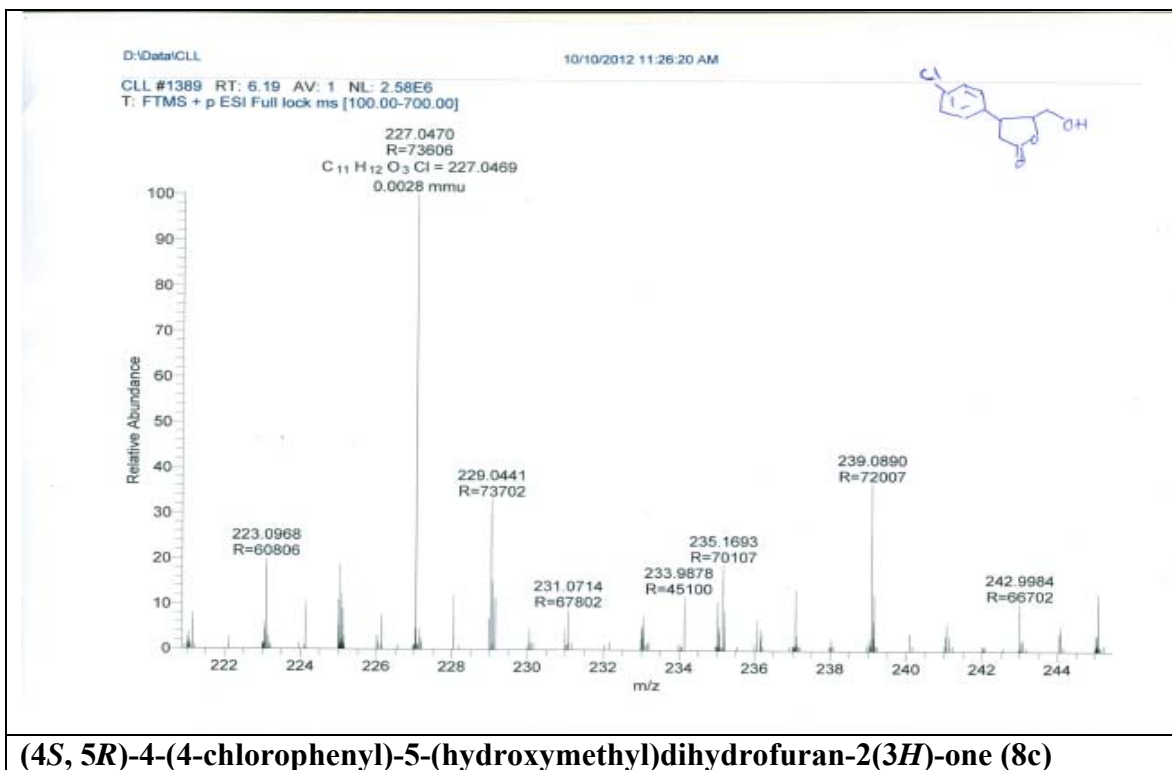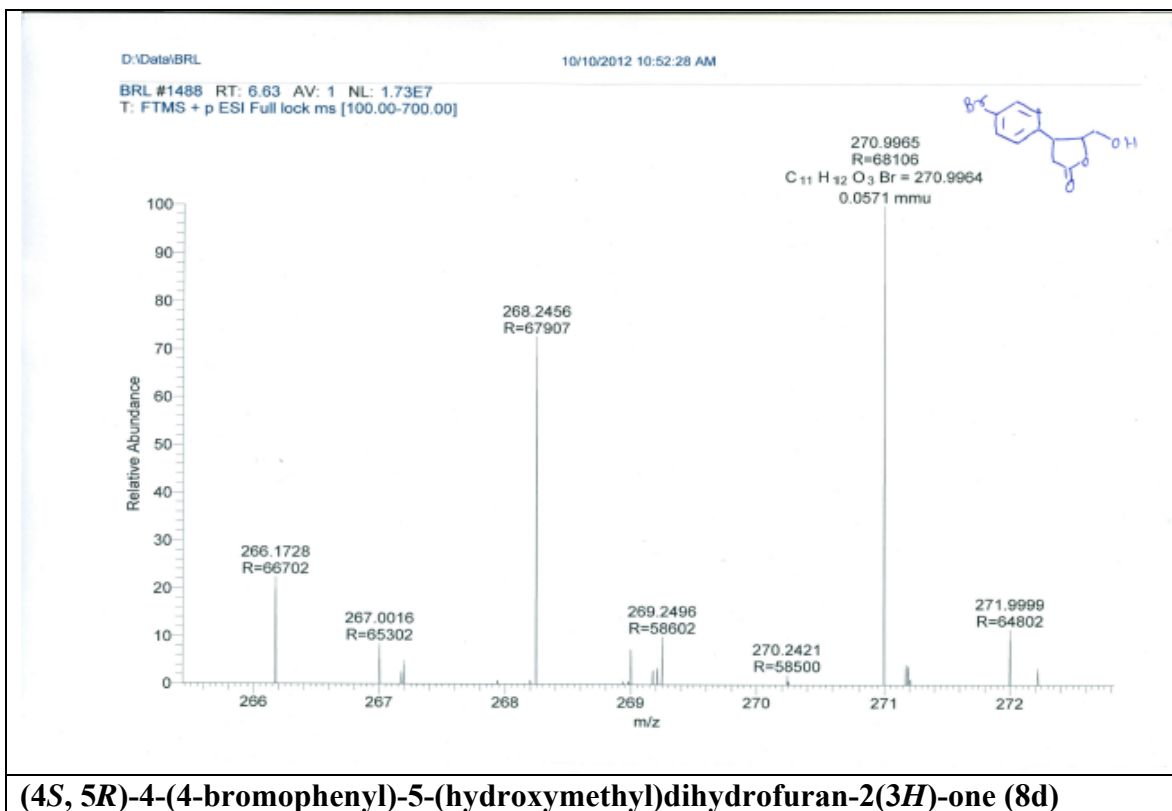

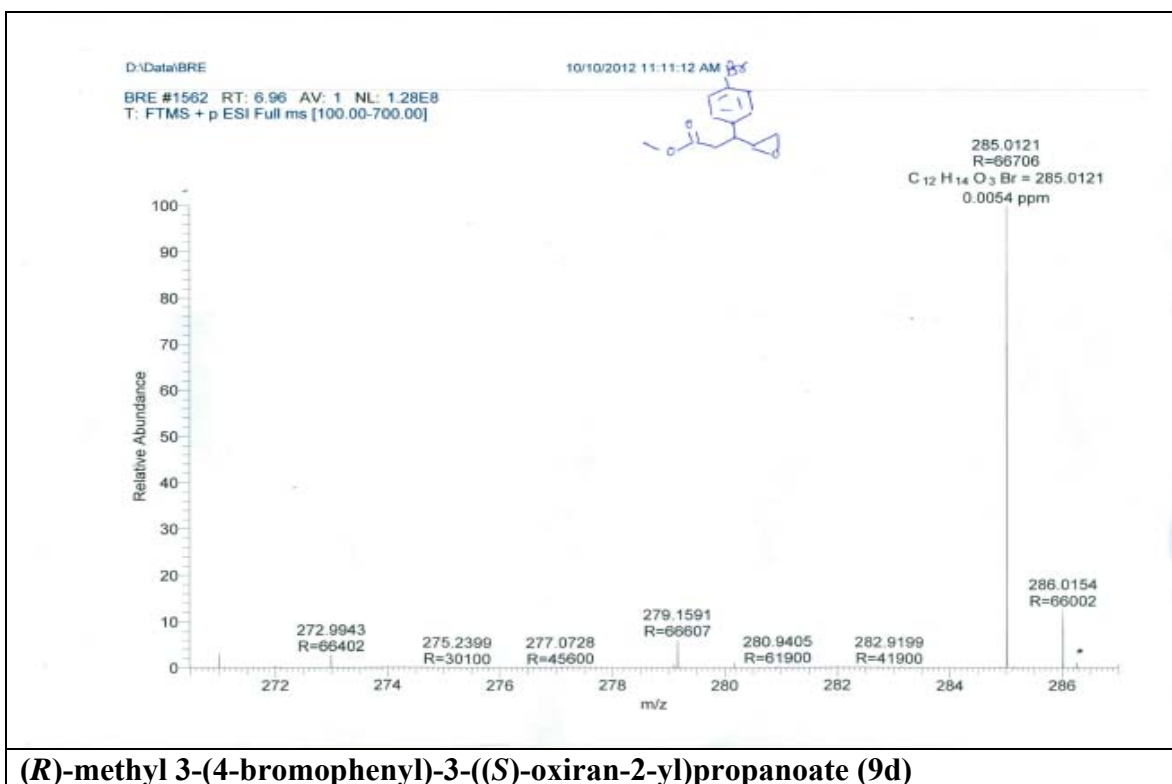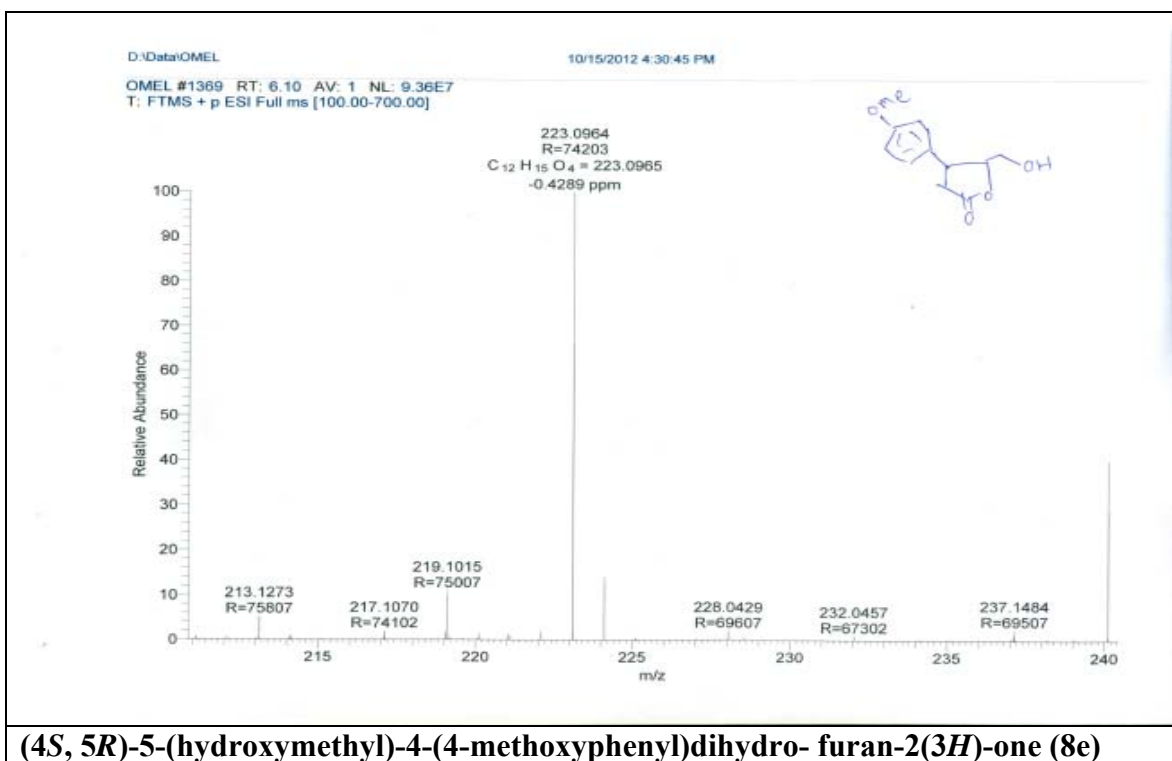



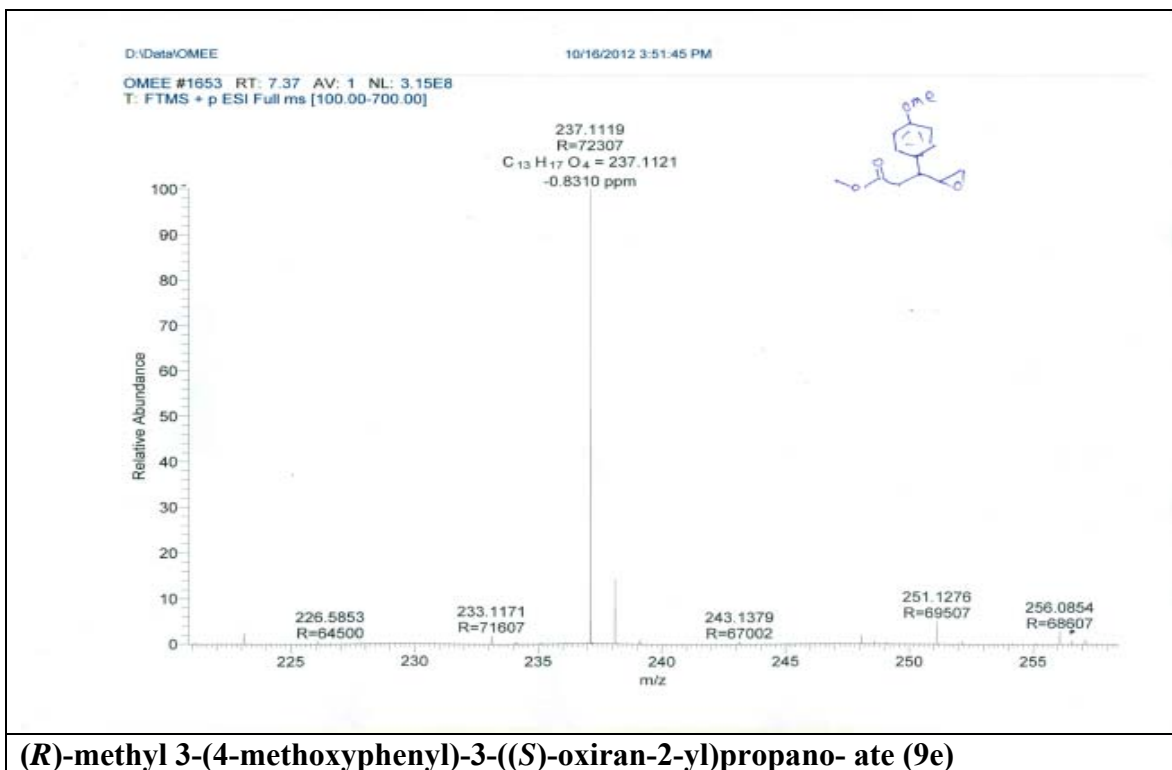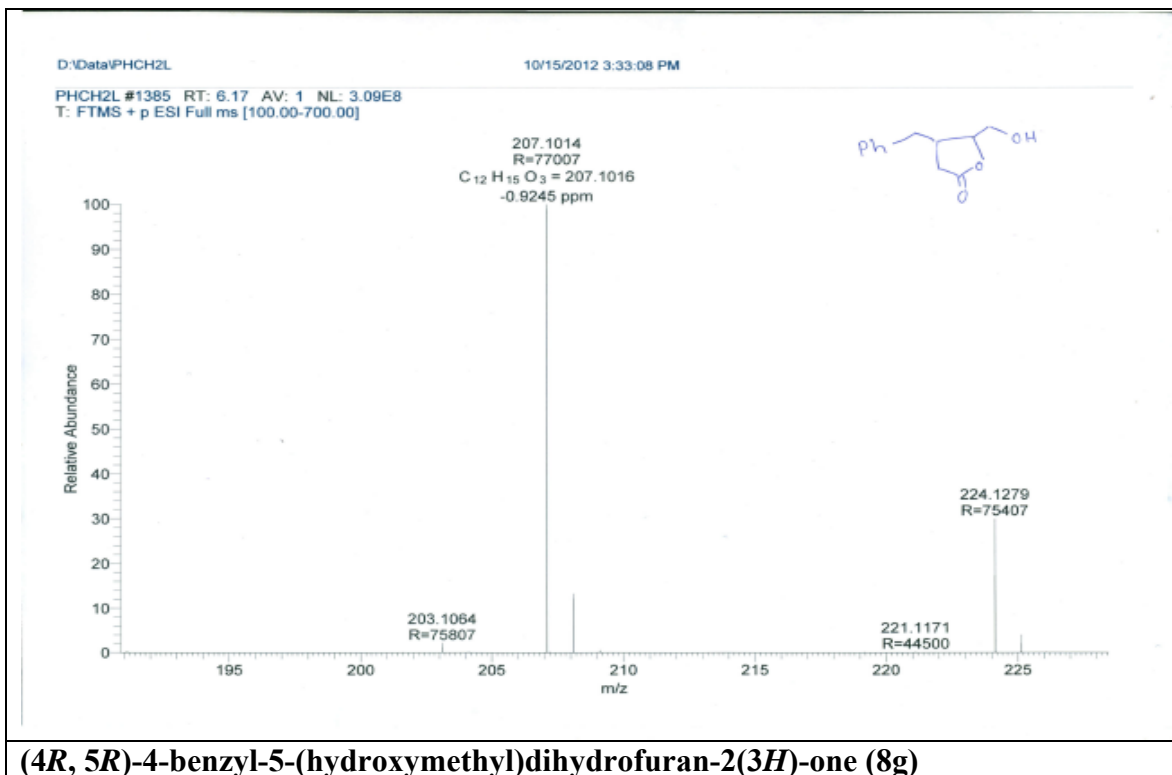

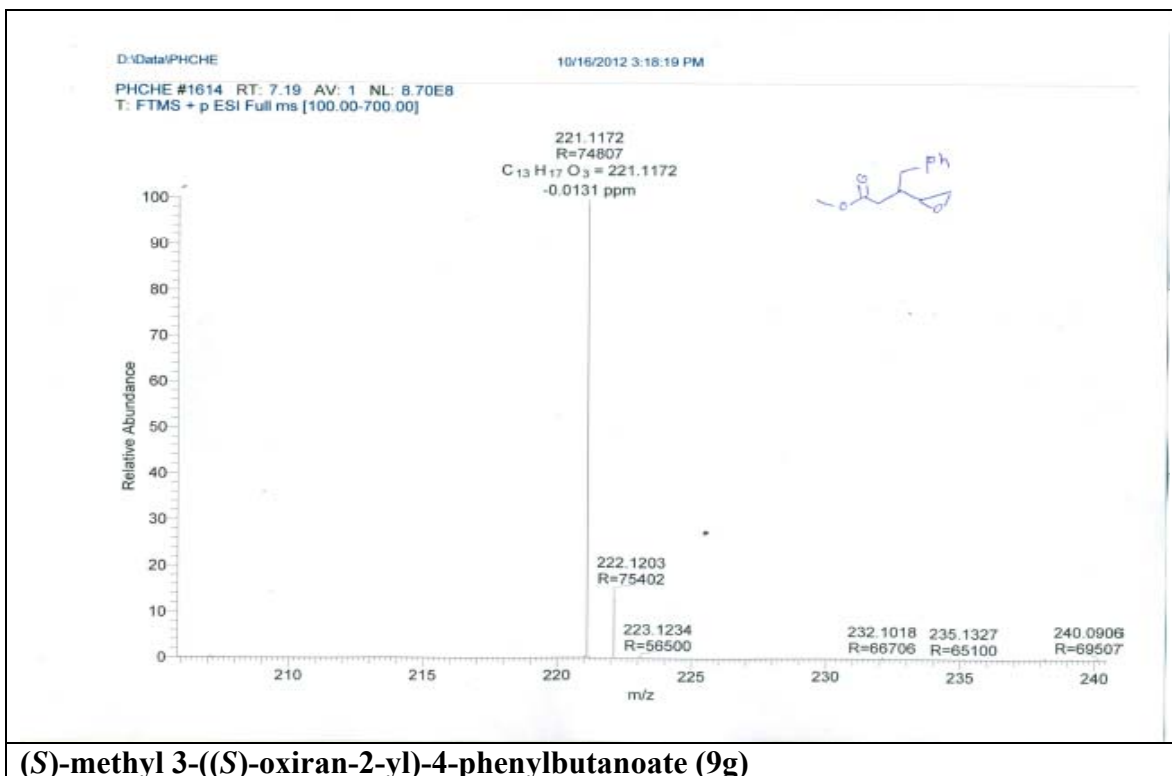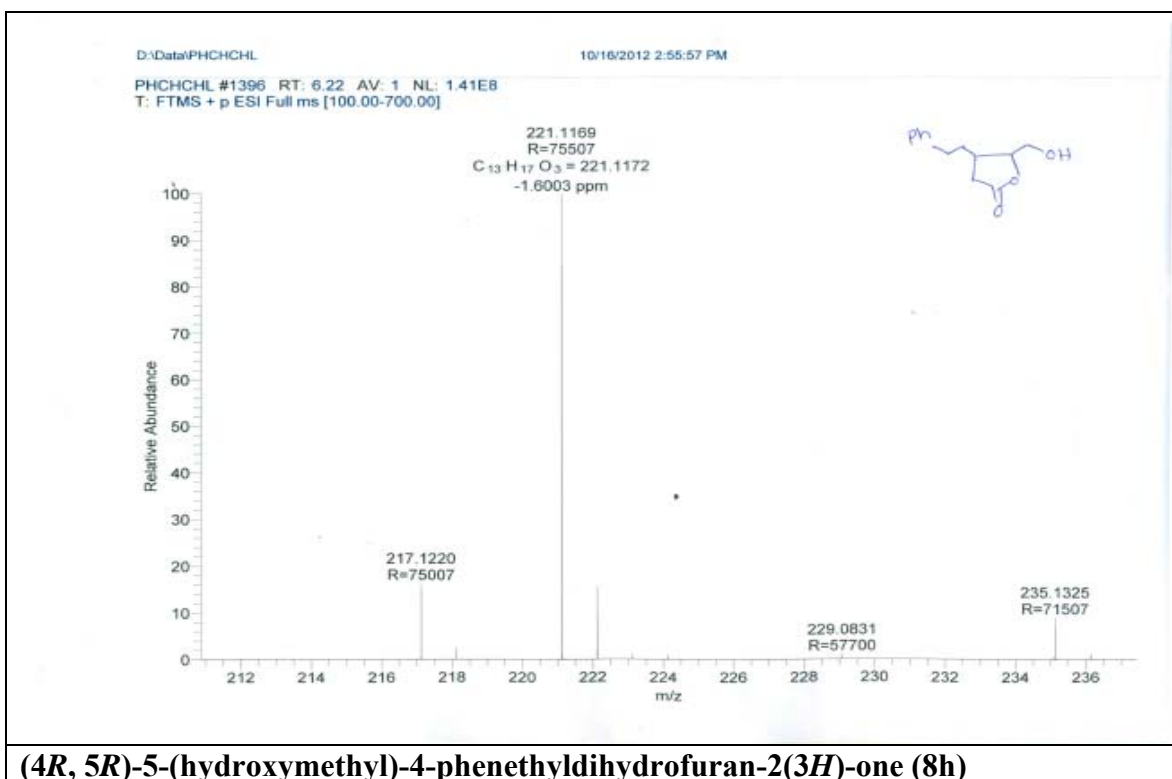

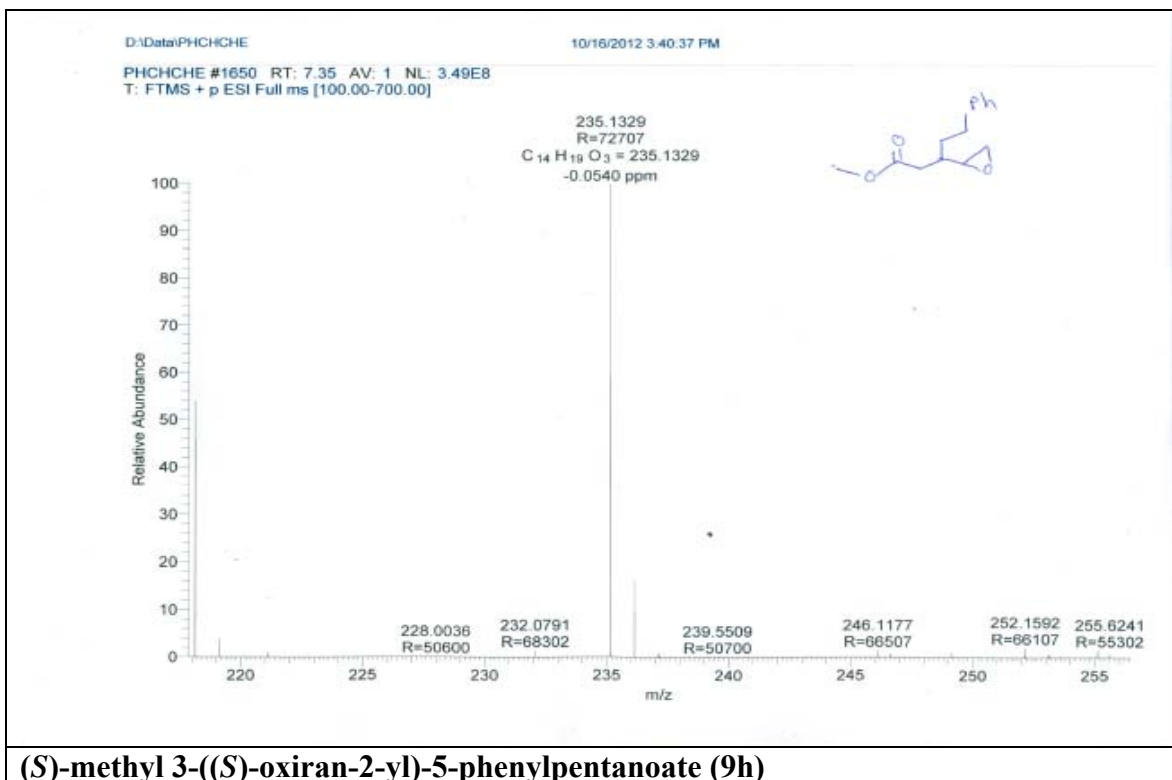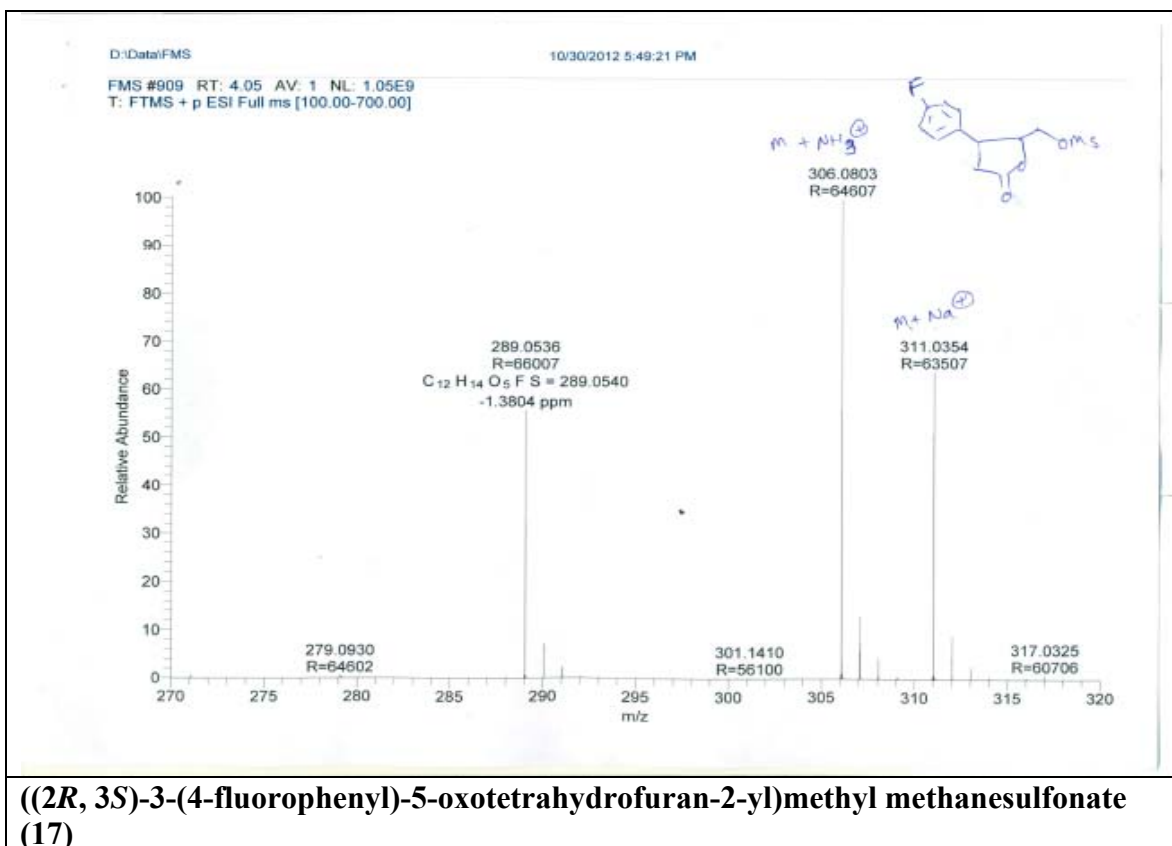

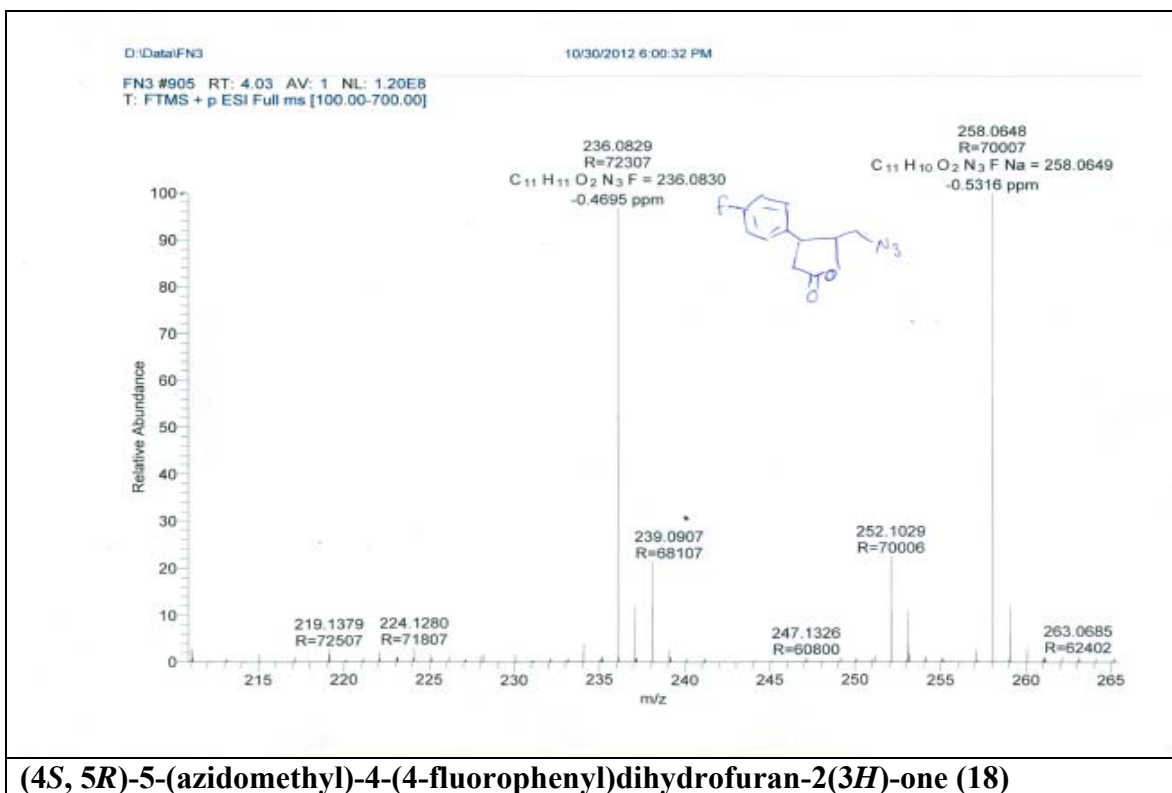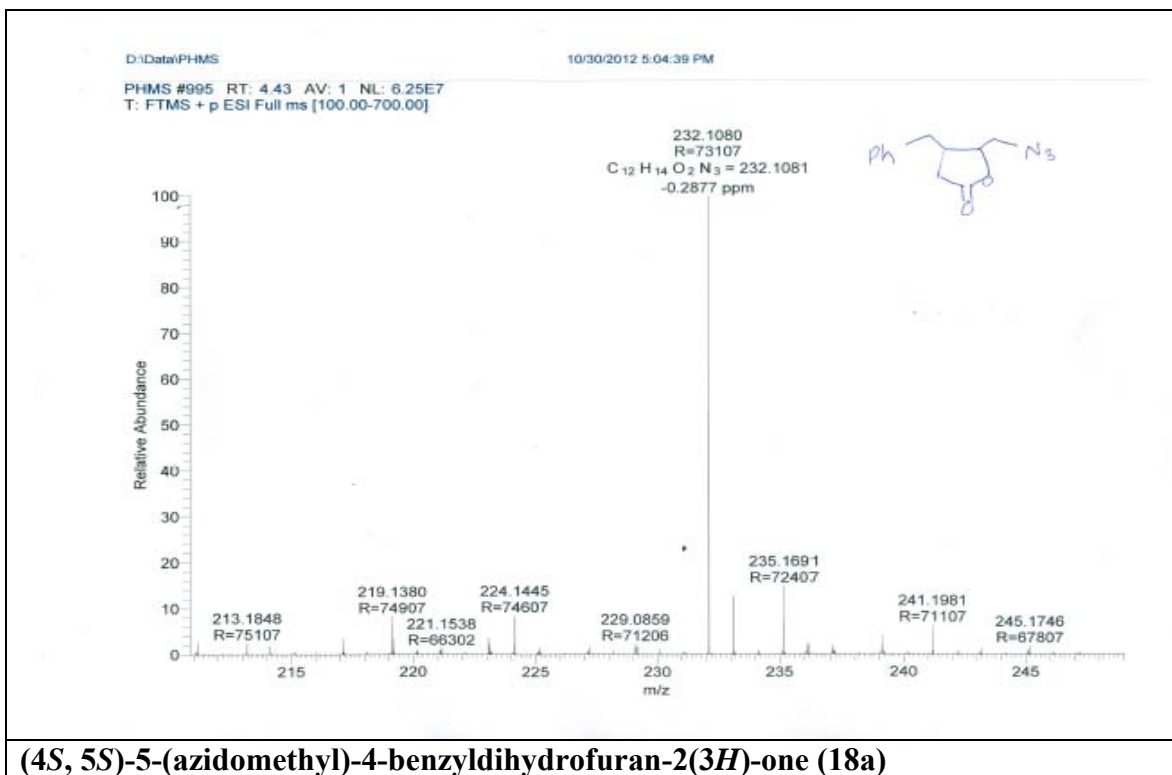

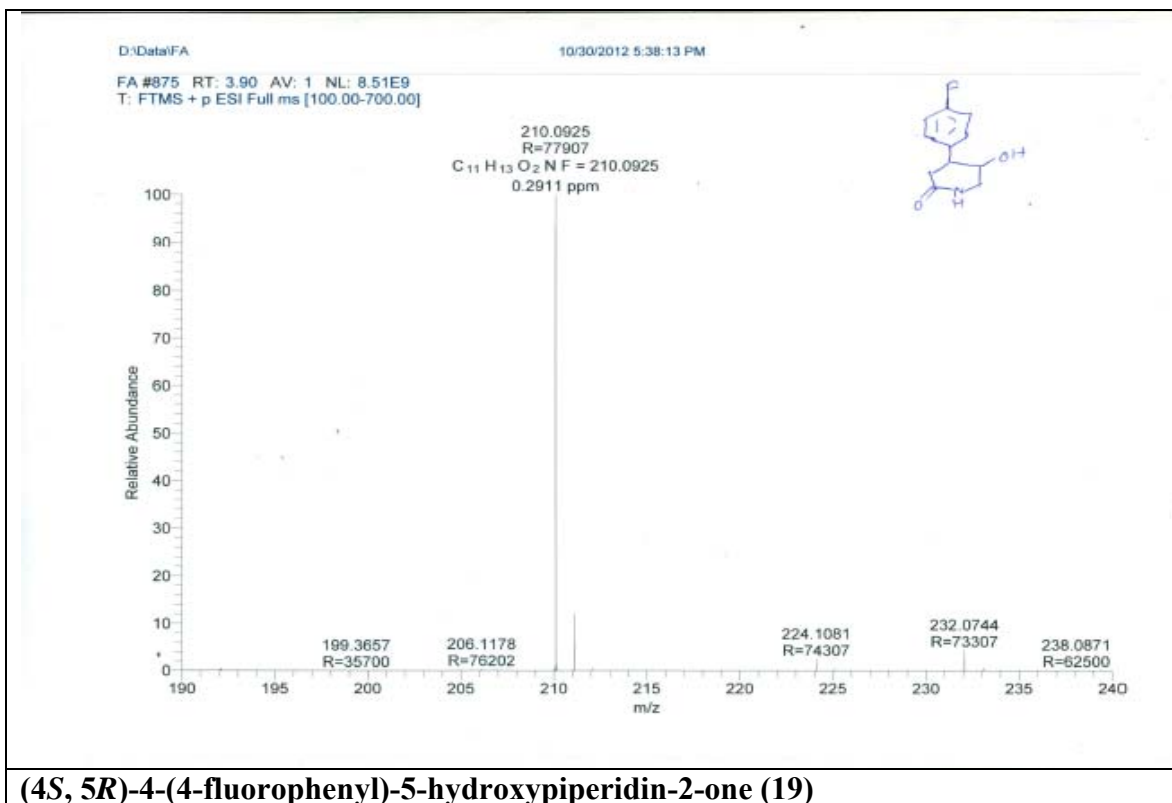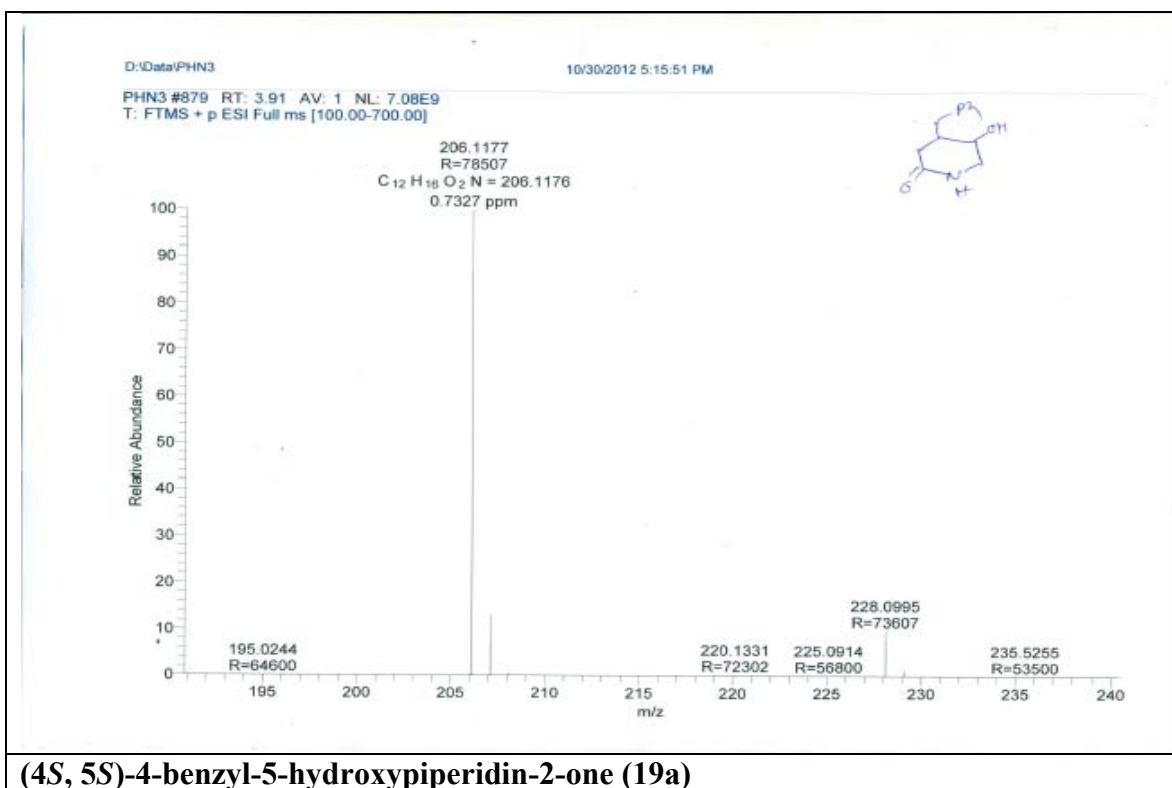

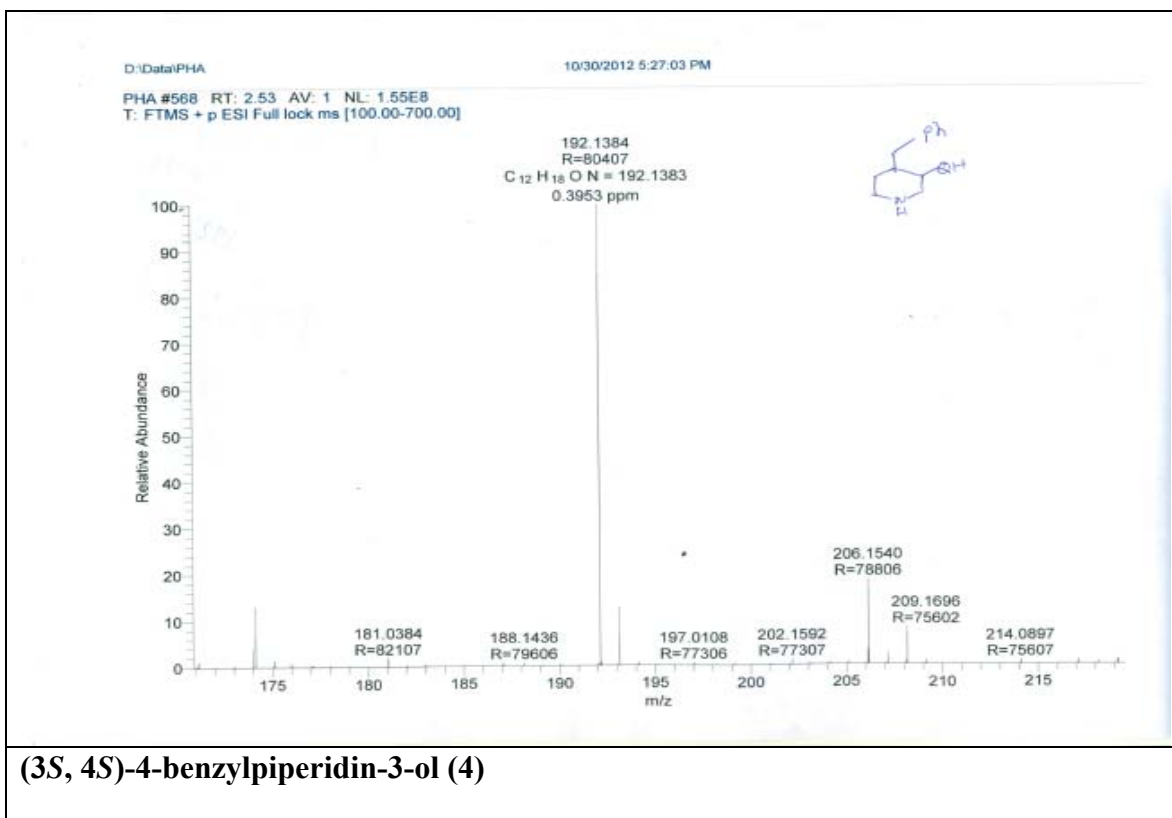

Supplement: c3ob27321k.pdf [file c3ob27321k.pdf]
